# Supplementary material for: Metal-free Lewis-acid-catalyzed divergent trifluoromethylselenolation of alkynes: construction of α-trifluoromethylselenolated ketones and alkynes
Source: Royal Society of Chemistry journal article supplement (doi:10.1039/d3qo01111a), 2023-01-01

## Supporting Information

### **Metal-free Lewis Acid-catalyzed Divergent Trifluoromethylselenolation of Alkynes: Construction of $\alpha$ -Trifluoromethylselenolated Ketones and Trifluoromethylselenolated Alkynes**

Yan Gao,<sup>a</sup> Rui Xiao,<sup>a</sup> Bingbing Feng,<sup>a</sup> Zhiyi Bian,<sup>a</sup> Han Zhang,<sup>a</sup> Gangguo Zhu,<sup>a</sup> Yanan Wang,<sup>\*a</sup> and Zheliang Yuan<sup>\*a</sup>

<sup>a</sup>Key Laboratory of the Ministry of Education for Advanced Catalysis Materials, College of Chemistry and Materials Sciences, Zhejiang Normal University, 688 Yingbin Road, Jinhua 321004, P. R. China.

E-mail: [ynwang@zjnu.edu.cn](mailto:ynwang@zjnu.edu.cn); [zyuan88@zjnu.edu.cn](mailto:zyuan88@zjnu.edu.cn)

#### Contents

|                                                                                               |            |
|-----------------------------------------------------------------------------------------------|------------|
| <b>1. General Information.....</b>                                                            | <b>S1</b>  |
| <b>2. Optimization of the Conditions .....</b>                                                | <b>S1</b>  |
| <b>3. Synthesis of Trifluoromethyl Selenoxides and Substrates.....</b>                        | <b>S3</b>  |
| <b>4. Mechanistic Experiments .....</b>                                                       | <b>S5</b>  |
| <b>5. General Procedure for the Trifluoromethylselenolation and Spectral Data ....</b>        | <b>S8</b>  |
| <b>6. Scale-up Reactions .....</b>                                                            | <b>S26</b> |
| <b>7. Applications .....</b>                                                                  | <b>S27</b> |
| <b>8. References.....</b>                                                                     | <b>S28</b> |
| <b>9. <sup>1</sup>H, <sup>13</sup>C, and <sup>19</sup>F NMR Spectra of New Compounds.....</b> | <b>S30</b> |

## 1. General Information

Unless otherwise noted, materials obtained from commercial suppliers were used directly without further purification.  $^1\text{H}$ ,  $^{13}\text{C}$ , and  $^{19}\text{F}$  NMR spectra were measured on a 600 MHz or 400 MHz NMR spectrometer using  $\text{CDCl}_3$  as the solvent with tetramethylsilane (TMS) as the internal standard. The  $^{19}\text{F}$  NMR spectroscopy was used to determine the  $^{19}\text{F}$  NMR data. Chemical shifts ( $\delta$ ) are given in parts per million relative to TMS, and the coupling constants are given in hertz. The following abbreviations were used to explain the multiplicities: s = singlet, d = doublet, t = triplet, q = quartet, m = multiplet. For  $^1\text{H}$  NMR:  $\text{CDCl}_3 = \delta$  7.26 ppm, for  $^{13}\text{C}$  NMR:  $\text{CDCl}_3 = \delta$  -77.16 ppm. High-resolution mass spectrometry (HRMS) analysis was carried out using an MS instrument with ESI or EI source.

## 2. Optimization of the Conditions

### 2.1 Optimization of the Conditions for Synthesis of **3a**

Table S1: Solvent screening<sup>a</sup>

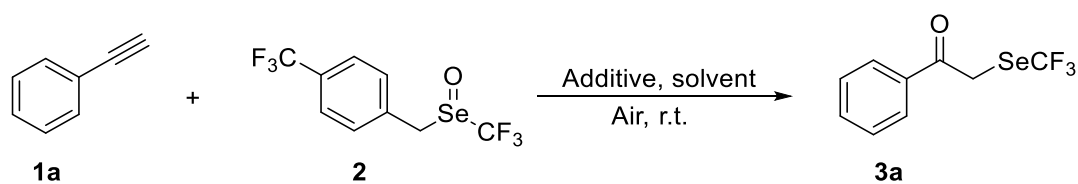

| Entry | <b>1a</b> (eq) | <b>2</b> (eq) | Additive                   | Solvent           | Yield of <b>3a</b> (%) <sup>b</sup> |
|-------|----------------|---------------|----------------------------|-------------------|-------------------------------------|
| 1     | 1.0            | 1.2           | Tf <sub>2</sub> O (1.2 eq) | THF               | 90                                  |
| 2     | 1.0            | 1.2           | Tf <sub>2</sub> O (1.2 eq) | 1,4-dioxane       | 80                                  |
| 3     | 1.0            | 1.2           | Tf <sub>2</sub> O (1.2 eq) | Et <sub>2</sub> O | 42                                  |
| 4     | 1.0            | 1.2           | Tf <sub>2</sub> O (1.2 eq) | EtOH              | 97                                  |

<sup>a</sup>Reaction conditions: **1a** (0.10 mmol), **2** (0.12 mmol), additive (0.12 mmol), solvent (1 mL) at r.t.

for 12 h. <sup>b</sup>Yield of **3a** was determined by <sup>19</sup>F NMR (*N,N*-dimethyltrifluoroacetamide as internal standard).

**Table S2: Additive screening<sup>a</sup>**

| Entry           | <b>1a</b> (eq) | <b>2</b> (eq) | Additive                                    | Solvent     | Yield of <b>3a</b> (%) <sup>b</sup> |
|-----------------|----------------|---------------|---------------------------------------------|-------------|-------------------------------------|
| 1               | 1.0            | 1.2           | BF <sub>3</sub> •Et <sub>2</sub> O (1.2 eq) | THF         | 74                                  |
| 2               | 1.0            | 1.2           | BF <sub>3</sub> •Et <sub>2</sub> O (1.2 eq) | 1,4-dioxane | 99                                  |
| 3               | 1.0            | 1.2           | BF <sub>3</sub> •Et <sub>2</sub> O (0.8 eq) | 1,4-dioxane | 99                                  |
| 4 <sup>c</sup>  | 1.0            | 1.2           | BF <sub>3</sub> •Et <sub>2</sub> O (0.4 eq) | 1,4-dioxane | 97                                  |
| 5 <sup>c</sup>  | 1.0            | 1.2           | BF <sub>3</sub> •Et <sub>2</sub> O (0.3 eq) | 1,4-dioxane | 97                                  |
| 6 <sup>c</sup>  | 1.0            | 1.2           | BF <sub>3</sub> •Et <sub>2</sub> O (0.2 eq) | 1,4-dioxane | 60                                  |
| 7               | 1.0            | 1.2           | CuCl <sub>2</sub> (0.2 eq)                  | 1,4-dioxane | 0                                   |
| 8               | 1.0            | 1.2           | 36% HCl (0.2 eq)                            | 1,4-dioxane | trace                               |
| 9               | 1.0            | 1.2           | TMSCl (0.2 eq)                              | 1,4-dioxane | 0                                   |
| 10 <sup>c</sup> | 1.0            | 1.2           | TfOH (0.2 eq)                               | 1,4-dioxane | 65%                                 |

<sup>a</sup>Reaction conditions: **1a** (0.10 mmol), **2** (0.12 mmol), additive, solvent (1 mL) at r.t. for 12h.

<sup>b</sup>Yield of **3a** was determined by <sup>19</sup>F NMR (*N,N*-dimethyltrifluoroacetamide as internal standard).

<sup>c</sup>24 h.

## 2.2 Optimization of the Conditions for Synthesis of Compound **5a**

**Table S3: Optimization of the Conditions for Synthesis of Compound **5a**<sup>a</sup>**

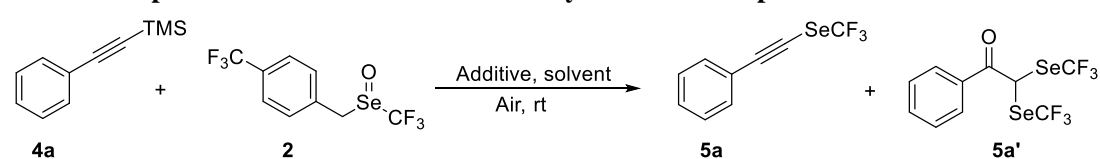

| Entry          | <b>2</b> (eq)    | Additive                                    | Yield of <b>5a</b> (%) <sup>b</sup> | Yield of <b>5a'</b> (%) <sup>b</sup> |
|----------------|------------------|---------------------------------------------|-------------------------------------|--------------------------------------|
| 1 <sup>c</sup> | 1.2              | BF <sub>3</sub> •Et <sub>2</sub> O (0.3 eq) | 80                                  | 20                                   |
| 2 <sup>c</sup> | 1.2              | BF <sub>3</sub> •Et <sub>2</sub> O (0.4 eq) | 81                                  | 19                                   |
| 3              | 1.2              | Tf <sub>2</sub> O (0.2 eq)                  | 86                                  | 13                                   |
| 4              | 1.2              | TfOH (0.2 eq)                               | 82                                  | 12                                   |
| 5              | 1.2              | Tf <sub>2</sub> O (0.1 eq)                  | 70                                  | 18                                   |
| 6              | 1.2              | BF <sub>3</sub> •Et <sub>2</sub> O (0.2 eq) | 21                                  | trace                                |
| <b>7</b>       | <b>1.0</b>       | <b>Tf<sub>2</sub>O (0.2 eq)</b>             | <b>85</b>                           | <b>trace</b>                         |
| 8              | 1.0              | TMSOTf (0.2 eq)                             | 73                                  | trace                                |
| 9              | 1.0 <sup>d</sup> | Tf <sub>2</sub> O (0.2 eq)                  | 17 <sup>e</sup>                     | trace                                |
| 10             | 1.0 <sup>f</sup> | Tf <sub>2</sub> O (0.2 eq)                  | 37 <sup>g</sup>                     | trace                                |
| 11             | 1.0              | ---                                         | NR                                  | NR                                   |

<sup>a</sup>Reaction conditions: **4a** (0.10 mmol), **2** (0.12/0.10 mmol), 1,4-dioxane (1 mL) at r.t. for 12 h.

<sup>b</sup>Yield of **5a** and **5a'** was determined by <sup>19</sup>F NMR (*N,N*-dimethyltrifluoroacetamide as internal standard). <sup>c</sup>49 h. <sup>d</sup>alkyne **4** with TBS substituent instead of TMS. <sup>e</sup>with 50% substrate remained.

<sup>f</sup>alkyne **4** with TES substituent instead of TMS. <sup>g</sup>with 52% substrate remained.

### 3. Synthesis of Trifluoromethyl Selenoxides and Substrates

#### 3.1 Synthesis of Trifluoromethyl Selenoxides

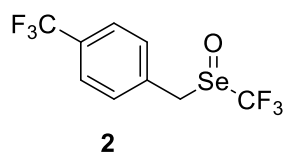

**2** is known compound and prepared according to the literature.<sup>S1</sup>

### 3.2 Synthesis of Alkynes

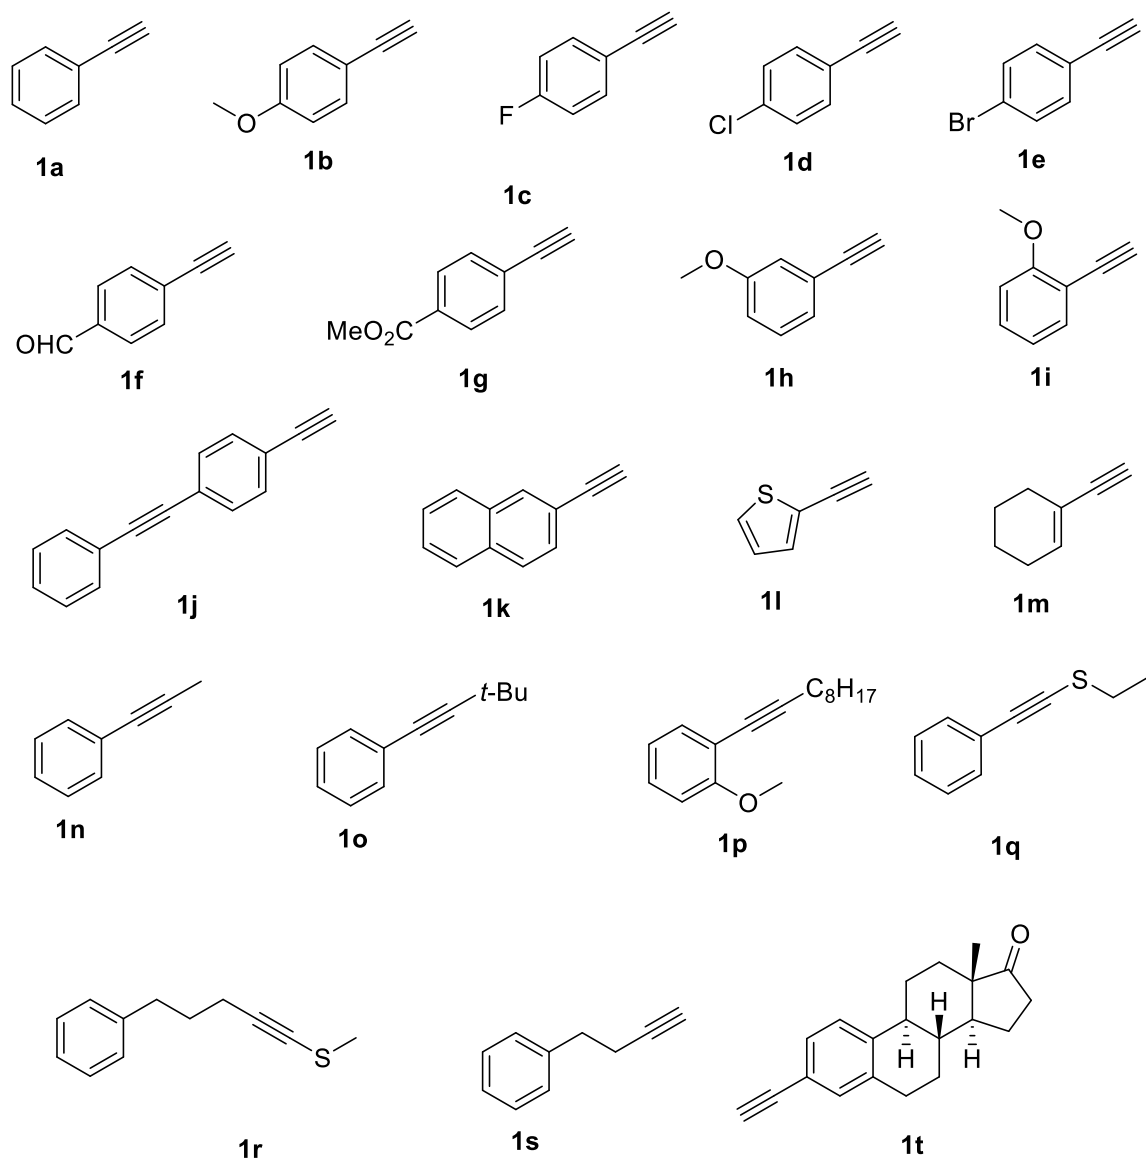

**1a, 1b, 1c, 1d, 1e, 1f, 1g, 1h, 1i, 1l, 1m, 1n, 1s** are commercially available and purchased from Bide Pharmatech or Energy Chemical.

**1j<sup>S2</sup>, 1k<sup>S3</sup>, 1o<sup>S4</sup>, 1t<sup>S5</sup>, 1p<sup>S6</sup>, 1q<sup>S7</sup>, 1r<sup>S8</sup>** are known compounds and prepared according to the literatures.

### 3.3 Synthesis of Trimethylsilylacetylenes

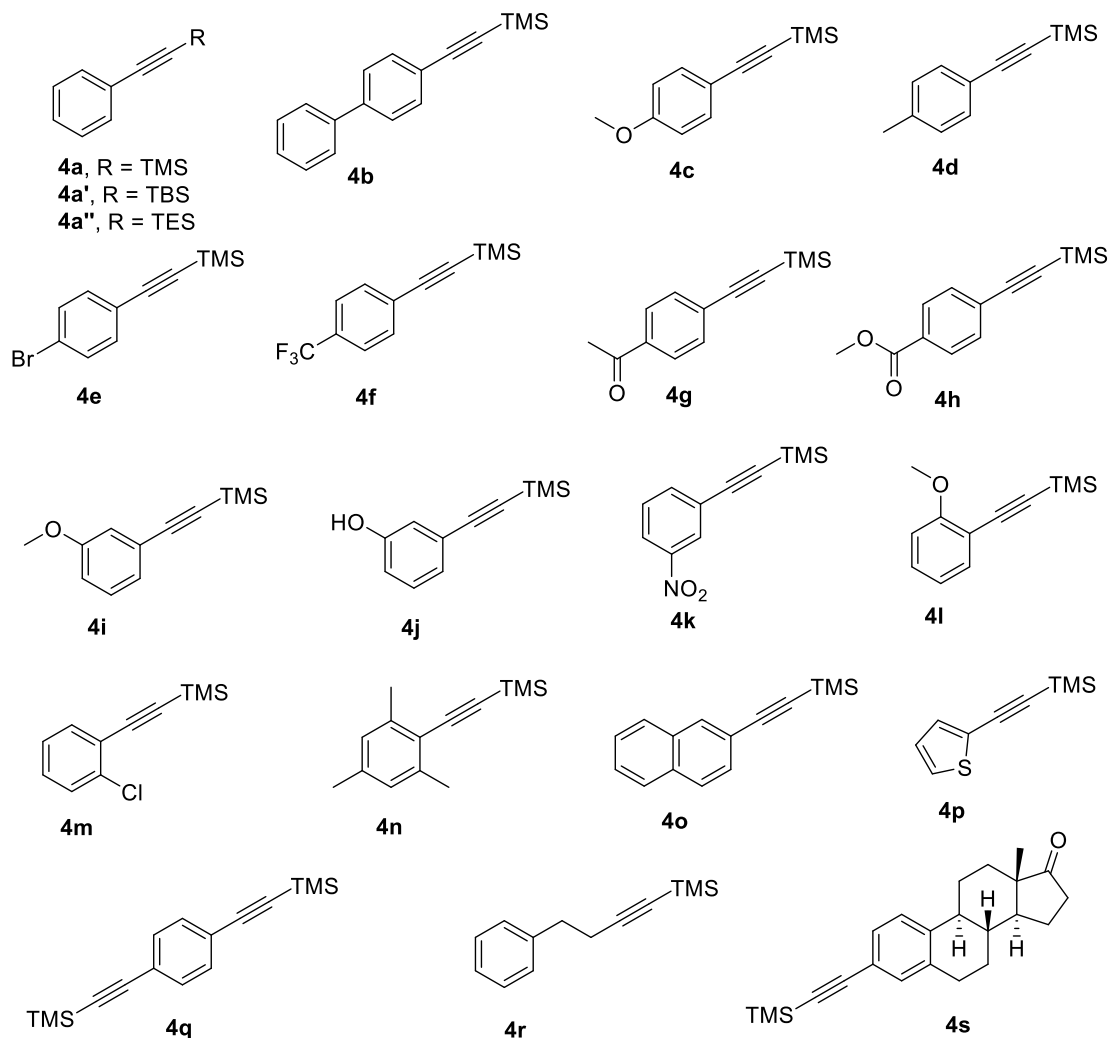

**4a**<sup>S9</sup>, **4a'**<sup>S10</sup>, **4a''**<sup>S11</sup>, **4b**<sup>S12</sup>, **4c**<sup>S5</sup>, **4d**<sup>S9</sup>, **4e**<sup>S12</sup>, **4f**<sup>S13</sup>, **4g**<sup>S14</sup>, **4h**<sup>S12</sup>, **4i**<sup>S13</sup>, **4j**<sup>S15</sup>, **4k**<sup>S16</sup>, **4l**<sup>S13</sup>, **4m**<sup>S17</sup>, **4n**<sup>S18</sup>, **4o**<sup>S13</sup>, **4p**<sup>S19</sup>, **4q**<sup>S13</sup>, **4r**<sup>S20</sup>, **4s**<sup>S5</sup> are known compounds and prepared according to the literatures.

## 4. Mechanistic Experiments

### 4.1 The experiment in anhydrous 1,4-Dioxane

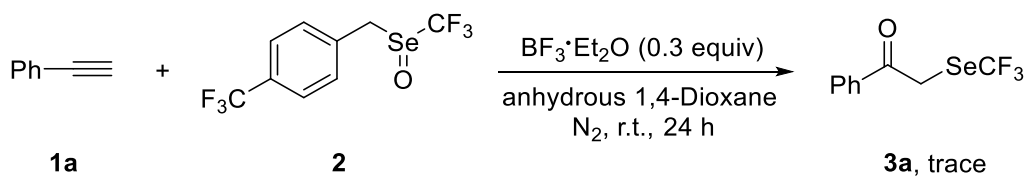

To a solution of trifluoromethyl selenoxide **2** (77.5mg, 0.24 mmol) and

phenylacetylene **1a** (22.0  $\mu\text{L}$ , 0.20 mmol) in anhydrous 1,4-Dioxane (2 mL),  $\text{BF}_3 \cdot \text{Et}_2\text{O}$  (7.4  $\mu\text{L}$ , 0.06 mmol) was added, then the reaction tube was capped with rubber septa and the reaction mixture was allowed to stir at room temperature for 24 h under  $\text{N}_2$  atmosphere. Subsequently, the  $^{19}\text{F}$  NMR yield was determined with *N,N*-dimethyltrifluoroacetamide as the internal standard and the desired product **3a** was found in trace

## 4.2 The experiment in anhydrous 1,4-Dioxane with 2.0 equiv of $\text{H}_2\text{O}$

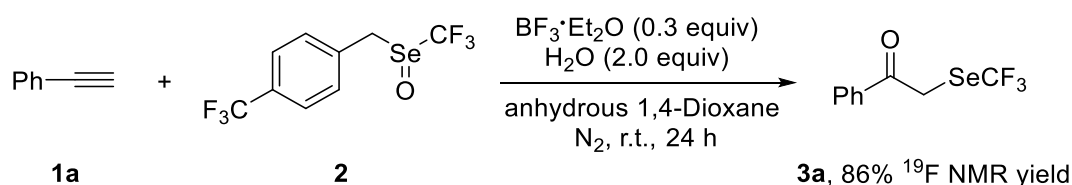

To a solution of trifluoromethyl selenoxide **2** (77.5mg, 0.24 mmol) and phenylacetylene **1a** (22.0  $\mu\text{L}$ , 0.20 mmol) in anhydrous 1,4-Dioxane (2 mL),  $\text{BF}_3 \cdot \text{Et}_2\text{O}$  (7.4  $\mu\text{L}$ , 0.06 mmol) and  $\text{H}_2\text{O}$  (7.2  $\mu\text{L}$ , 0.4 mmol) were added, then the reaction tube was capped with rubber septa and the reaction mixture was allowed to stir at room temperature for 24 h under  $\text{N}_2$  atmosphere. Subsequently, the  $^{19}\text{F}$  NMR yield was determined with *N,N*-dimethyltrifluoroacetamide as the internal standard and the desired product **3a** was detected in 86% yield.

## 4.3 Isotope labelling method

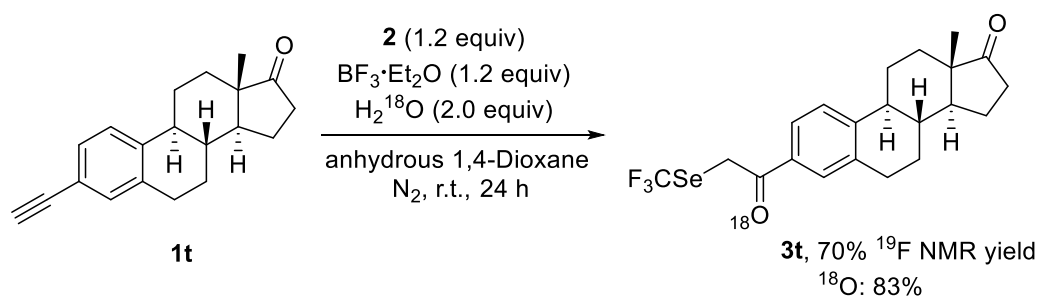

To a solution of trifluoromethyl selenoxide **2** (77.5mg, 0.24 mmol) and alkene **1t** (55.7mg, 0.20 mmol) in anhydrous 1,4-Dioxane (2 mL),  $\text{BF}_3 \cdot \text{Et}_2\text{O}$  (29.6  $\mu\text{L}$ , 0.24 mmol) and  $\text{H}_2^{18}\text{O}$  (8.0  $\mu\text{L}$ , 0.4 mmol) were added, then the reaction tube was capped with rubber septa and the reaction mixture was allowed to stir at room temperature for 24 h under  $\text{N}_2$  atmosphere. Subsequently, the  $^{19}\text{F}$  NMR yield was determined with *N,N*-dimethyltrifluoroacetamide as the internal standard. The desired product **3t** was detected in 70% yield and 83% of the oxygen of ketone was  $^{18}\text{O}$  labelled by high-efficiency resolution mass spectrometry (HRMS). The above result showed that the oxygen of ketone was from  $\text{H}_2\text{O}$ .

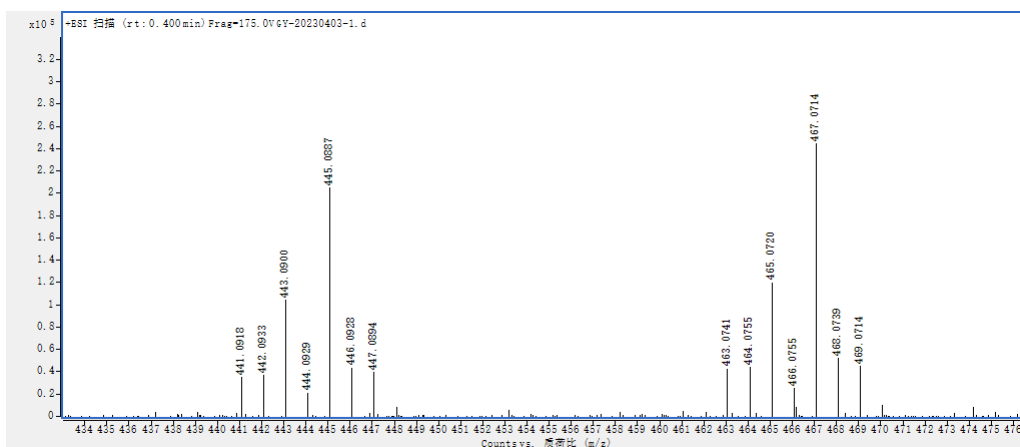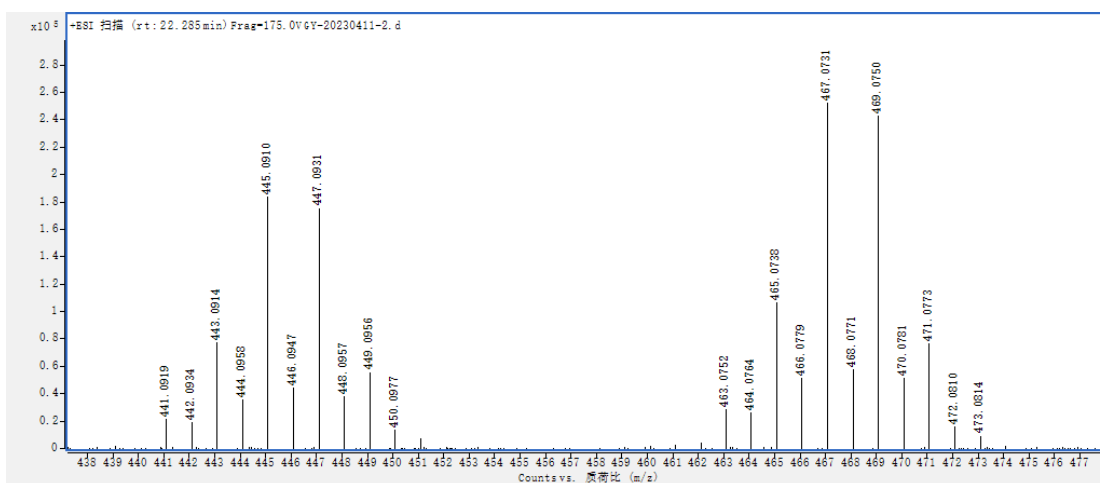



| 峰         | Abund            | 丰度百分比        | 最大丰度             | m/z             | Z        | 簇        |
|-----------|------------------|--------------|------------------|-----------------|----------|----------|
| 27        | 77099.55         | 10.66        | 77099.55         | 443.0914        | 1        | 3        |
| 28        | 35423.67         | 4.9          | 35423.67         | 444.0958        | 1        | 3        |
| 29        | 183709.7         | 25.39        | 183709.7         | 445.091         | 1        | 3        |
| 30        | 44303.4          | 6.12         | 44303.4          | 446.0947        | 1        | 3        |
| <b>31</b> | <b>175653.72</b> | <b>24.28</b> | <b>175653.72</b> | <b>447.0931</b> | <b>1</b> | <b>3</b> |
| 32        | 37788.32         | 5.22         | 37788.32         | 448.0957        | 1        | 3        |
| 33        | 55686.77         | 7.7          | 55686.77         | 449.0956        | 1        | 3        |
| 34        | 13473.98         | 1.86         | 13473.98         | 450.0977        | 1        | 3        |

computational process:

$$\frac{{}^{18}\text{O}_{\text{displaced}}}{{}^{18}\text{O}} = \frac{{}^{18}\text{O} - {}^{18}\text{O}_{\text{theoretical}}}{{}^{18}\text{O}} = \frac{175653.72 - (183709.7 - 77099.55 \times 51.27\%) \times 20.26\%}{175653.72} = 83\%$$

#### 4.4 The experiment of acetophenone with 2

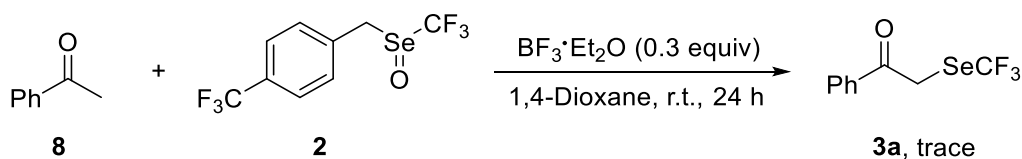

To a solution of trifluoromethyl selenoxide **2** (77.5mg, 0.24 mmol) and acetophenone **8** (24.0 mg, 0.20 mmol) in 1,4-Dioxane (2 mL),  $\text{BF}_3 \cdot \text{Et}_2\text{O}$  (7.4  $\mu\text{L}$ , 0.06 mmol) was added, then the reaction tube was capped with rubber septa and the reaction mixture was allowed to stir at room temperature for 24 h under air atmosphere. Subsequently, the  $^{19}\text{F}$  NMR yield was determined with *N,N*-dimethyltrifluoroacetamide as the internal standard and the desired product **3a** was found in trace.

## 5. General Procedure for the Trifluoromethylselenolation and Spectral Data

### 5.1 Trifluoromethylselenolation of Alkynes

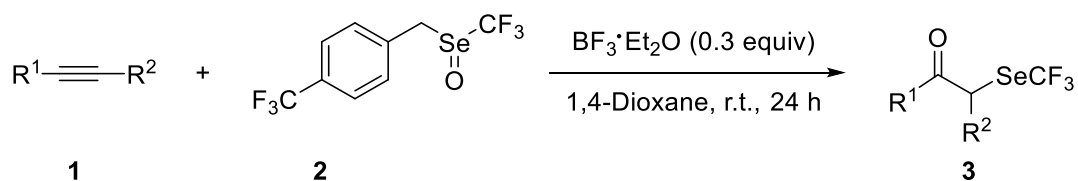

To a solution of trifluoromethyl selenoxide **2** (77.5 mg, 0.24 mmol) and alkynes **1** (0.20 mmol) in 1,4-Dioxane (2 mL),  $\text{BF}_3\cdot\text{Et}_2\text{O}$  (7.4  $\mu\text{L}$ , 0.06 mmol) was added, then the reaction tube was capped with rubber septa and the reaction mixture was allowed to stir at room temperature for 24 h under air atmosphere. Upon completion of the reaction monitored by TLC, water was added to quench the reaction. Then the reaction was extracted with ethyl acetate and the organic phase was washed with brine, and dried over  $\text{Na}_2\text{SO}_4$ . Subsequently, the organic solvent was removed under vacuum and the crude mixture was purified by flash column chromatography over silica gel (PE or PE/EA, PE: petroleum ether, EA: ethyl acetate) to give the desired product **3**.

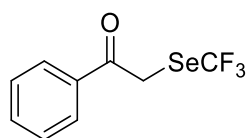

Compound **3a**, 50.9 mg, 95% yield, colorless liquid, PE/EA = 50:1 (v/v) as eluents for column chromatography.

$^1\text{H}$  NMR (400 MHz,  $\text{CDCl}_3$ )  $\delta$  7.96 (d,  $J = 7.3$  Hz, 2H), 7.64 (t,  $J = 7.4$  Hz, 1H), 7.51 (t,  $J = 7.7$  Hz, 2H), 4.63 (s, 2H).

$^{19}\text{F}$  NMR (377 MHz,  $\text{CDCl}_3$ )  $\delta$  -34.20 (s, 3F).

The characterization data was consistent with the previous report.<sup>S20</sup>

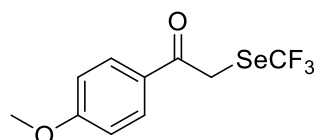

Compound **3b**, 47.7 mg, 80% yield, white solid, PE/EA = 50:1 (v/v) as eluents for column chromatography.

$^1\text{H}$  NMR (400 MHz,  $\text{CDCl}_3$ )  $\delta$  7.94 (d,  $J = 8.6$  Hz, 2H), 6.96 (d,  $J = 8.6$  Hz, 2H), 4.60 (s, 2H), 3.89 (s, 3H).

$^{19}\text{F}$  NMR (377 MHz,  $\text{CDCl}_3$ )  $\delta$  -34.22 (s, 3F).

The characterization data was consistent with the previous report.<sup>S20</sup>

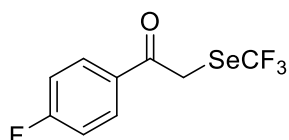

Compound **3c**, 42.3 mg, 74% yield, yellow solid, PE as eluents for column chromatography.

$^1\text{H}$  NMR (400 MHz,  $\text{CDCl}_3$ )  $\delta$  8.02 – 7.99 (m, 2H), 7.18 (t,  $J = 8.2$  Hz, 2H), 4.59 (s, 1H).

$^{19}\text{F}$  NMR (377 MHz,  $\text{CDCl}_3$ )  $\delta$  -34.18 (s, 3F), -102.74 (td,  $J = 8.0, 4.2$  Hz).

The characterization data was consistent with the previous report.<sup>S21</sup>

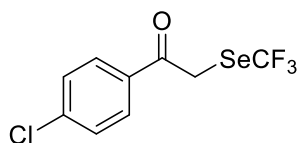

Compound **3d**, 47.7 mg, 79% yield, yellow solid, PE/ EA = 50:1 (v/v) as eluents for column chromatography.

$^1\text{H}$  NMR (400 MHz,  $\text{CDCl}_3$ )  $\delta$  7.91 (d,  $J = 8.4$  Hz, 2H), 7.49 (d,  $J = 8.4$  Hz, 2H), 4.57 (s, 2H).

$^{19}\text{F}$  NMR (377 MHz,  $\text{CDCl}_3$ )  $\delta$  -34.15 (s, 3F).

The characterization data was consistent with the previous report.<sup>S21</sup>

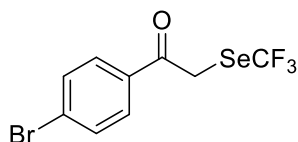

Compound **3e**, 55.4 mg, 80% yield, light yellow solid, PE as eluents for column chromatography.

$^1\text{H}$  NMR (400 MHz,  $\text{CDCl}_3$ )  $\delta$  7.82 (d,  $J = 8.4$  Hz, 2H), 7.65 (d,  $J = 8.4$  Hz, 2H), 4.56 (s, 2H).

$^{19}\text{F}$  NMR (377 MHz,  $\text{CDCl}_3$ )  $\delta$  -34.15 (s, 3F).

The characterization data was consistent with the previous report.<sup>S20</sup>

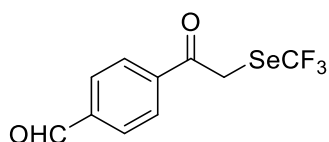

Compound **3f**, the reaction was conducted with 1.2 equiv of  $\text{BF}_3 \cdot \text{Et}_2\text{O}$ , 32.0 mg, 54% yield, light yellow liquid, PE/ EA = 15:1 as eluents for column chromatography.

$^1\text{H}$  NMR (400 MHz,  $\text{CDCl}_3$ )  $\delta$  10.13 (s, 1H), 8.12 (d,  $J = 8.3$  Hz, 2H), 8.02 (d,  $J = 8.2$  Hz, 2H), 4.62 (s, 2H).

$^{19}\text{F}$  NMR (377 MHz,  $\text{CDCl}_3$ )  $\delta$  -34.09 (s, 3F).

$^{13}\text{C}$  NMR (151 MHz,  $\text{CDCl}_3$ )  $\delta$  193.2, 191.4, 139.8, 138.9, 130.1, 129.3, 122.7 (q,  $J = 330.8$  Hz), 32.9.

HRMS (EI)  $m/z$ :  $[\text{M}]^+$  Calcd for  $\text{C}_{10}\text{H}_7\text{F}_3\text{O}_2\text{Se}^+$  295.9558, found 295.9554.

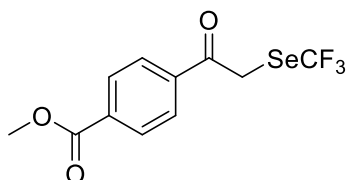

Compound **3g**, the reaction was conducted with 1.2 equiv of  $\text{BF}_3 \cdot \text{Et}_2\text{O}$ , 54.1 mg, 83% yield, light yellow liquid, PE/ EA = 50:1 (v/v) as eluents for column chromatography.

$^1\text{H}$  NMR (400 MHz,  $\text{CDCl}_3$ )  $\delta$  8.15 (d,  $J = 8.4$  Hz, 2H), 8.01 (d,  $J = 8.4$  Hz, 2H), 4.62 (s, 2H), 3.96 (s, 3H).

$^{13}\text{C}$  NMR (101 MHz,  $\text{CDCl}_3$ )  $\delta$  193.3, 166.0, 137.9, 135.0, 130.2, 128.7, 122.7 (q,  $J = 330.9$  Hz), 52.8, 33.0 (q,  $J = 2.0$  Hz).

$^{19}\text{F}$  NMR (377 MHz,  $\text{CDCl}_3$ )  $\delta$  -34.13 (s, 3F).

HRMS (EI)  $m/z$ :  $[\text{M}]^+$  Calcd for  $\text{C}_{11}\text{H}_9\text{F}_3\text{O}_3\text{Se}^+$  325.9664, found 325.9656.

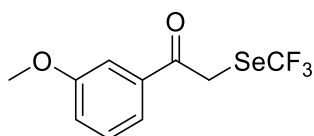

Compound **3h**, 43.5 mg, 73% yield, white solid, PE/ EA = 50:1 (v/v) as eluents for column chromatography.

$^1\text{H}$  NMR (400 MHz,  $\text{CDCl}_3$ )  $\delta$  7.52 (d,  $J = 7.6$  Hz, 1H), 7.47 (s, 1H), 7.41 (t,  $J = 7.9$  Hz, 1H), 7.17 (d,  $J = 8.2$  Hz, 1H), 4.60 (s, 2H), 3.86 (s, 3H).

$^{19}\text{F}$  NMR (377 MHz,  $\text{CDCl}_3$ )  $\delta$  -34.21 (s, 3F).

The characterization data was consistent with the previous report.<sup>S21</sup>

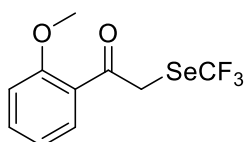

Compound **3i**, 41.7 mg, 70% yield, light yellow liquid, PE/ EA = 50:1 (v/v) as eluents for column chromatography.

$^1\text{H}$  NMR (400 MHz,  $\text{CDCl}_3$ )  $\delta$  7.93 (d,  $J = 7.7$  Hz, 1H), 7.57 (t,  $J = 7.8$  Hz, 1H), 7.08 (t,  $J = 7.5$  Hz, 1H), 7.02 (d,  $J = 8.4$  Hz, 1H), 4.50 (s, 2H), 3.97 (s, 3H).

$^{19}\text{F}$  NMR (377 MHz,  $\text{CDCl}_3$ )  $\delta$  -34.57 (s, 3F).

The characterization data was consistent with the previous report.<sup>S21</sup>

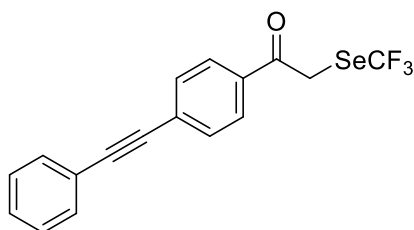

Compound **3j**, 45.6 mg, 62% yield, white solid, PE/ EA = 100:1 (v/v) as eluents for column chromatography.

$^1\text{H}$  NMR (400 MHz,  $\text{CDCl}_3$ )  $\delta$  7.95 (d,  $J = 8.6$  Hz, 2H), 7.64 (d,  $J = 8.6$  Hz, 2H), 7.57 – 7.55 (m, 2H), 7.40 – 7.37 (m, 3H), 4.63 (s, 2H).

$^{13}\text{C}$  NMR (151 MHz,  $\text{CDCl}_3$ )  $\delta$  192.9, 133.8, 132.1, 132.0, 129.6, 129.2, 128.7, 128.6, 122.9 (q,  $J = 330.9$  Hz), 122.5, 93.9, 88.5, 33.1.

$^{19}\text{F}$  NMR (377 MHz,  $\text{CDCl}_3$ )  $\delta$  -34.11 (s, 3F).

HRMS (EI)  $m/z$ :  $[\text{M}]^+$  Calcd for  $\text{C}_{17}\text{H}_{11}\text{F}_3\text{OSe}^+$  367.9922, found 367.9918.

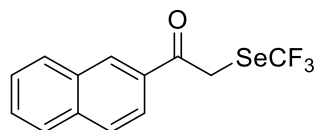

Compound **3k**, 47.1 mg, 74% yield, light yellow solid, PE/ EA = 100:1 (v/v) as eluents for column chromatography.

$^1\text{H}$  NMR (400 MHz,  $\text{CDCl}_3$ )  $\delta$  8.46 (s, 1H), 7.99 (t,  $J = 7.6$  Hz, 2H), 7.97 – 7.89 (m, 2H), 7.65 (t,  $J = 6.8$  Hz, 1H), 7.59 (t,  $J = 7.5$  Hz, 1H), 4.76 (s, 2H).

$^{19}\text{F}$  NMR (377 MHz,  $\text{CDCl}_3$ )  $\delta$  -34.08 (s, 3F).

The characterization data was consistent with the previous report.<sup>S21</sup>

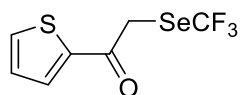

Compound **3l**, 26.3 mg, 48% yield, light yellow solid, PE/ EA = 50:1 (v/v) as eluents for column chromatography.

$^1\text{H}$  NMR (400 MHz,  $\text{CDCl}_3$ )  $\delta$  7.80 (dd,  $J = 3.8, 1.1$  Hz, 1H), 7.77 (dd,  $J = 4.9, 1.1$  Hz, 1H), 7.21 (dd,  $J = 4.9, 3.8$  Hz, 1H), 4.48 (s, 2H).

$^{19}\text{F}$  NMR (377 MHz,  $\text{CDCl}_3$ )  $\delta$  -34.26 (s, 3F).

The characterization data was consistent with the previous report.<sup>S22</sup>

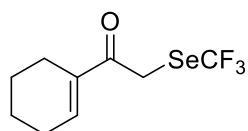

Compound **3m**, 32.1 mg, 59% yield, light yellow liquid, PE/ EA = 25:1 (v/v) as eluents for column chromatography.

$^1\text{H}$  NMR (400 MHz,  $\text{CDCl}_3$ )  $\delta$  6.98 (s, 1H), 4.35 (s, 2H), 2.29 – 2.25 (m, 4H), 1.65 – 1.63 (m, 4H).

$^{13}\text{C}$  NMR (151 MHz,  $\text{CDCl}_3$ )  $\delta$  194.5, 143.5, 138.3, 123.1 (q,  $J = 330.5$  Hz), 32.6, 26.4, 23.2, 21.8, 21.4.

$^{19}\text{F}$  NMR (377 MHz,  $\text{CDCl}_3$ )  $\delta$  -34.38 (s, 3F).

HRMS (EI)  $m/z$ :  $[\text{M}]^+$  Calcd for  $\text{C}_9\text{H}_{11}\text{F}_3\text{OSe}^+$  271.9922. Found 271.9920.

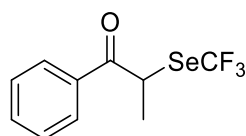

Compound **3n**, 42.3 mg, 75% yield, light yellow liquid, PE/ EA = 50:1 (v/v) as eluents for column chromatography.

$^1\text{H}$  NMR (400 MHz,  $\text{CDCl}_3$ )  $\delta$  7.97 (d,  $J = 7.6$  Hz, 2H), 7.63 (t,  $J = 7.4$  Hz, 1H), 7.51 (t,  $J = 7.6$  Hz, 2H), 5.13 (q,  $J = 7.1$  Hz, 1H), 1.92 (d,  $J = 7.1$  Hz, 3H).

$^{19}\text{F}$  NMR (377 MHz,  $\text{CDCl}_3$ )  $\delta$  -33.20 (s, 3F).

The characterization data was consistent with the previous report.<sup>S23</sup>

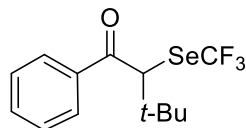

Compound **3o**, 34.40 mg, 53% yield, light yellow liquid, PE as eluents for column chromatography.

$^1\text{H}$  NMR (600 MHz,  $\text{CDCl}_3$ )  $\delta$  7.96 – 7.94 (m, 2H), 7.63 – 7.60 (m, 1H), 7.52 – 7.49 (m, 2H), 4.82 (s, 1H), 1.17 (s, 9H).

$^{13}\text{C}$  NMR (151 MHz,  $\text{CDCl}_3$ )  $\delta$  198.9, 136.8, 133.8, 129.1, 128.6, 122.8 (q,  $J = 331.3$  Hz), 55.2, 33.3, 28.4.

$^{19}\text{F}$  NMR (565 MHz,  $\text{CDCl}_3$ )  $\delta$  -33.39 (s, 3F).

MS (EI):  $m/z$  (%), 324.0 (1) ( $\text{M}^+$ ), 268.0 (4), 175.1 (5), 145.1 (2), 105.1 (100), 77.1 (22), 57.1 (4).

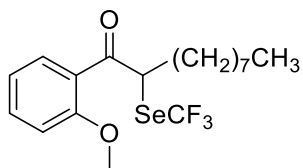

Compound **3p**, 45.9 mg, 56% yield, light yellow liquid, PE/ EA = 50:1 (v/v) as eluents for column chromatography.

$^1\text{H}$  NMR (400 MHz,  $\text{CDCl}_3$ )  $\delta$  7.71 (dd,  $J = 7.7, 1.7$  Hz, 1H), 7.52 – 7.47 (m, 1H), 7.05 – 7.01 (m, 1H), 6.98 (d,  $J = 8.4$  Hz, 1H), 5.12 (t,  $J = 7.0$  Hz, 1H), 3.91 (s, 3H), 2.27 – 7.17 (m, 1H), 2.04 – 1.95 (m, 1H), 1.48 – 1.40 (m, 2H), 1.35 – 1.23 (m, 10H), 0.87 (t,  $J = 6.9$  Hz, 3H).

$^{19}\text{F}$  NMR (377 MHz,  $\text{CDCl}_3$ )  $\delta$  -33.15 (s, 3F).

The characterization data was consistent with the previous report.<sup>S6</sup>

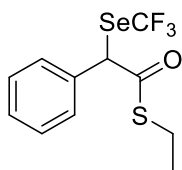

Compound **3q**, 28.2 mg, 43% yield, yellow liquid, PE/ EA = 150:1 (v/v) as eluents for column chromatography.

$^1\text{H}$  NMR (400 MHz,  $\text{CDCl}_3$ )  $\delta$  7.45 – 7.42 (m, 2H), 7.39 – 7.34 (m, 3H), 5.40 (s, 1H), 2.99 – 2.84 (m, 2H), 1.24 (t,  $J = 7.4$  Hz, 3H).

$^{13}\text{C}$  NMR (101 MHz,  $\text{CDCl}_3$ )  $\delta$  195.7, 135.0, 129.3, 129.1, 128.8, 122.8 (q,  $J = 332.2$  Hz), 55.5 (q,  $J = 1.5$  Hz), 24.8, 14.4.

$^{19}\text{F}$  NMR (377 MHz,  $\text{CDCl}_3$ )  $\delta$  -33.72 (s, 3F).

HRMS (EI)  $m/z$ :  $[\text{M}]^+$  Calcd for  $\text{C}_{11}\text{H}_{11}\text{F}_3\text{OSSe}^+$  327.9642, found 327.9637.

HMBC of **3q**: a strong correlation between H2 and C3, a weak correlation between H2 and C4. Meanwhile, H4 correlates with the carbons of phenyl ring; however, the protons of phenyl ring don't correlate with C3.



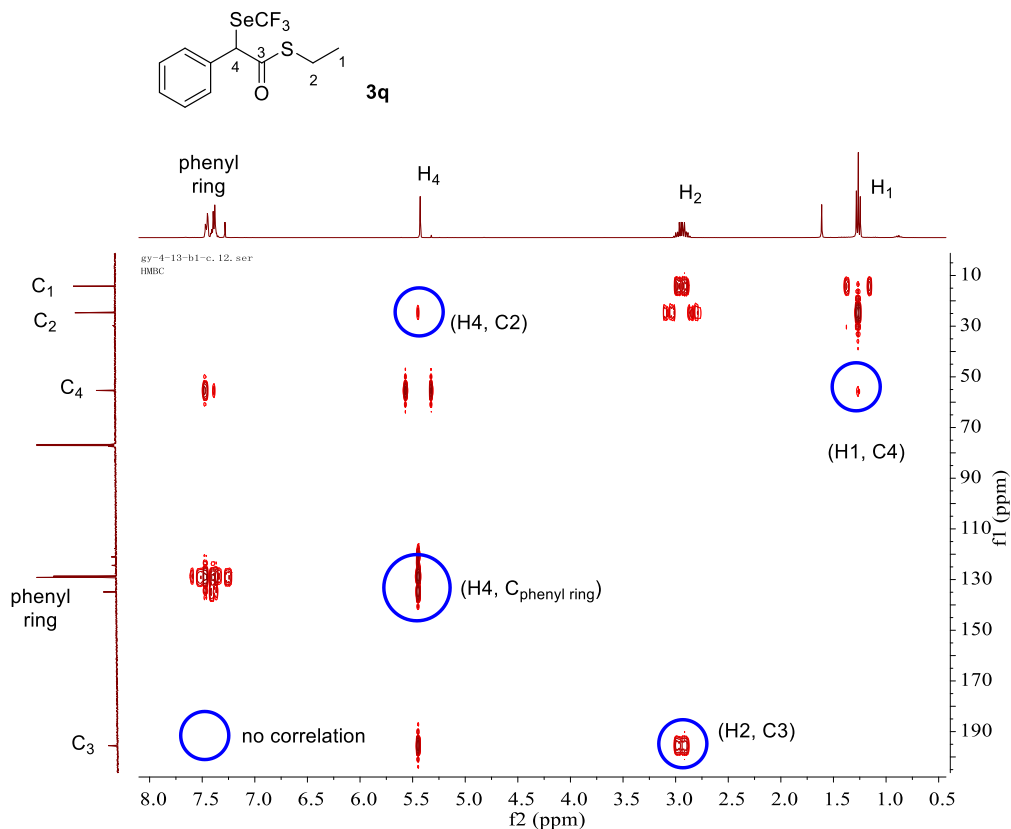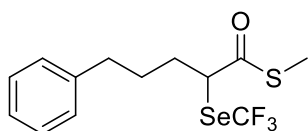

Compound **3r**, 47.7 mg, 67% yield, yellow liquid, PE/ EA = 100:1 (v/v) as eluents for column chromatography.

$^1\text{H}$  NMR (600 MHz,  $\text{CDCl}_3$ )  $\delta$  7.29 (t,  $J = 7.5$  Hz, 2H), 7.20 (t,  $J = 7.4$  Hz, 1H), 7.16 (d,  $J = 7.0$  Hz, 2H), 4.06 (dd,  $J = 8.2, 6.6$  Hz, 1H), 2.66 (t,  $J = 7.7$  Hz, 2H), 2.37 (s, 3H), 2.15 – 2.08 (m, 1H), 2.01 – 1.94 (m, 1H), 1.83 – 1.71 (m, 2H).

$^{13}\text{C}$  NMR (101 MHz,  $\text{CDCl}_3$ )  $\delta$  198.1, 141.3, 128.6, 128.5, 126.2, 122.6 (q,  $J = 331.7$  Hz), 50.6 (q,  $J = 1.5$  Hz), 35.3, 32.8, 29.4, 12.4.

$^{19}\text{F}$  NMR (377 MHz,  $\text{CDCl}_3$ )  $\delta$  -33.30 (s, 3F).

HRMS (EI)  $m/z$ :  $[\text{M}-\text{CH}_3\text{SH}]^+$  Calcd for  $\text{C}_{12}\text{H}_{11}\text{F}_3\text{O}^{76}\text{Se}^+$  303.9949, found 303.9947.

HSQC of **3r**: the correlations between H3 and H4, H3 and H4', H6 and H5, H4 and H5, H4' and H5, support the structure of **3r**.

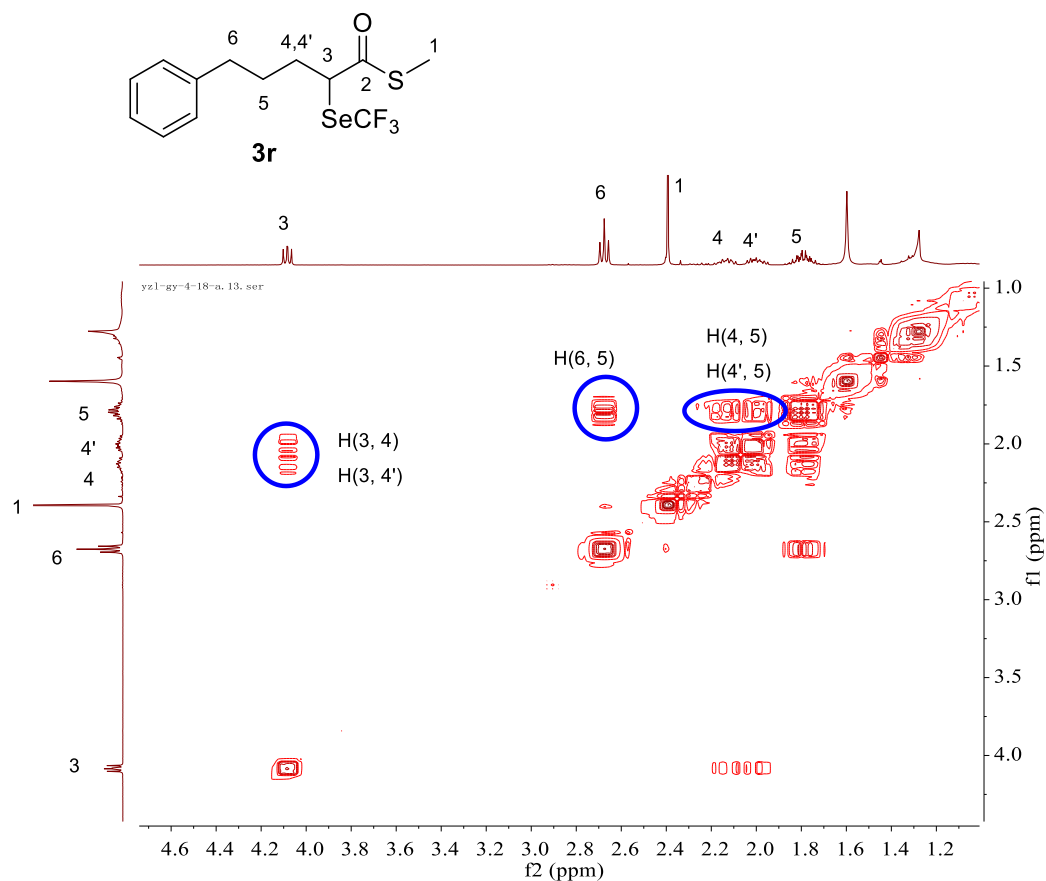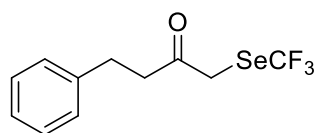

Compound **3s**, 33.7 mg, 57% yield, yellow liquid, PE/ EA = 100:1 (v/v) as eluents for column chromatography.

<sup>1</sup>H NMR (600 MHz, CDCl<sub>3</sub>) δ 7.30 (t, *J* = 7.5 Hz, 2H), 7.22 (t, *J* = 7.4 Hz, 1H), 7.19 (d, *J* = 8.2 Hz, 2H), 3.85 (s, 2H), 2.95 (s, 4H).

<sup>19</sup>F NMR (565 MHz, CDCl<sub>3</sub>) δ -34.30 (s, 3F).

The characterization data was consistent with the previous report.<sup>S23</sup>

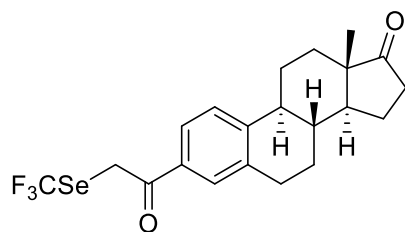

Compound **3t**, the reaction was conducted with 1.2 equiv of  $\text{BF}_3 \cdot \text{Et}_2\text{O}$ , 71.0 mg, 80% yield, white solid, PE/EA = 100:1 (v/v) as eluents for column chromatography.

$^1\text{H}$  NMR (400 MHz,  $\text{CDCl}_3$ )  $\delta$  7.72 (dd,  $J = 8.2, 1.6$  Hz, 1H), 7.68 (s, 1H), 7.41 (d,  $J = 8.2$  Hz, 1H), 4.60 (s, 2H), 2.99 – 2.95 (m, 2H), 2.55 – 2.48 (m, 1H), 2.47 – 2.42 (m, 1H), 2.38 – 2.31 (m, 1H), 2.20 – 2.13 (m, 1H), 2.11 – 2.05 (m, 2H), 2.00 – 1.96 (m, 1H), 1.73 – 1.67 (m, 2H), 1.59 – 1.44 (m, 4H), 0.92 (s, 3H).

$^{13}\text{C}$  NMR (101 MHz,  $\text{CDCl}_3$ )  $\delta$  220.6, 193.5, 147.0, 137.6, 132.4, 129.3, 126.12, 126.07, 122.9 (q,  $J = 330.8$  Hz), 50.6, 48.0, 44.9, 37.8, 35.9, 33.3 (q,  $J = 1.6$  Hz), 31.6, 29.4, 26.3, 25.6, 21.7, 13.9.

$^{19}\text{F}$  NMR (377 MHz,  $\text{CDCl}_3$ )  $\delta$  -34.14 (s, 3F).

HRMS (ESI)  $m/z$ :  $[\text{M} + \text{H}]^+$  Calcd for  $\text{C}_{21}\text{H}_{24}\text{F}_3\text{O}_2\text{Se}^+$  445.0888. Found 445.0887.

## 5.2 Trifluoromethylselenolation of Trimethylsilylacetylenes

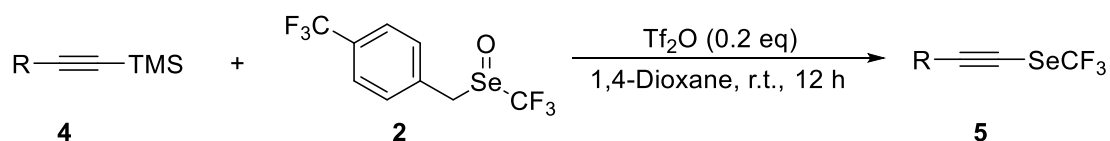

To a solution of trifluoromethyl selenoxide **2** (64.6 mg, 0.20 mmol) and trimethylsilylacetylenes **4** (0.20 mmol) in 1,4-Dioxane (2 mL),  $\text{Tf}_2\text{O}$  (6.7  $\mu\text{L}$ , 0.04 mmol) was added, then the reaction tube was capped with rubber septa and the reaction mixture was allowed to stir at room temperature for 12 h under air atmosphere. Upon completion of the reaction monitored by TLC, water was added to quench the reaction. Then the reaction was extracted with ethyl acetate and the organic phase was washed with brine, and dried over  $\text{Na}_2\text{SO}_4$ . Subsequently, the organic solvent was removed under vacuum and the crude mixture was purified by flash column chromatography over silica gel (PE or PE/EA, PE: petroleum ether, EA: ethyl acetate) to give the desired product **5**.

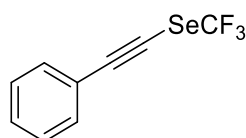

Compound **5a**, 38.4 mg, 77% yield, colourless liquid, PE/ EA = 100:1 (v/v) as eluents for column chromatography.

$^1\text{H}$  NMR (400 MHz,  $\text{CDCl}_3$ )  $\delta$  7.50 – 7.49 (m, 2H), 7.40 – 7.33 (m, 3H).

$^{19}\text{F}$  NMR (377 MHz,  $\text{CDCl}_3$ )  $\delta$  -36.39 (s, 3F).

The characterization data was consistent with the previous report.<sup>S24</sup>

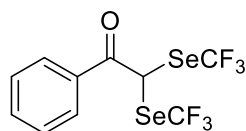

Compound **5a'**, colourless liquid, PE/ EA = 50:1 (v/v) as eluents for column chromatography.

$^1\text{H}$  NMR (400 MHz,  $\text{CDCl}_3$ )  $\delta$  7.97 – 7.95 (m, 2H), 7.70 – 7.66 (m, 1H), 7.56 – 7.52 (m, 2H), 6.34 (s, 1H).

$^{13}\text{C}$  NMR (101 MHz,  $\text{CDCl}_3$ )  $\delta$  192.4, 135.0, 132.4, 129.3, 129.2, 122. (q,  $J$  = 333.7 Hz), 38.0.

$^{19}\text{F}$  NMR (377 MHz,  $\text{CDCl}_3$ )  $\delta$  -33.93 (s, 6F).

HRMS (EI)  $m/z$ :  $[\text{M}]^+$  Calcd for  $\text{C}_{10}\text{H}_6\text{F}_6\text{OSe}_2^+$  415.8648. Found 415.8646.

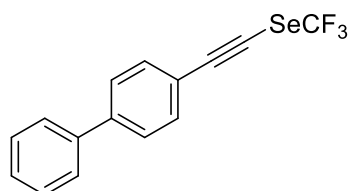

Compound **5b**, 59.3 mg, 91% yield, light yellow solid, PE as eluents for column chromatography.

$^1\text{H}$  NMR (400 MHz,  $\text{CDCl}_3$ )  $\delta$  7.62 – 7.56 (m, 6H), 7.47 (t,  $J$  = 7.5 Hz, 2H), 7.39 (t,  $J$  = 7.3 Hz, 1H).

$^{19}\text{F}$  NMR (377 MHz,  $\text{CDCl}_3$ )  $\delta$  -36.10 (s, 3F).

The characterization data was consistent with the previous report.<sup>S25</sup>

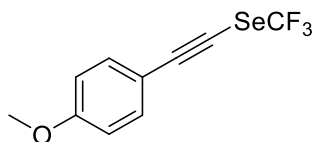

Compound **5c**, 23.5 mg, 42% yield, white solid, PE as eluents for column chromatography.

$^1\text{H}$  NMR (400 MHz,  $\text{CDCl}_3$ )  $\delta$  7.45 (d,  $J = 8.8$  Hz, 2H), 6.87 (d,  $J = 8.8$  Hz, 2H), 3.83 (s, 3H).

$^{19}\text{F}$  NMR (377 MHz,  $\text{CDCl}_3$ )  $\delta$  -36.52 (s, 3F).

The characterization data was consistent with the previous report.<sup>S24</sup>

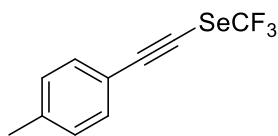

Compound **5d**, 39.5 mg, 75% yield, white solid, PE as eluents for column chromatography.

$^1\text{H}$  NMR (400 MHz,  $\text{CDCl}_3$ )  $\delta$  7.39 (d,  $J = 8.0$  Hz, 2H), 7.16 (d,  $J = 8.0$  Hz, 2H), 2.37 (s, 3H).

$^{19}\text{F}$  NMR (377 MHz,  $\text{CDCl}_3$ )  $\delta$  -36.33 (s, 3F).

The characterization data was consistent with the previous report.<sup>S25</sup>

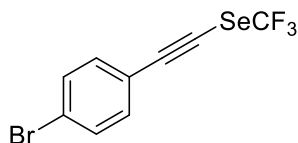

Compound **5e**, 55.8 mg, 85% yield, light yellow liquid, PE as eluents for column chromatography.

$^1\text{H}$  NMR (400 MHz,  $\text{CDCl}_3$ )  $\delta$  7.49 (d,  $J = 8.4$  Hz, 2H), 7.34 (d,  $J = 8.4$  Hz, 2H).

$^{19}\text{F}$  NMR (377 MHz,  $\text{CDCl}_3$ )  $\delta$  -35.90 (s, 3F).

The characterization data was consistent with the previous report.<sup>S24</sup>

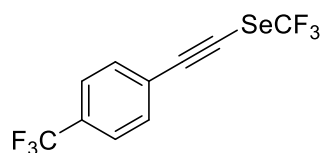

Compound **5f**, 51.5 mg, 81% yield, light yellow liquid, PE as eluents for column chromatography.

$^1\text{H}$  NMR (400 MHz,  $\text{CDCl}_3$ )  $\delta$  7.64 – 7.56 (m, 4H).

$^{19}\text{F}$  NMR (377 MHz,  $\text{CDCl}_3$ )  $\delta$  -35.7 (s, 3F), -63.0 (s, 3F).

The characterization data was consistent with the previous report.<sup>S25</sup>

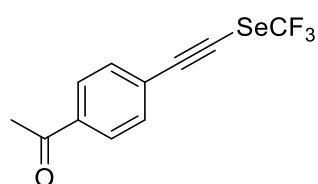

Compound **5g**, 54.9 mg, 94% yield, yellow liquid, PE as eluents for column chromatography.

$^1\text{H}$  NMR (400 MHz,  $\text{CDCl}_3$ )  $\delta$  7.92 (d,  $J$  = 8.4 Hz, 2H), 7.54 (d,  $J$  = 8.4 Hz, 2H), 2.60 (s, 3H).

$^{19}\text{F}$  NMR (377 MHz,  $\text{CDCl}_3$ )  $\delta$  -35.70 (s, 3F).

The characterization data was consistent with the previous report.<sup>S24</sup>

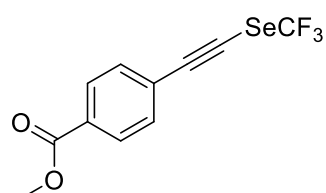

Compound **5h**, 55.4 mg, 90% yield, light yellow solid, PE/ EA = 100:1 (v/v) as eluents for column chromatography.

$^1\text{H}$  NMR (400 MHz,  $\text{CDCl}_3$ )  $\delta$  8.03 (d,  $J$  = 8.4 Hz, 2H), 7.55 (d,  $J$  = 8.4 Hz, 2H), 3.94 (s, 3H).

$^{19}\text{F}$  NMR (377 MHz,  $\text{CDCl}_3$ )  $\delta$  -35.75 (s, 3F).

The characterization data was consistent with the previous report.<sup>S24</sup>

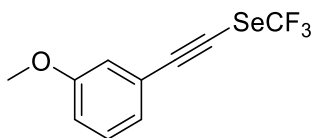

Compound **5i**, 39.8 mg, 71% yield, white liquid, PE as eluents for column chromatography.

$^1\text{H}$  NMR (400 MHz,  $\text{CDCl}_3$ )  $\delta$  7.51 (t,  $J = 8.0$  Hz, 1H), 7.34 (d,  $J = 8.0$  Hz, 1H), 7.26 (s, 1H), 7.19 (d,  $J = 8.0$  Hz, 1H), 4.07 (s, 3H).

$^{13}\text{C}$  NMR (151 MHz,  $\text{CDCl}_3$ )  $\delta$  159.5, 129.7, 124.7, 123.0, 120.8 (q,  $J = 336.4$  Hz), 116.8, 116.4, 107.2, 61.8 (q,  $J = 3.2$  Hz), 55.5.

$^{19}\text{F}$  NMR (377 MHz,  $\text{CDCl}_3$ )  $\delta$  -36.09 (s, 3F).

HRMS (EI)  $m/z$ :  $[\text{M}]^+$  Calcd for  $\text{C}_{10}\text{H}_7\text{F}_3\text{OSe}^+$  279.9609, found 279.9593.

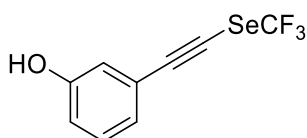

Compound **5j**, 35.1 mg, 66% yield, brown liquid, PE/ EA = 100:1 (v/v) as eluents for column chromatography.

$^1\text{H}$  NMR (400 MHz,  $\text{CDCl}_3$ )  $\delta$  7.22 (t,  $J = 7.9$  Hz, 1H), 7.07 (dt,  $J = 7.6, 1.2$  Hz, 1H), 6.95 (dd,  $J = 2.4, 1.4$  Hz, 1H), 6.87 (ddd,  $J = 8.2, 2.6, 0.9$  Hz, 1H).

$^{19}\text{F}$  NMR (377 MHz,  $\text{CDCl}_3$ )  $\delta$  -36.05 (s, 3F).

The characterization data was consistent with the previous report.<sup>S26</sup>

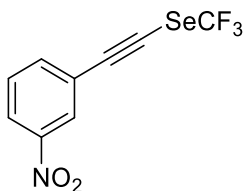

Compound **5k**, 30.1 mg, 51% yield, yellow liquid, PE as eluents for column chromatography.

$^1\text{H}$  NMR (400 MHz,  $\text{CDCl}_3$ )  $\delta$  8.33 – 8.32 (m, 1H), 8.23 (ddd,  $J = 8.0, 2.3, 1.3$  Hz, 1H), 7.78 (dt,  $J = 8.0, 1.3$  Hz, 1H), 7.55 (t,  $J = 8.0$  Hz, 1H).

$^{13}\text{C}$  NMR (151 MHz,  $\text{CDCl}_3$ )  $\delta$  148.2, 137.5, 129.7, 126.8, 124.2, 123.8, 120.7 (q,  $J = 336.6$  Hz), 104.7, 65.8 (q,  $J = 3.0$  Hz).

$^{19}\text{F}$  NMR (377 MHz,  $\text{CDCl}_3$ )  $\delta$  -35.36 (s, 3F).

HRMS (EI)  $m/z$ :  $[\text{M}]^+$  Calcd for  $\text{C}_9\text{H}_4\text{F}_3\text{NO}_2\text{Se}^+$  294.9354, found 294.9354.

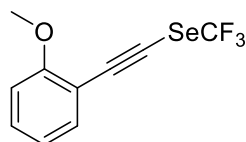

Compound **5l**, 48.2 mg, 86% yield, light yellow liquid, PE as eluents for column chromatography.

$^1\text{H}$  NMR (400 MHz,  $\text{CDCl}_3$ )  $\delta$  7.44 (d,  $J = 7.6$  Hz, 1H), 7.33 (t,  $J = 7.9$  Hz, 1H), 6.94 – 6.87 (m, 2H), 3.88 (s, 3H).

$^{19}\text{F}$  NMR (377 MHz,  $\text{CDCl}_3$ )  $\delta$  -36.35 (s, 3F).

The characterization data was consistent with the previous report.<sup>S24</sup>

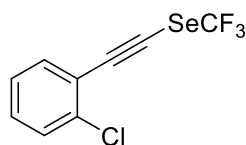

Compound **5m**, 50.6 mg, 89% yield, light yellow liquid, PE/ EA = 100:1 (v/v) as eluents for column chromatography.

$^1\text{H}$  NMR (400 MHz,  $\text{CDCl}_3$ )  $\delta$  7.50 (dd,  $J = 7.6, 1.8$  Hz, 1H), 7.42 (dd,  $J = 8.0, 1.1$  Hz, 1H), 7.30 (td,  $J = 7.8, 1.8$  Hz, 1H), 7.26 – 7.22 (m, 1H).

$^{19}\text{F}$  NMR (377 MHz,  $\text{CDCl}_3$ )  $\delta$  -35.73 (s, 3F).

The characterization data was consistent with the previous report.<sup>S24</sup>

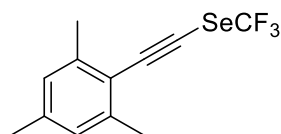

Compound **5n**, 48.5 mg, 83% yield, yellow liquid, PE as eluents for column chromatography.

$^1\text{H}$  NMR (400 MHz,  $\text{CDCl}_3$ )  $\delta$  6.88 (s, 2H), 2.40 (s, 6H), 2.30 (s, 3H).



$^{13}\text{C}$  NMR (101 MHz,  $\text{CDCl}_3$ )  $\delta$  141.2, 139.2, 127.8, 121.0 (q,  $J = 336.4$  Hz), 119.1, 105.6, 68.1 (q,  $J = 2.8$  Hz), 21.5, 20.9.

$^{19}\text{F}$  NMR (377 MHz,  $\text{CDCl}_3$ )  $\delta$  -36.75 (s, 3F).

HRMS (EI)  $m/z$ :  $[\text{M}]^+$  Calcd for  $\text{C}_{12}\text{H}_{11}\text{F}_3^{76}\text{Se}^+$  288.0000, found 287.9995.

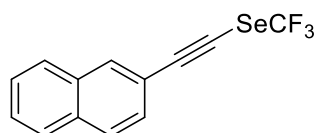

Compound **5o**, 56.8 mg, 95% yield, light yellow solid, PE as eluents for column chromatography.

$^1\text{H}$  NMR (400 MHz,  $\text{CDCl}_3$ )  $\delta$  8.04 (s, 1H), 7.84 – 7.80 (m, 3H), 7.55 – 7.50 (m, 3H).

$^{13}\text{C}$  NMR (101 MHz,  $\text{CDCl}_3$ )  $\delta$  133.5, 132.9, 132.7, 128.34, 128.27, 128.1, 128.0, 127.5, 127.0, 120.9 (q,  $J = 336.5$  Hz), 119.4, 107.7 (q,  $J = 1.5$  Hz), 62.2 (q,  $J = 3.0$  Hz).

$^{19}\text{F}$  NMR (377 MHz,  $\text{CDCl}_3$ )  $\delta$  -36.05 (s, 3F).

HRMS (EI)  $m/z$ :  $[\text{M}]^+$  Calcd for  $\text{C}_{13}\text{H}_7\text{F}_3\text{Se}^+$  299.9660, found 299.9656.

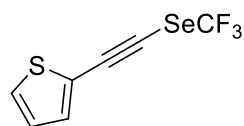

Compound **5p**, 26.1 mg, 51% yield, light yellow liquid, PE as eluents for column chromatography.

$^1\text{H}$  NMR (400 MHz,  $\text{CDCl}_3$ )  $\delta$  7.39 – 7.35 (m, 2H), 7.02 (dd,  $J = 5.1, 3.7$  Hz, 1H).

$^{19}\text{F}$  NMR (377 MHz,  $\text{CDCl}_3$ )  $\delta$  -36.16 (s, 3F).

The characterization data was consistent with the previous report.<sup>S25</sup>

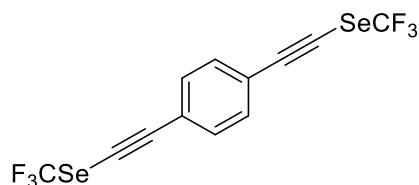

Compound **5q**, the reaction was conducted with 0.4 equiv of  $\text{Tf}_2\text{O}$  and 2.0 equiv of **2**. 77.7 mg, 92% yield, white solid, PE as eluents for column chromatography.

$^1\text{H}$  NMR (400 MHz,  $\text{CDCl}_3$ )  $\delta$  7.45 (s, 4H).

$^{13}\text{C}$  NMR (101 MHz,  $\text{CDCl}_3$ )  $\delta$  132.0, 123.0, 120.8 (q,  $J = 336.5$  Hz), 106.5 (q,  $J = 1.5$  Hz), 64.9 (q,  $J = 3.0$  Hz).

$^{19}\text{F}$  NMR (377 MHz,  $\text{CDCl}_3$ )  $\delta$  -35.83 (s, 3F).

HRMS (EI)  $m/z$ :  $[\text{M}]^+$  Calcd for  $\text{C}_{12}\text{H}_4\text{F}_6\text{Se}_2^+$  421.8542. Found 421.8544.

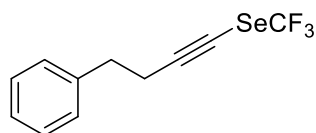

Compound **5r**, 43.4 mg, 78% yield, white liquid, PE as eluents for column chromatography.

$^1\text{H}$  NMR (400 MHz,  $\text{CDCl}_3$ )  $\delta$  7.34 – 7.30 (m, 2H), 7.26 – 7.22 (m, 2H), 2.89 (t,  $J = 7.4$  Hz, 2H), 2.73 (t,  $J = 7.4$  Hz, 2H).

$^{13}\text{C}$  NMR (101 MHz,  $\text{CDCl}_3$ )  $\delta$  140.1, 128.61, 128.58, 126.6, 120.9 (q,  $J = 335.7$  Hz), 108.6 (q,  $J = 1.5$  Hz), 52.4 (q,  $J = 3.1$  Hz), 34.7, 22.8.

$^{19}\text{F}$  NMR (377 MHz,  $\text{CDCl}_3$ )  $\delta$  -36.61 (s, 3F).

HRMS (EI)  $m/z$ :  $[\text{M}]^+$  Calcd for  $\text{C}_{11}\text{H}_9\text{F}_3\text{Se}^+$  277.9816. Found 277.9808.

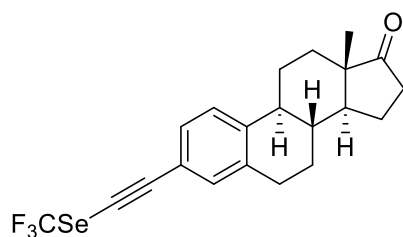

Compound **5s**, 76.6 mg, 90% yield, white solid, PE/ EA = 25:1 (v/v) as eluents for column chromatography.

$^1\text{H}$  NMR (400 MHz,  $\text{CDCl}_3$ )  $\delta$  7.29 – 7.28 (m, 2H), 7.26 (s, 1H), 2.92 – 2.90 (m, 2H), 2.56 – 2.50 (m, 1H), 2.45 – 2.40 (m, 1H), 2.37 – 2.29 (m, 1H), 2.21 – 1.98 (m, 4H), 1.69-1.43 (m, 6H), 0.93 (s, 3H).

$^{13}\text{C}$  NMR (101 MHz,  $\text{CDCl}_3$ )  $\delta$  220.8, 141.9, 137.0, 132.7, 120.0, 125.6, 120.8 (q,  $J = 336.4$  Hz), 119.4, 107.5, 61.1 (q,  $J = 3.0$  Hz), 50.6, 48.0, 44.6, 38.0, 36.0, 31.6, 29.2, 26.4, 25.7, 21.7, 13.9.



organic phase was washed with brine, and dried over Na<sub>2</sub>SO<sub>4</sub>. Subsequently, the organic solvent was removed under vacuum and the crude mixture was purified by flash column chromatography over silica gel (PE) to give the desired product **5b** in 83% yield.

## 7. Applications

### 7.1 The reduction of **3a**<sup>S27</sup>

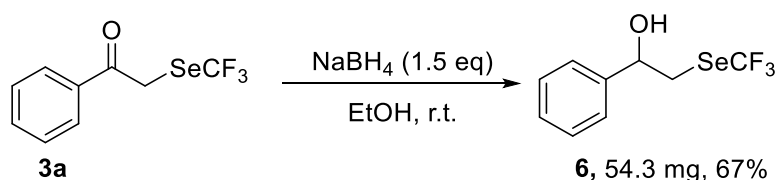

To a solution of **3a** (80.4 mg, 0.30 mmol) in EtOH (3 mL), NaBH<sub>4</sub> (17.0 mg, 0.45 mmol) was added in portion wise at room temperature. The reaction mixture was stirred at room temperature. Upon completion of the reaction monitored by TLC, the solvent was removed under vacuum and the residue was purified by column chromatography (PE/ EA = 25:1) to give the desired product **6** as colorless oil.

<sup>1</sup>H NMR (400 MHz, CDCl<sub>3</sub>) δ 7.42 – 7.32 (m, 5H), 4.97 (dd, *J* = 8.1, 4.9 Hz, 1H), 3.32 – 3.23 (m, 2H), 2.64 (brs, 1H).

<sup>13</sup>C NMR (151 MHz, CDCl<sub>3</sub>) δ 142.1, 128.9, 128.6, 125.8, 122.7 (q, *J* = 330.5 Hz), 73.2, 34.4.

<sup>19</sup>F NMR (377 MHz, CDCl<sub>3</sub>) δ -34.10 (s, 3F).

HRMS (EI) *m/z*: [M-H<sub>2</sub>O]<sup>+</sup> Calcd for C<sub>9</sub>H<sub>7</sub>F<sub>3</sub><sup>76</sup>Se<sup>+</sup> 247.9687, found 247.9691.

### 7.2 Trifluoromethylselenolation of **5b**

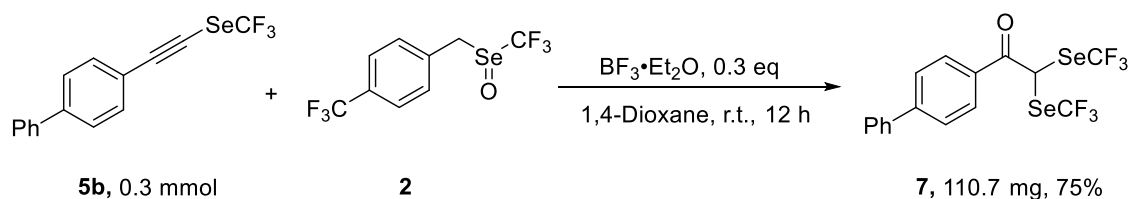

To a solution of trifluoromethyl selenoxide **2** (116.6 mg, 0.36 mmol) and **5b** (97.8

mg, 0.3 mmol) in 1,4-Dioxane (3 mL),  $\text{BF}_3 \cdot \text{Et}_2\text{O}$  (11.0  $\mu\text{L}$ , 0.09 mmol) was added, then the reaction tube was capped with rubber septa and the reaction mixture was allowed to stir at room temperature for 24 h under air atmosphere. Upon completion of the reaction monitored by TLC, water was added to quench the reaction. Then the reaction was extracted with ethyl acetate and the organic phase was washed with brine, and dried over  $\text{Na}_2\text{SO}_4$ . Subsequently, the organic solvent was removed under vacuum and the crude mixture was purified by flash column chromatography over silica gel (PE/ EA = 50:1) to give the desired product **7** as colorless oil.

$^1\text{H}$  NMR (400 MHz,  $\text{CDCl}_3$ )  $\delta$  8.04 (d,  $J = 8.5$  Hz, 2H), 7.76 (d,  $J = 8.6$  Hz, 2H), 7.66 – 7.64 (m, 2H), 7.52 – 7.48 (m, 2H), 7.46 – 7.42 (m, 1H), 6.37 (s, 1H).

$^{13}\text{C}$  NMR (101 MHz,  $\text{CDCl}_3$ )  $\delta$  191.9, 147.8, 139.4, 130.9, 129.9, 129.2, 128.9, 127.9, 127.5, 122.8 (q,  $J = 333.8$  Hz), 38.1.

$^{19}\text{F}$  NMR (377 MHz,  $\text{CDCl}_3$ )  $\delta$  -34.10 (s, 6F).

HRMS (EI)  $m/z$ :  $[\text{M}]^+$  Calcd for  $\text{C}_{16}\text{H}_{10}\text{F}_6\text{OSe}_2^+$  491.8961, found 491.8971.

## 8. References

- S1 Y. Li, Y. Wang, Z. Ye, S. Zhang, X. Ye, Z. Yuan, *Org. Lett.* **2022**, *24*, 3009-3013.
- S2 J. Tummatorn, K. Punjajom, W. Rodphon, S. Ruengsangtongkul, N. Chaisan, K. Lumyong, C. Thongsornkleeb, P. Nimmual, S. Ruchirawat, *Org. Lett.* **2019**, *21*, 4694-4697.
- S3 H-J. Huang, Y-T. Wang, Y-K. Wu, I. Ryu, *Org. Chem. Front.* **2020**, *7*, 1266-1270.
- S4 G. Choi, Ha. Kim, S. Hwang, H. Jang, W-j. Chung, *Org. Lett.* **2020**, *22*, 4190-4195.
- S5 Z-F. Xu, H. Dai, L. Shan, C-Y. Li, *Org. Lett.* **2018**, *20*, 1054-1057.
- S6 S. Zhang, Y. Gao, R. Xiao, Y. Li, Y. Wang, Z. Yuan, *Chem. Eur. J.* **2023**, DOI: 10.1002/chem.202301283.
- S7 X-Q. Zhu, Q. Sun, Z-X. Zhang, B. Zhou, P-X. Xie, W-B. Shen, X. Lu, J-M Zhou, L-W. Ye, *Chem. Commun.* **2018**, *54*, 7435-7438.
- S8 W. Xie, S. Liu, *Appl Organomet Chem.* **2023**, *37*, e6951.

- S9 A. Boelke, L. D. Caspers, B. J. Nachtsheim, *Org. Lett.* **2017**, *19*, 5344-5347.
- S10 T. J. Thomas, B. A. Merritt, B. E. Lemma, A. M. McKoy, T. Nguyen, A. K. Swenson, J. L. Mills, M. G. Coleman, *Org. Biomol. Chem.* **2016**, *14*, 1742-1747.
- S11 S. J. Hein, H. Arslan, I. Keresztes, W. R. Dichtel, *Org. Lett.* **2014**, *16*, 4416-4419.
- S12 X. Luo and P. Wang, *Org. Lett.* **2021**, *23*, 4960-4965.
- S13 H. Helbert, P. Visser, J. G. H. Hermens, J. Buter, B. L. Feringa, *Nat. Catal.* **2020**, *3*, 664-671.
- S14 J-T. Fan, X-H. Fan, C-Y. Gao, J. Weic, L-M. Yang, *Org. Chem. Front.* **2022**, *9*, 2357-2367.
- S15 Y. Gong, J. Liu, *Tetrahedron Lett.* **2016**, *57*, 2143-2146.
- S16 J. Spencer, R. P. Rathnam, H. Patel, N. Anjum, *Tetrahedron Lett.* **2008**, *64*, 10195-10200.
- S17 J. Li, J. Zhang, H. Tan, D. Z. Wang, *Org. Lett.* **2015**, *17*, 2522-2525.
- S18 K. Sugimoto, R. Hayashi, H. Nemoto, N. Toyooka, Y. Matsuya, *Org. Lett.* **2012**, *13*, 3510-3513.
- S19 V. Weingand, T. Wurm, V. Vethacke, M. C. Dietl, D. Ehjeij, M. Rudolph, F. Rominger, J. Xie, A. S. K. Hashmi, *Chem. Eur. J.* **2018**, *24*, 3725-3728.
- S20 K. Kubota, E. Yamamoto, H. Ito, *Adv. Synth. Catal.* **2013**, *355*, 3527-3531.
- S21 Y. Yang, X. Lin, Z. Zheng, G. Lin, Y. Zhang, Y. You, Z. Weng, *J. Fluor. Chem.* **2017**, *204*, 1-5.
- S22 T. Dong, J. He, Z-H. Li, C-P. Zhang, *ACS Sustainable Chem. Eng.* **2018**, *6*, 1327-1335.
- S23 C. Ghiazza, A. Tlili, T. Billard, *Eur. J. Org. Chem.* **2018**, *27*, 3680-3683.
- S24 C. Ghiazza, V Debrauwer, T. Billard, A. Tlili, *Chem. Eur. J.* **2018**, *24*, 97-100.
- S25 Y. Wang, Y. You, Z. Weng, *Org. Chem. Front.* **2015**, *2*, 574-577.
- S26 C. Ghiazza, T. Billard, A. Tlili, *Chem. Eur. J.* **2017**, *23*, 10013-10016.
- S27 Z. Xu, J. Yao, K. Zhong, S. Lin, X. Hu, Z. Ruan, *J. Org. Chem.* **2023**, *88*, 5572-5585.

## 9. $^1\text{H}$ , $^{13}\text{C}$ , and $^{19}\text{F}$ NMR Spectra of New Compounds

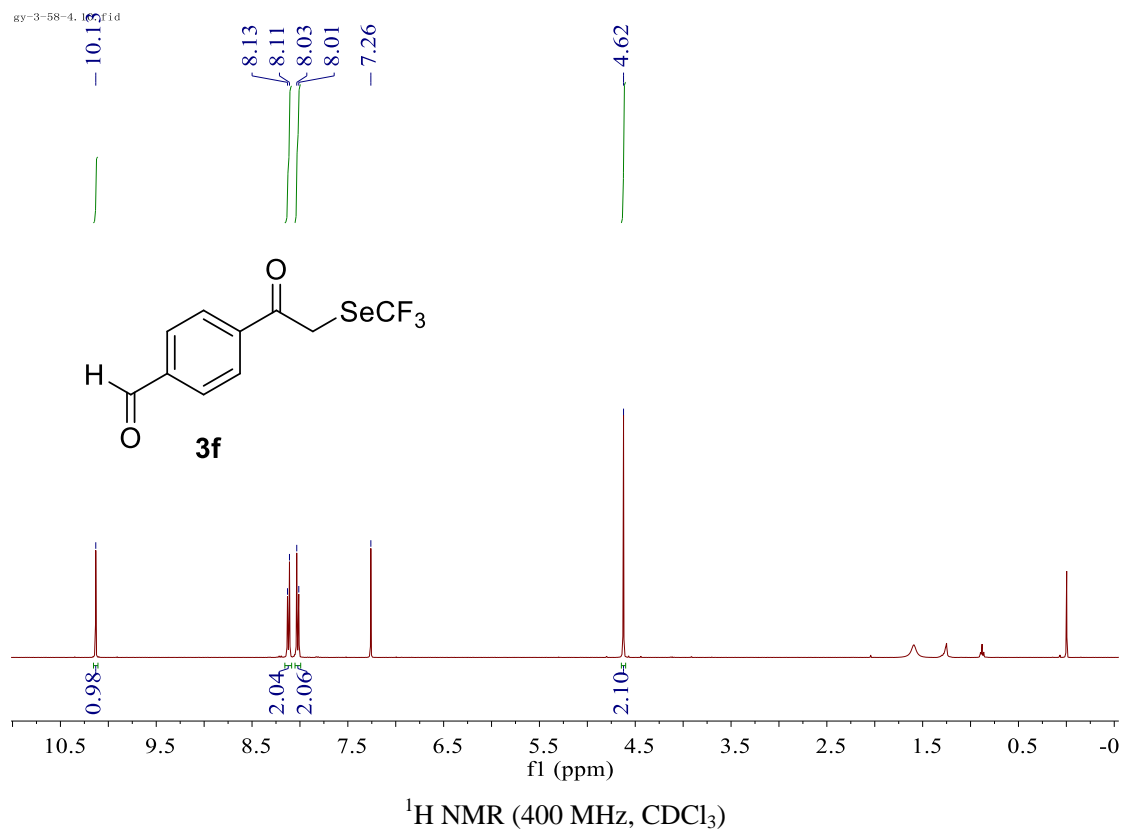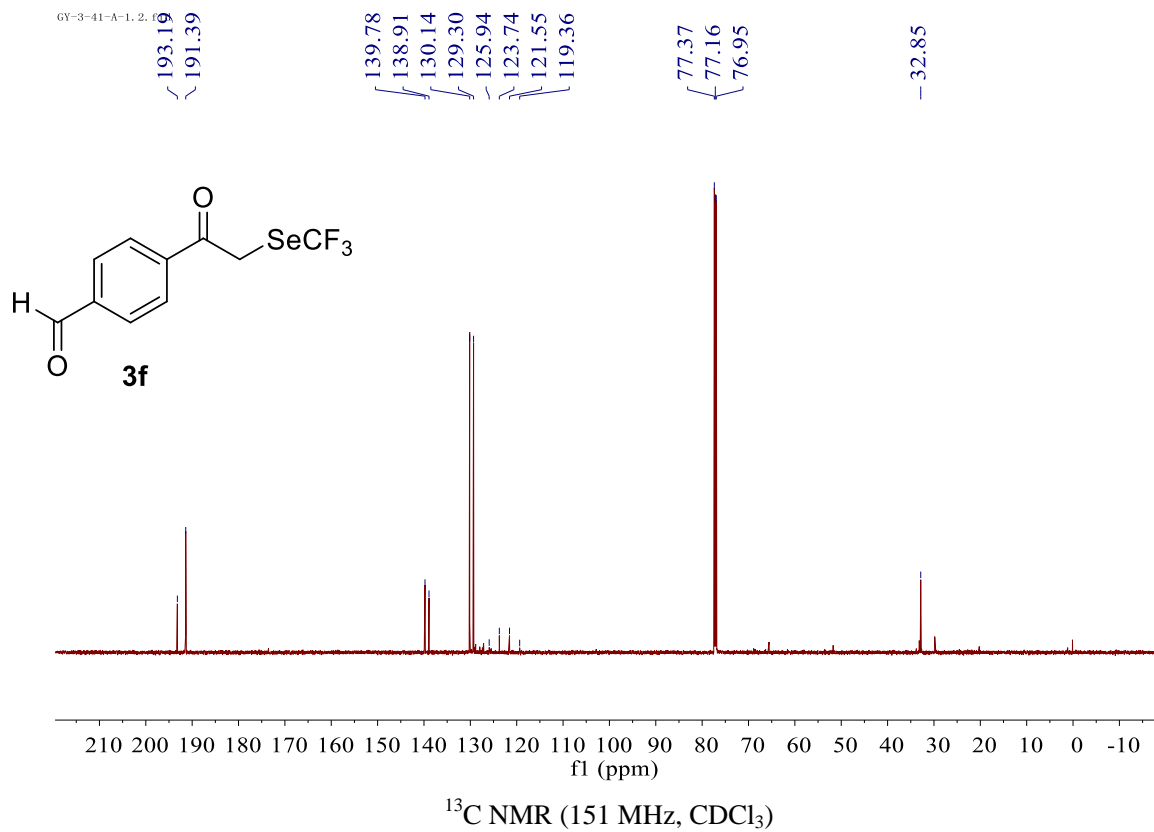

gy-3-41-1.11.fid  
1H NMR (400 MHz, CDCl3)

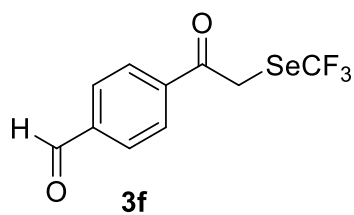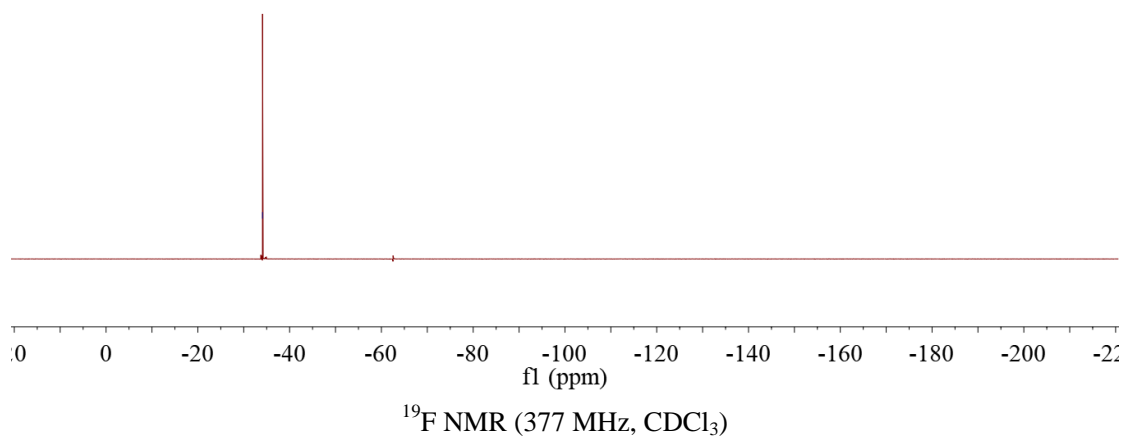

gy-3-45-2.10.fid

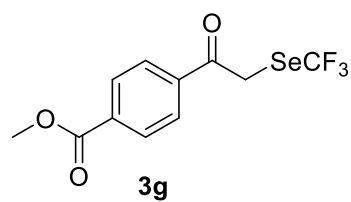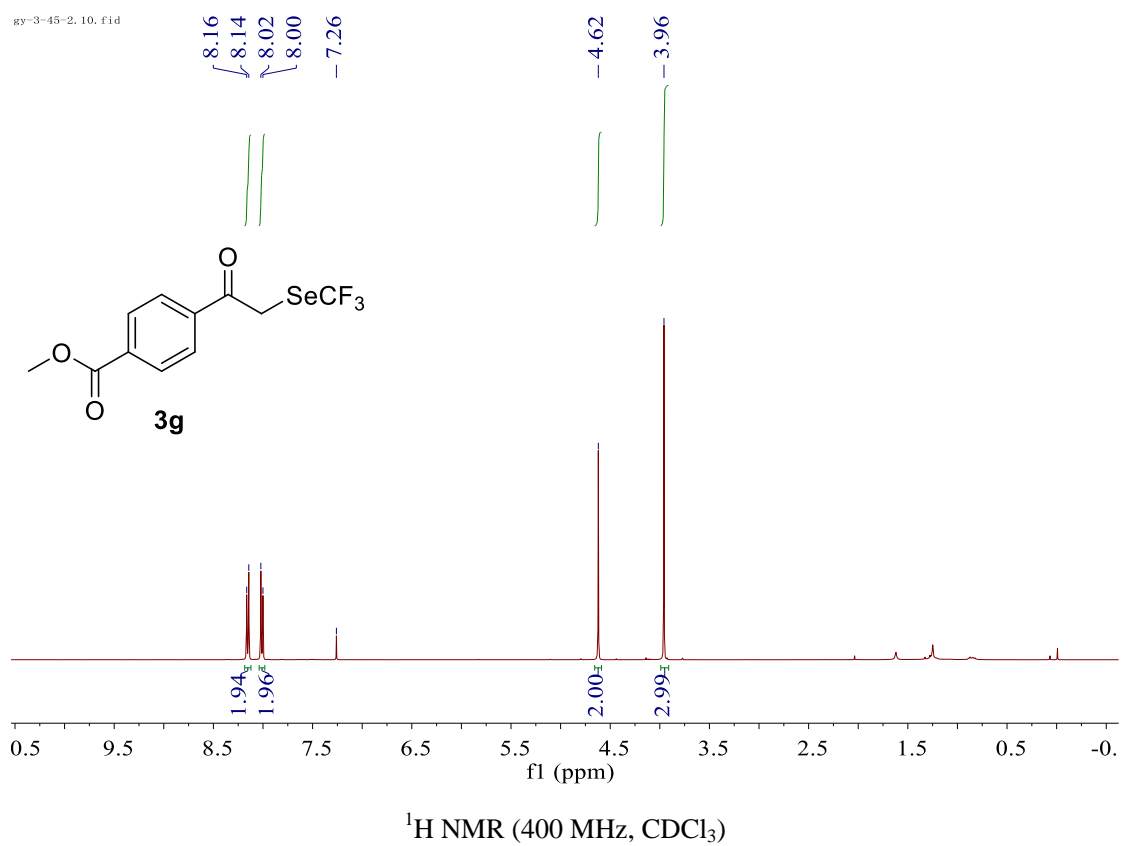



gy-3-45-2-c.10.f1d

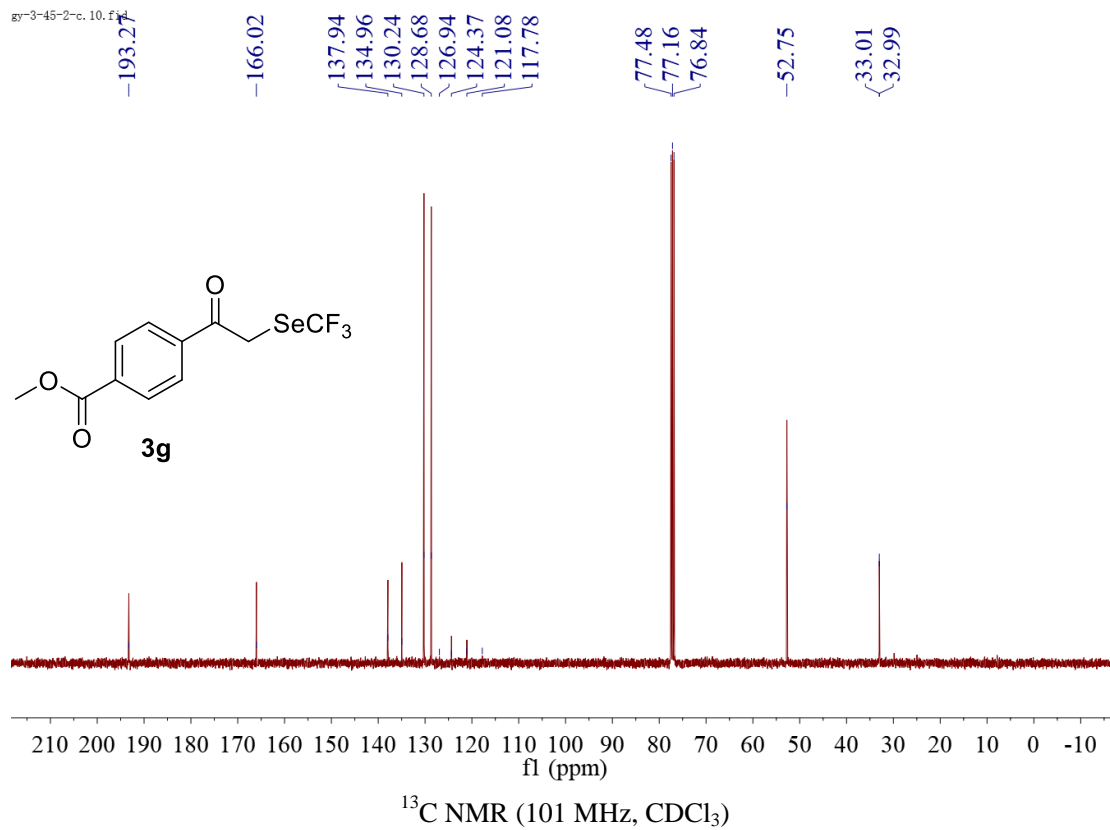

gy-3-45-2.11.f1d

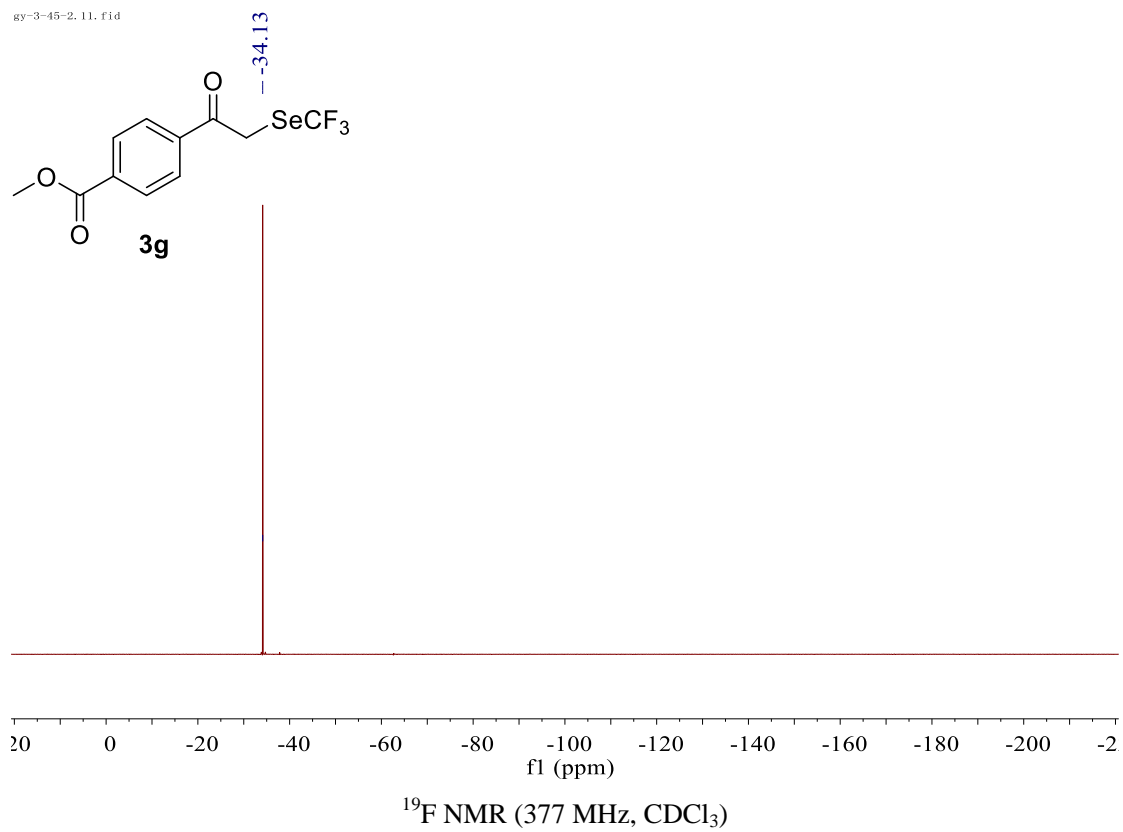

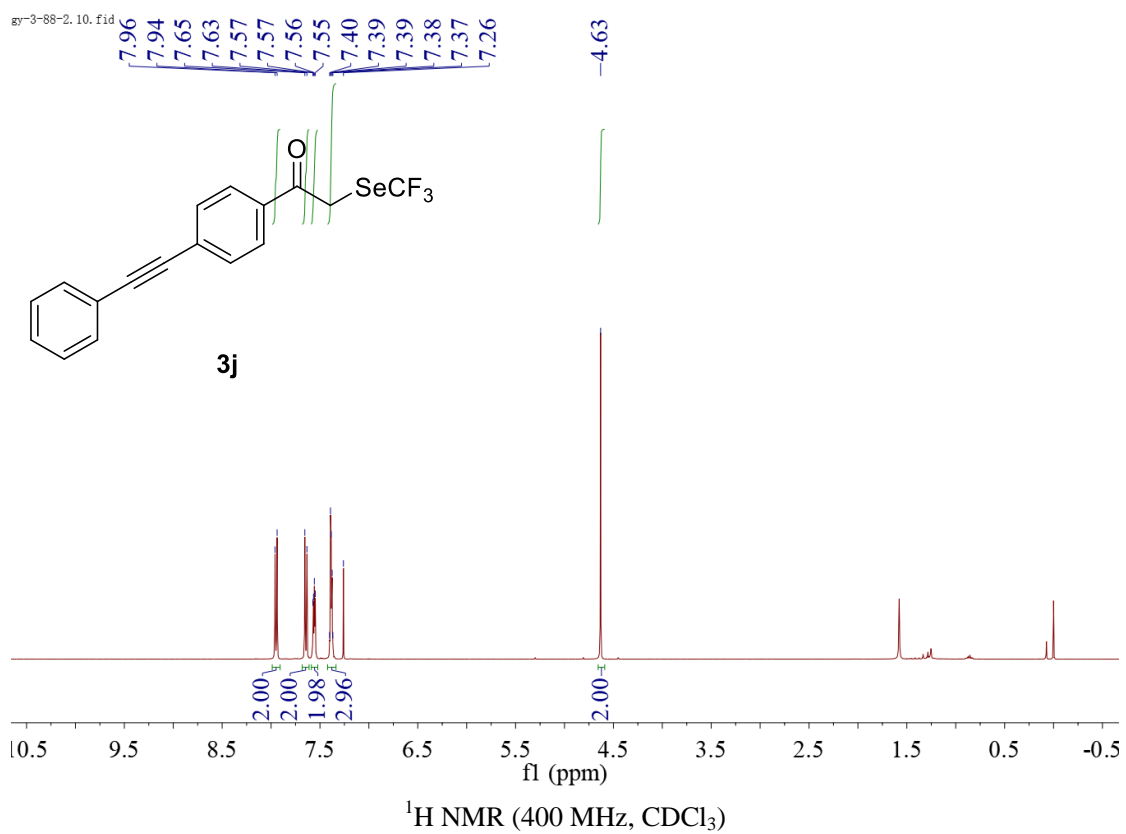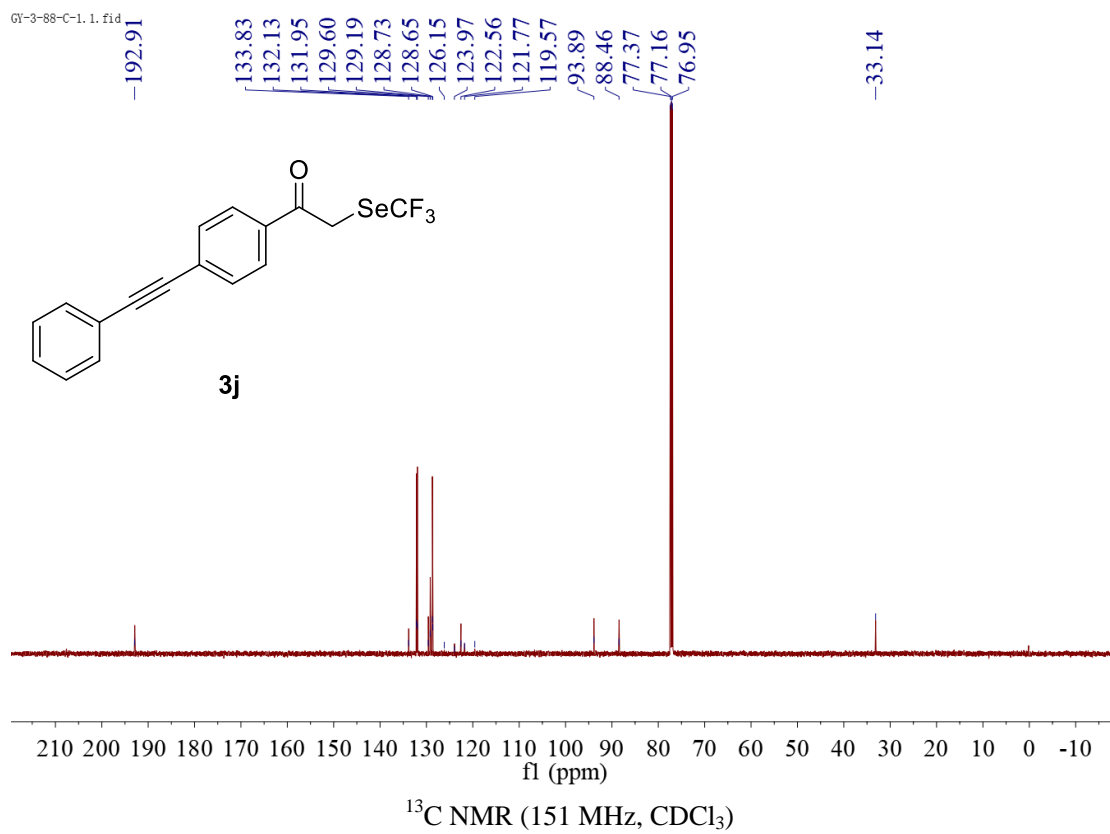

gy-3-88-2.11.fid

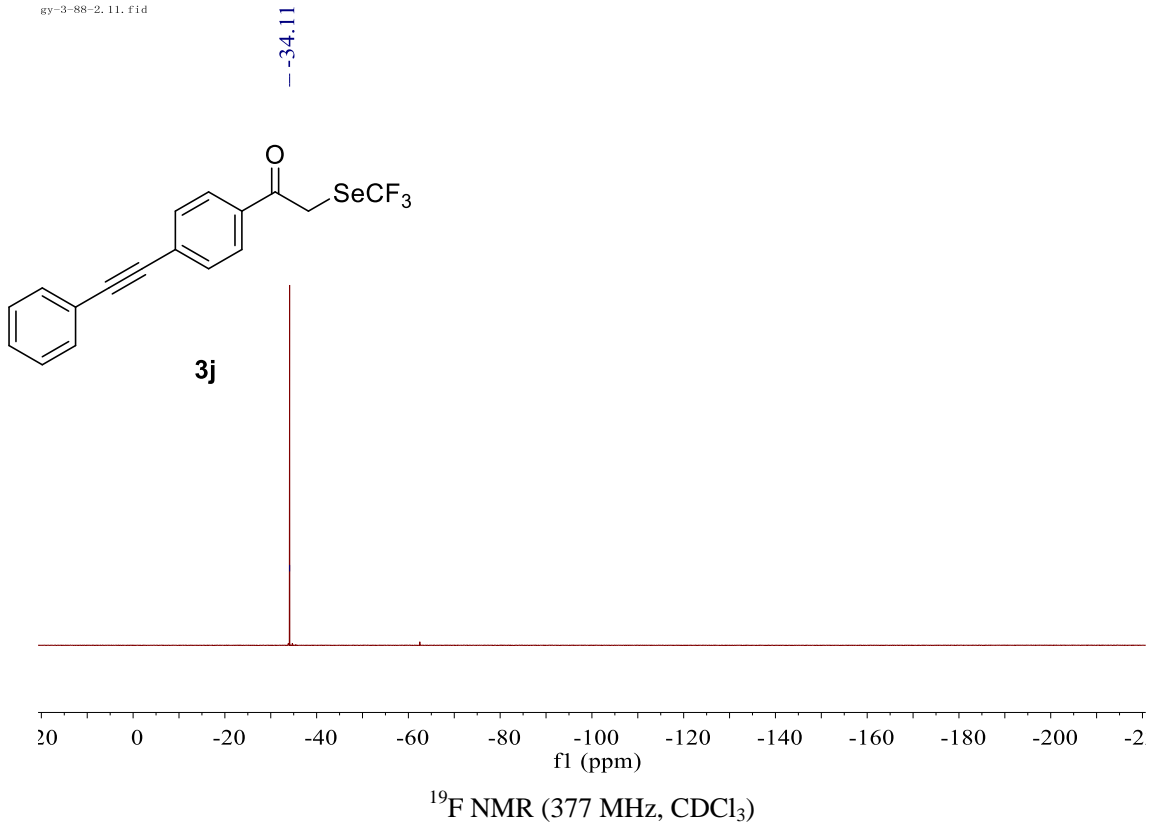

gy-3-35-16.10.fid

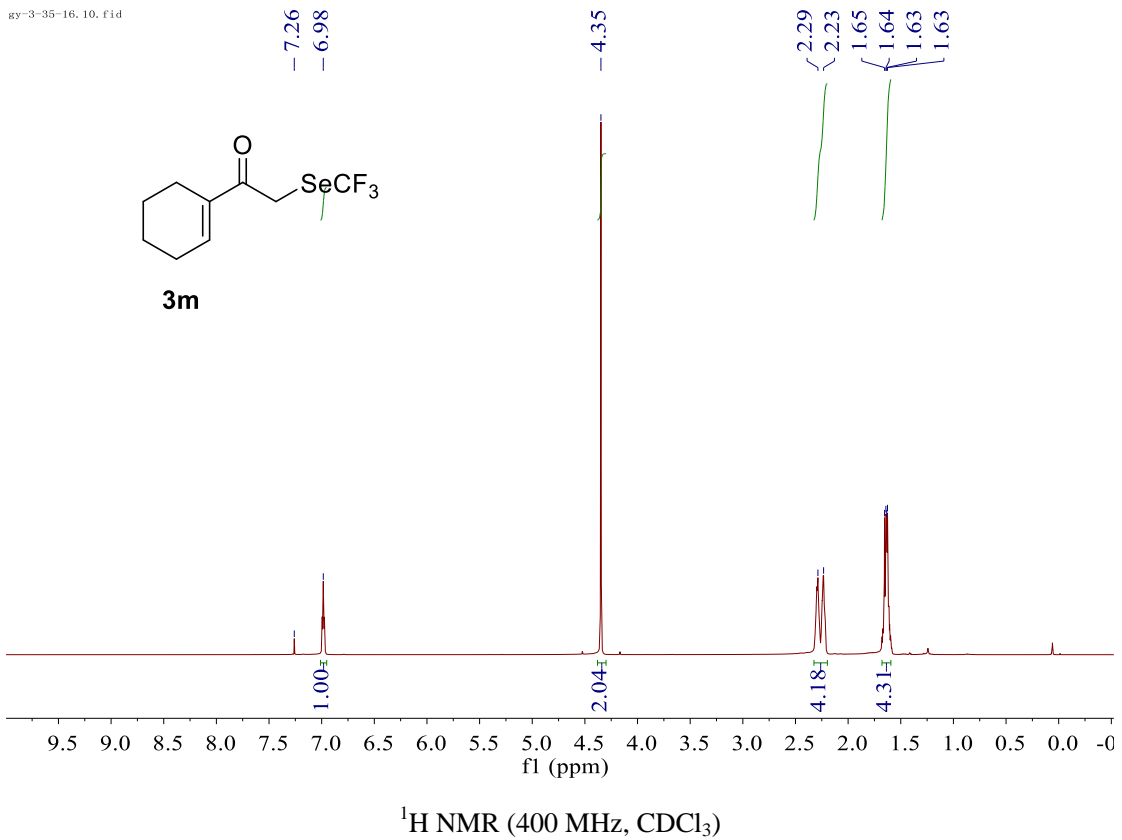

ZSB-3-46-C. 1. f1d6

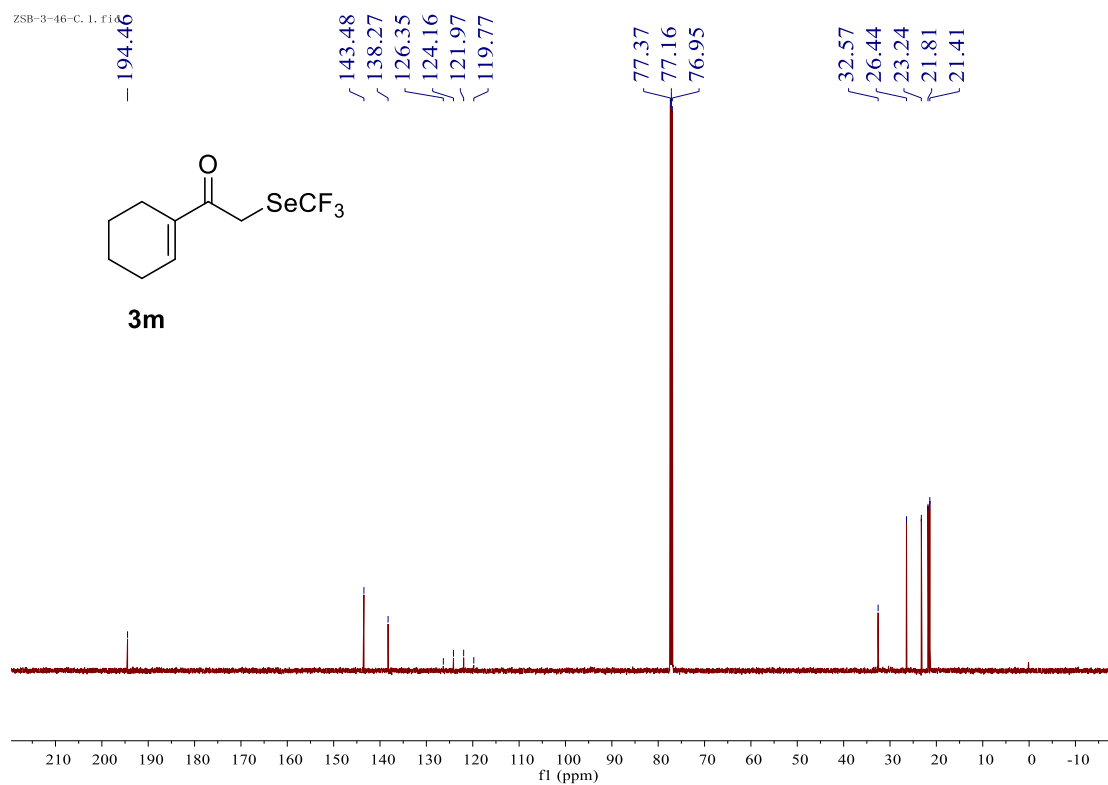

$^{13}\text{C}$  NMR (151 MHz,  $\text{CDCl}_3$ )

zsb-3-46-1. 11. f1d

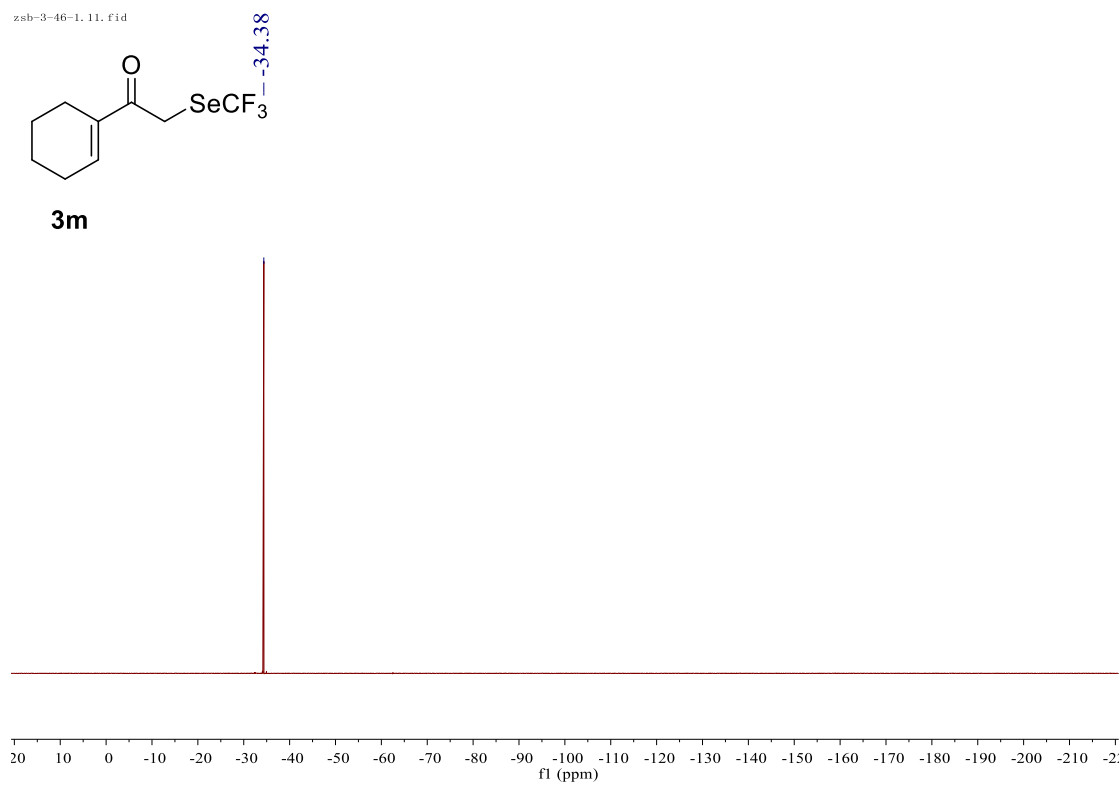

$^{19}\text{F}$  NMR (377 MHz,  $\text{CDCl}_3$ )

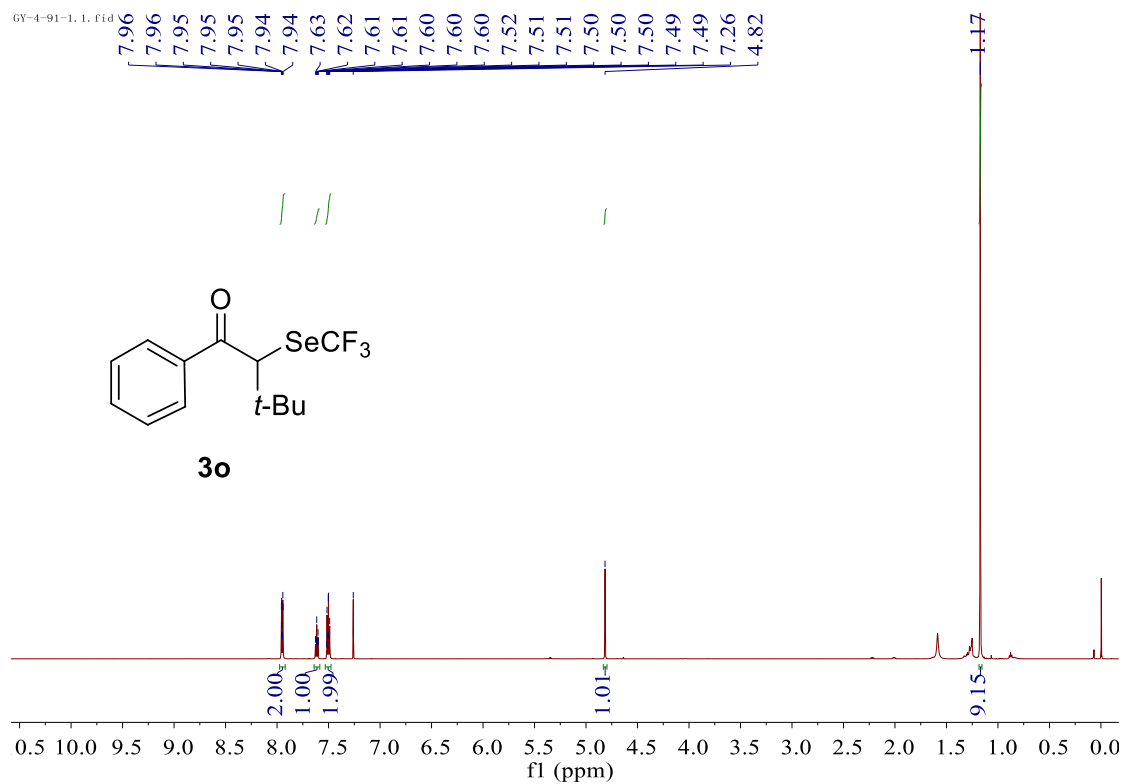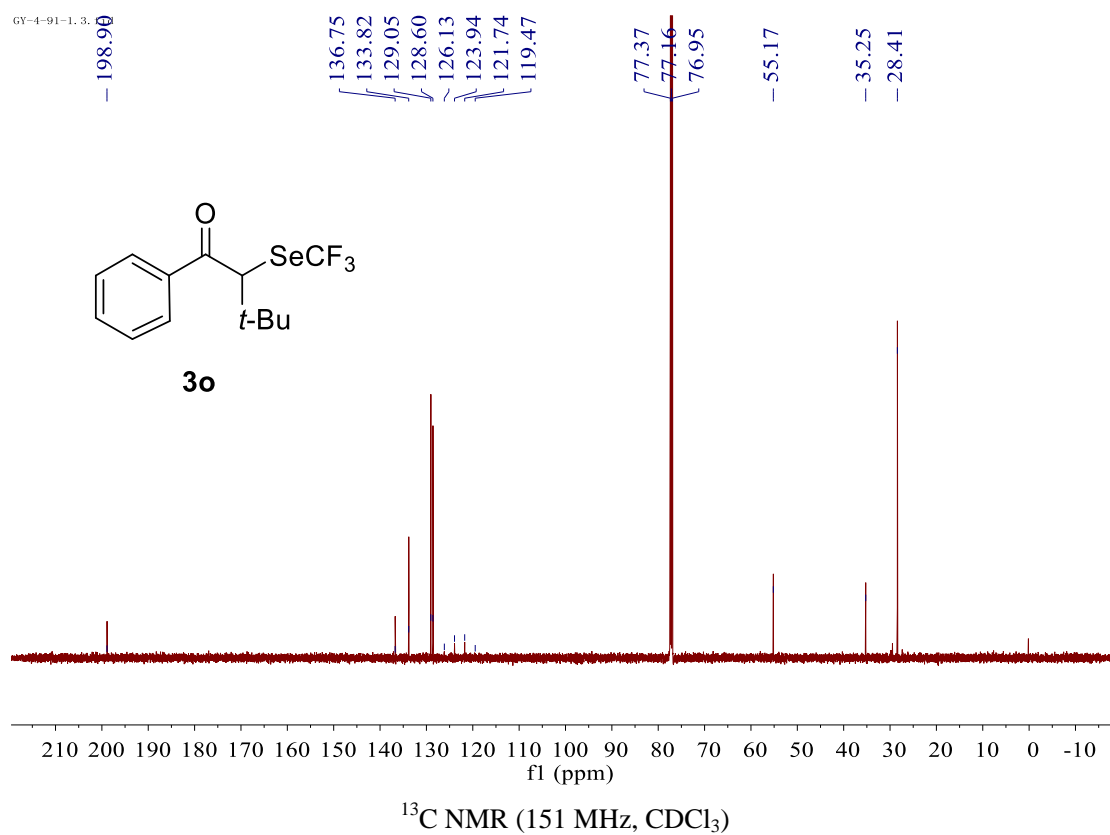

-33.39

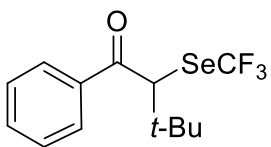

**3o**

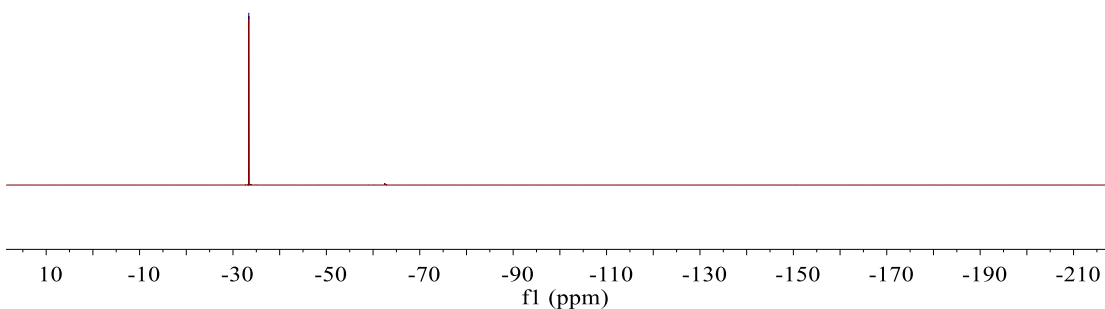

<sup>19</sup>F NMR (565 MHz, CDCl<sub>3</sub>)

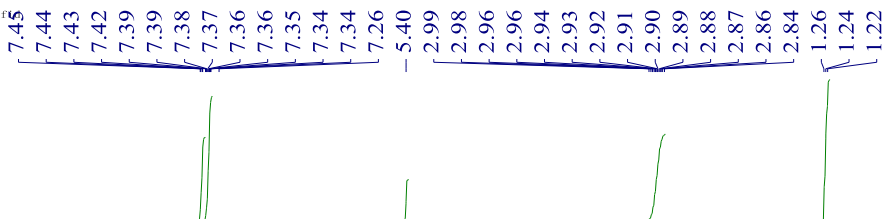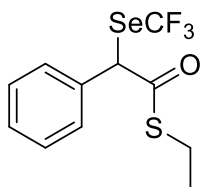

**3q**

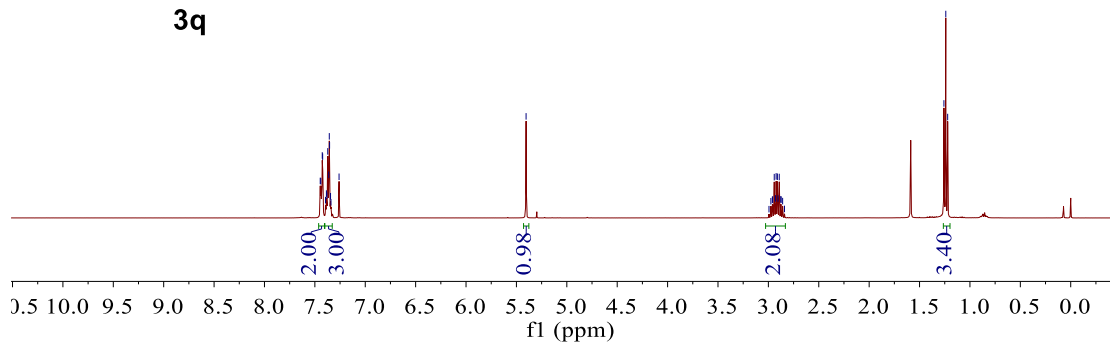

<sup>1</sup>H NMR (400 MHz, CDCl<sub>3</sub>)

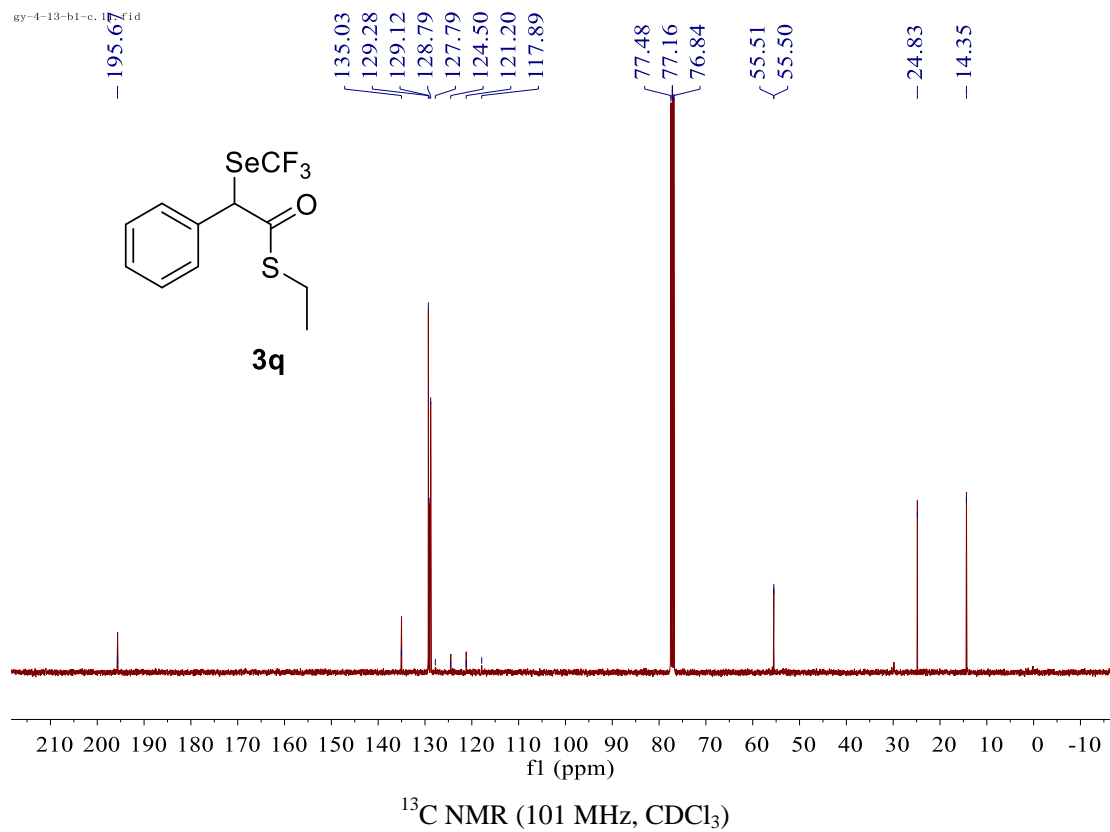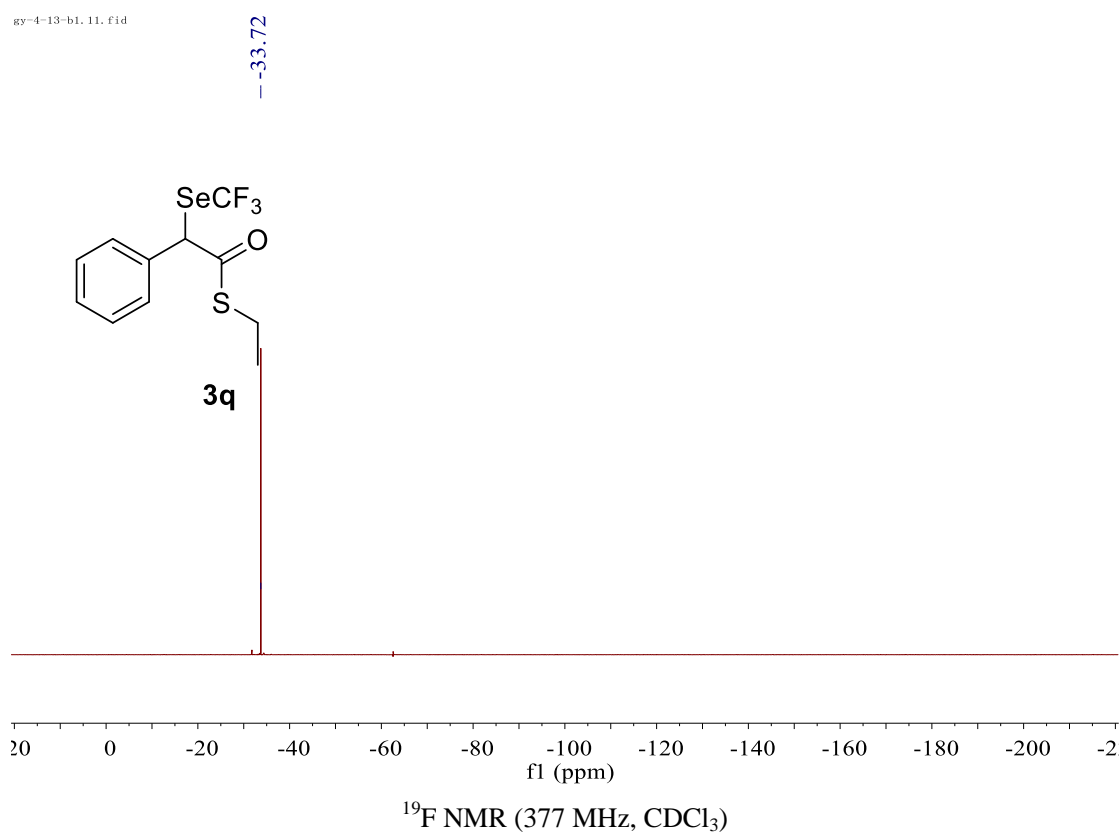

gy-4-18-3, 1.fid

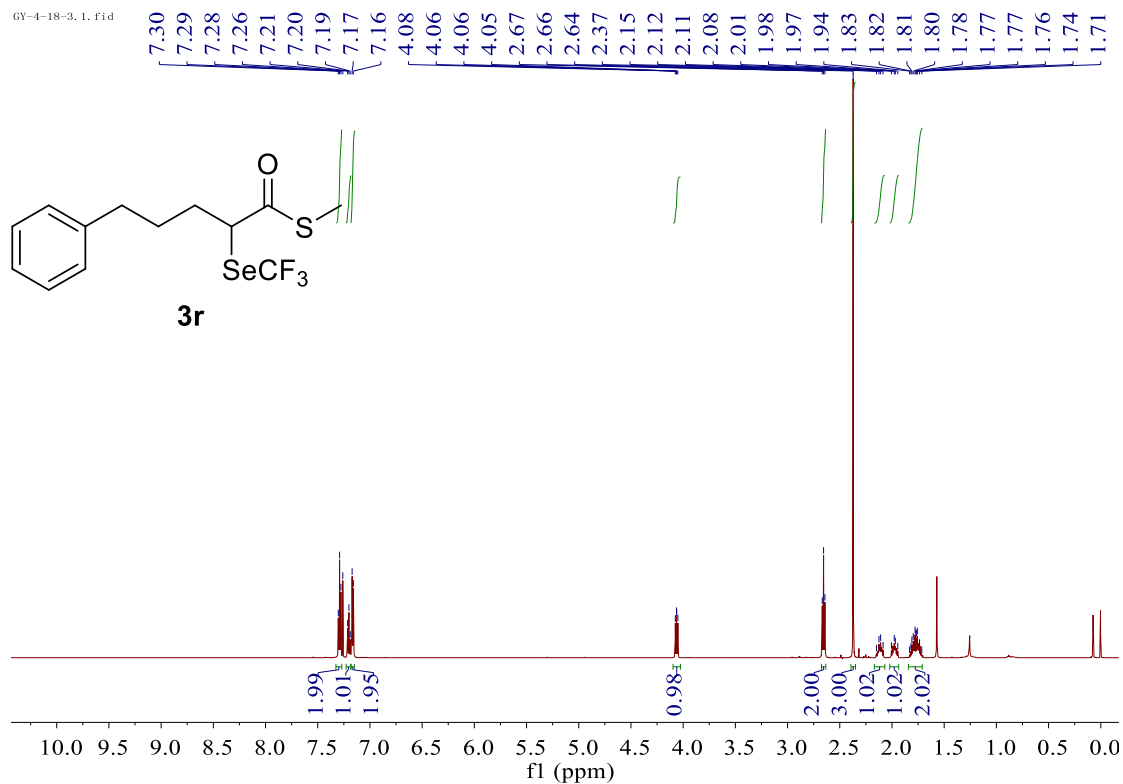

gy-4-18-c-1.fid

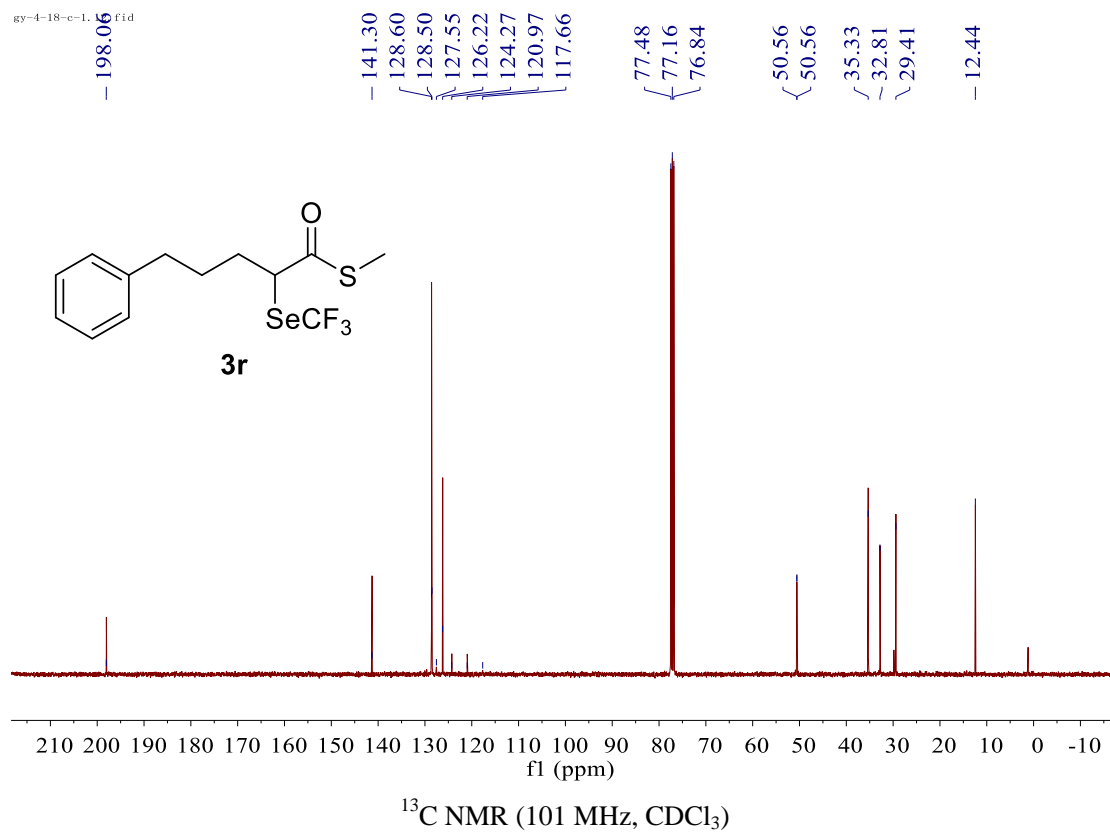



gy-4-18-c-1.11.fid

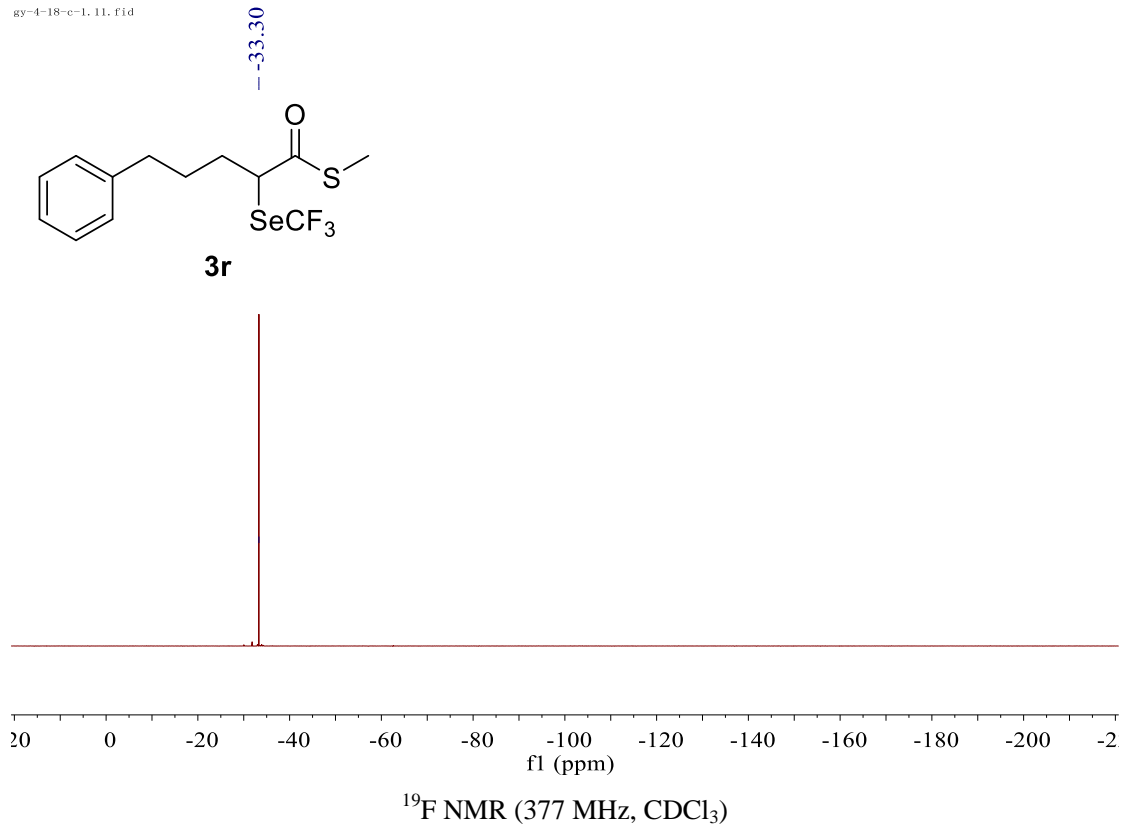

gy-3-99-a.20.fid

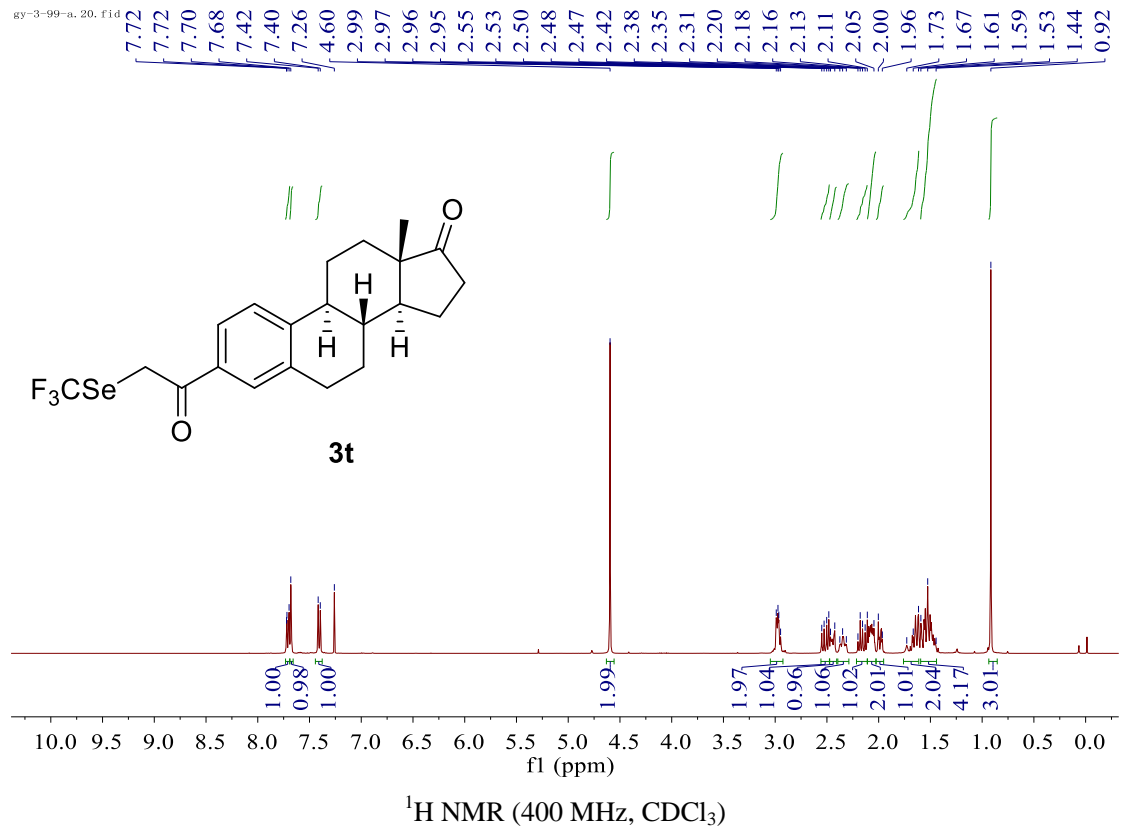

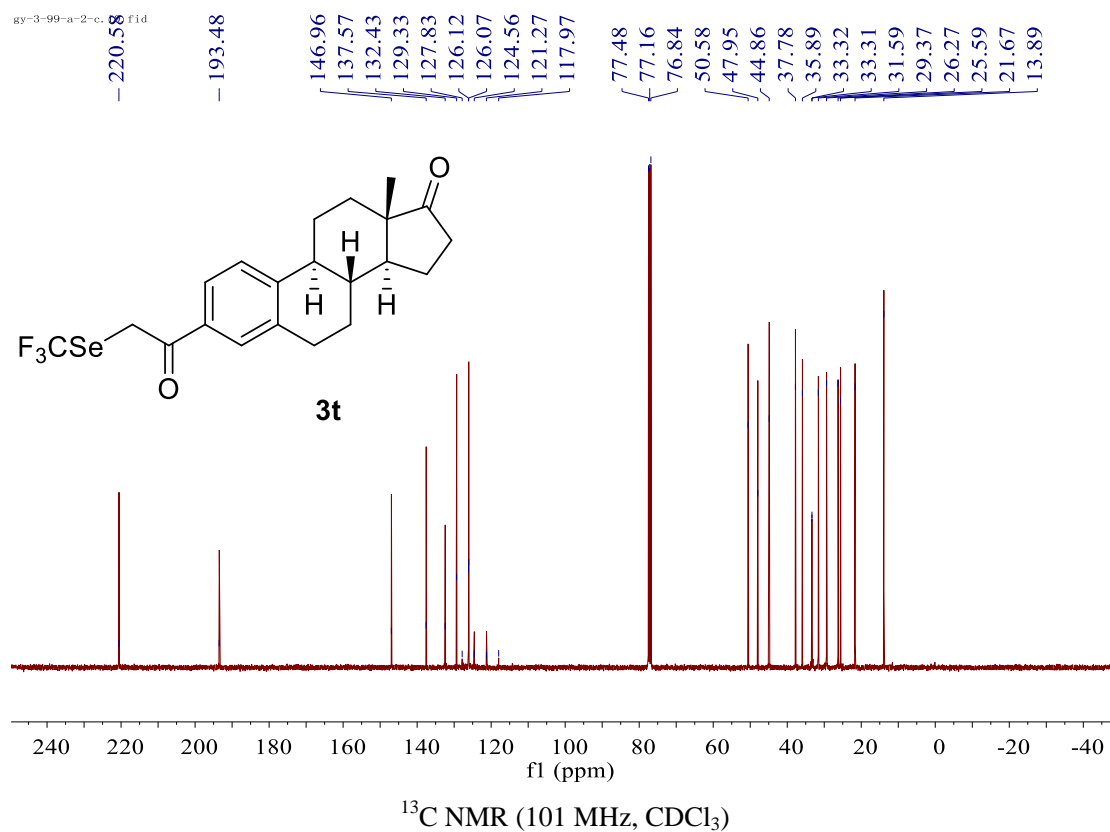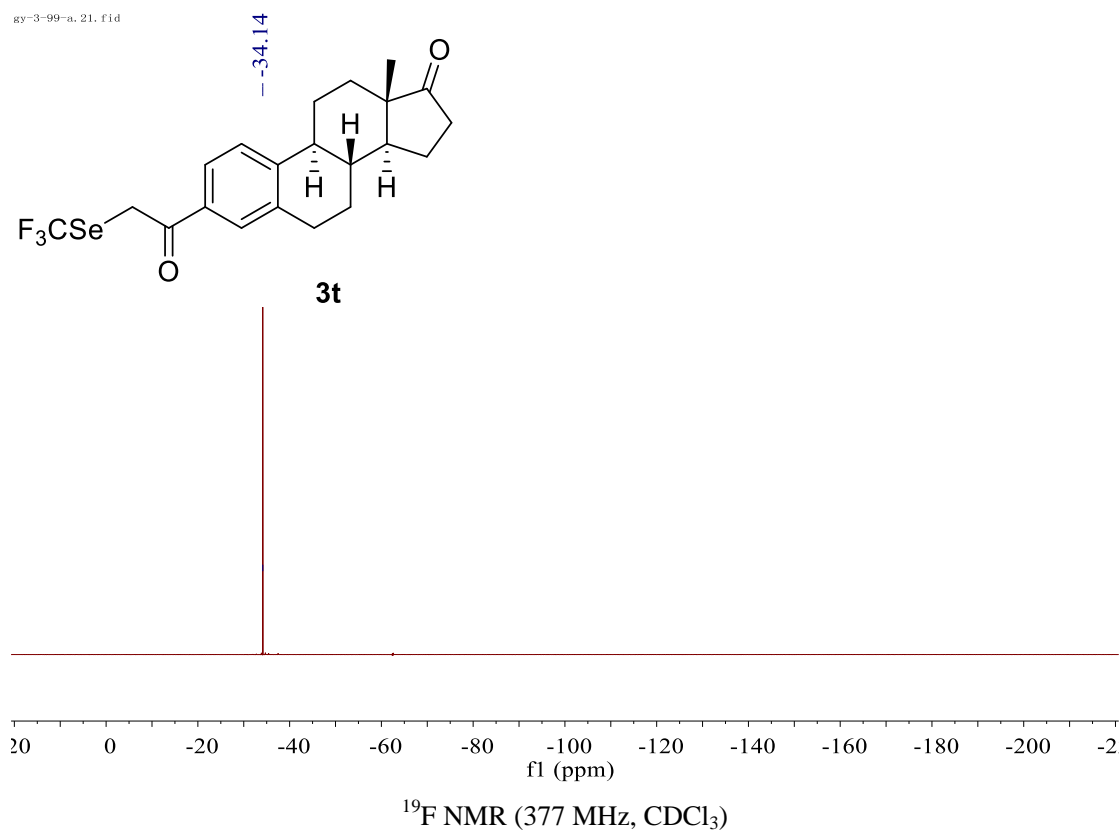

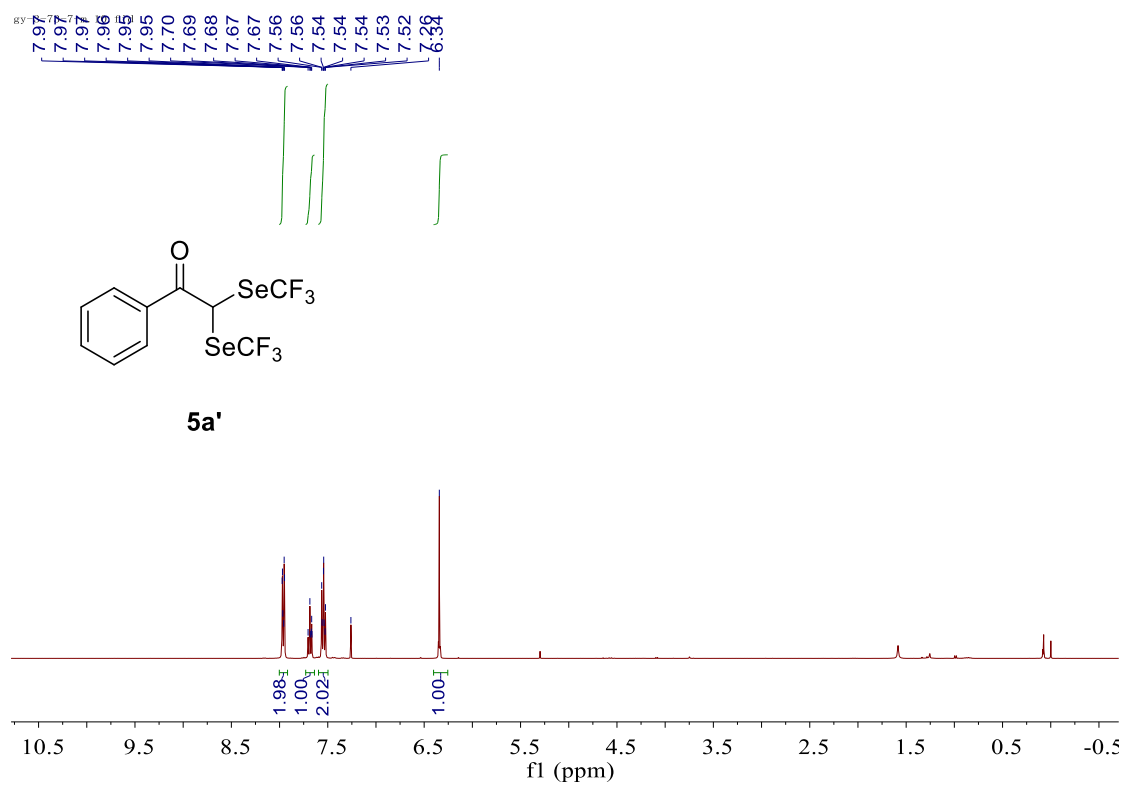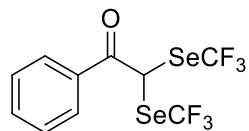

5a'

<sup>1</sup>H NMR (400 MHz, CDCl<sub>3</sub>)

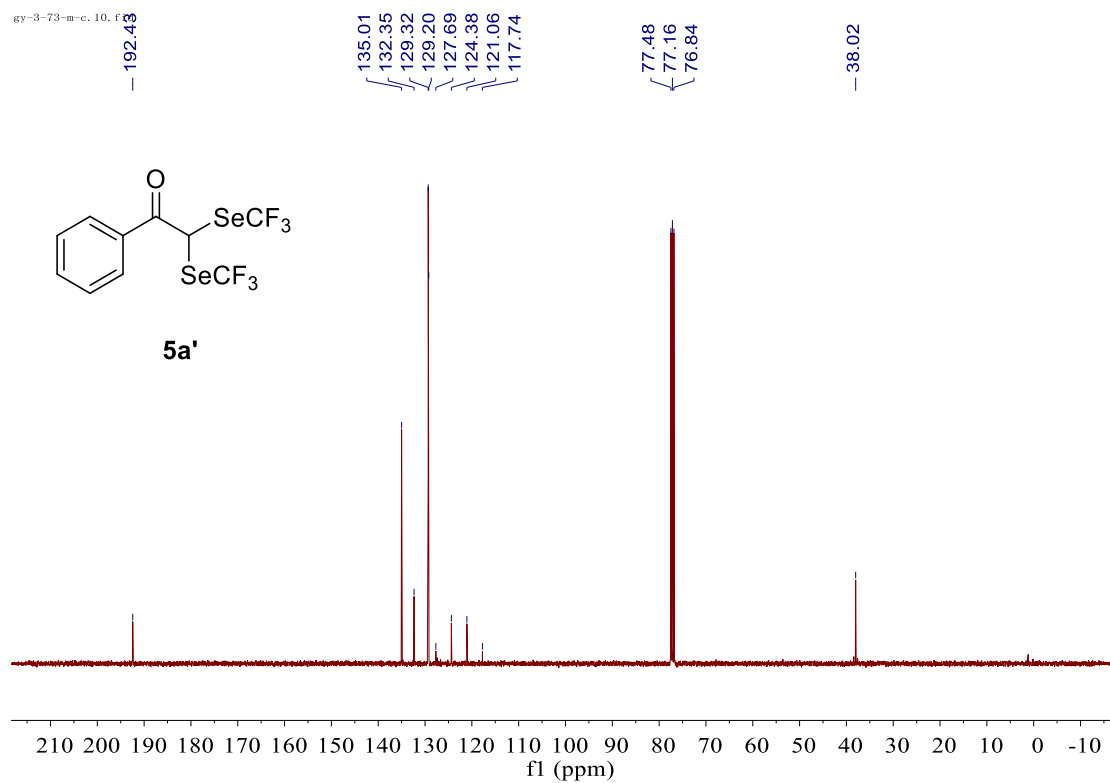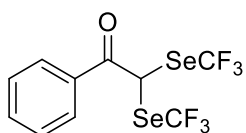

5a'

<sup>13</sup>C NMR (101 MHz, CDCl<sub>3</sub>)

gy-3-73-7-m. 11. fid

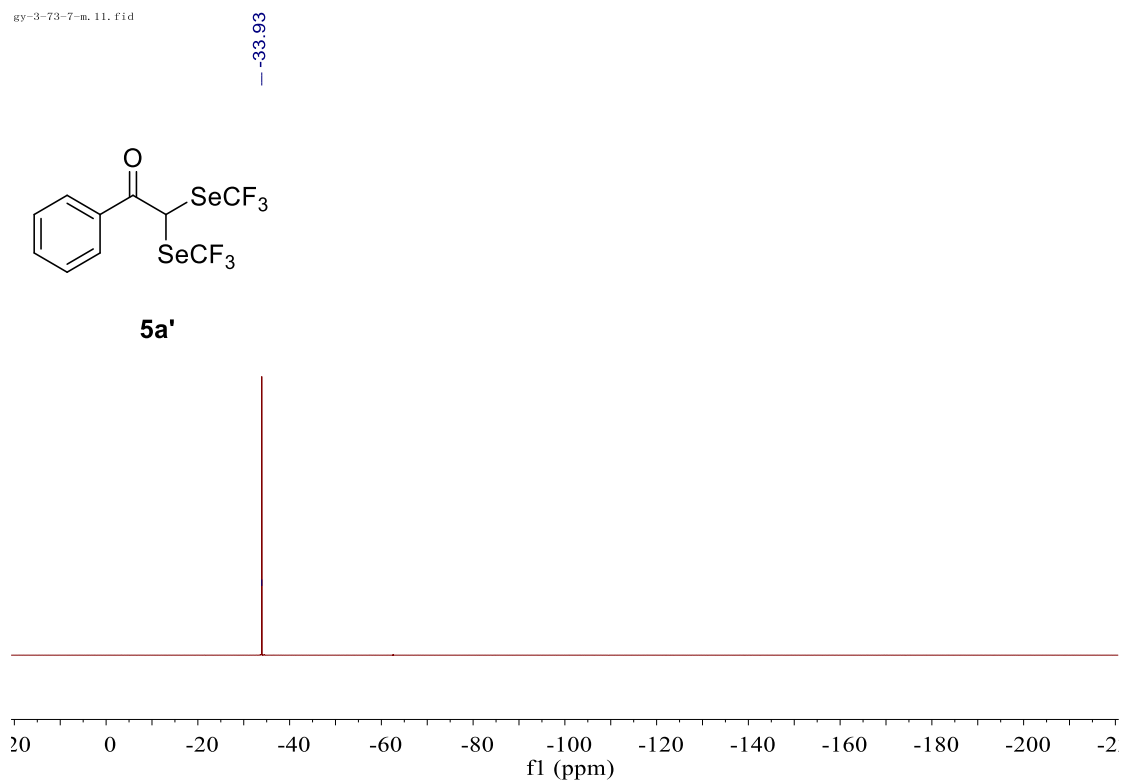

gy-3-26-1. 10. fid

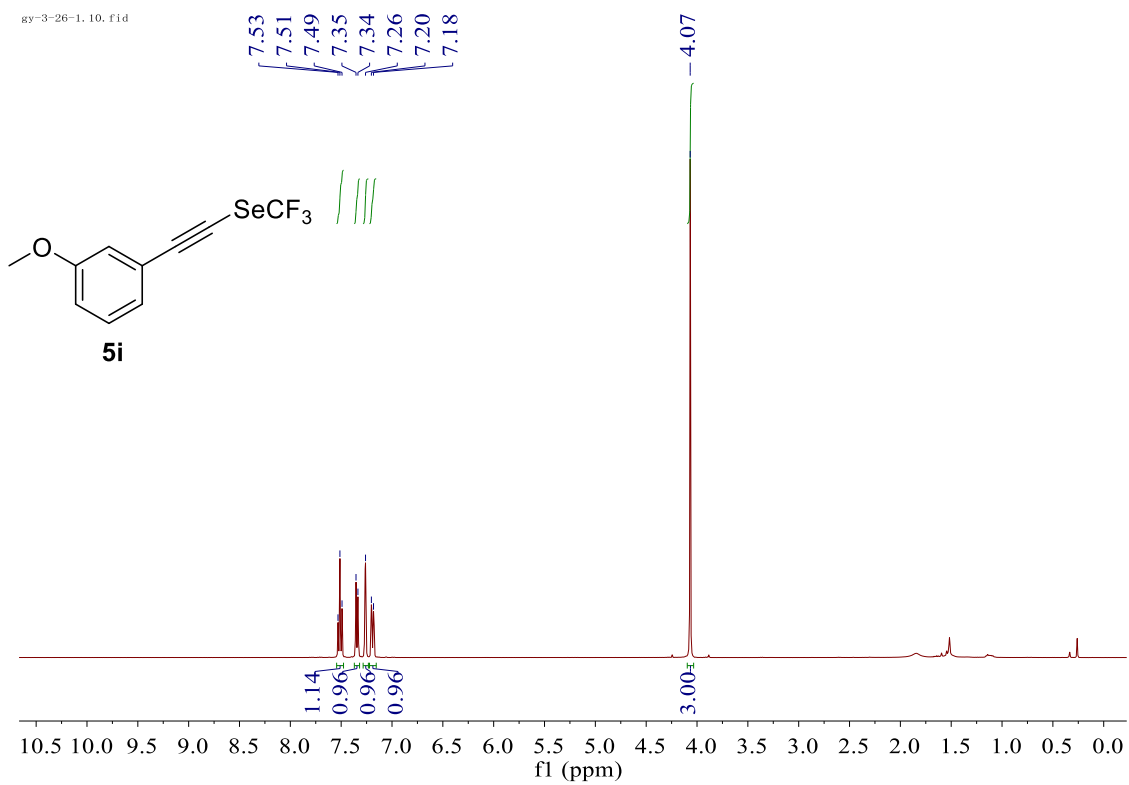

GV-3-26-1-C, 1, f1d

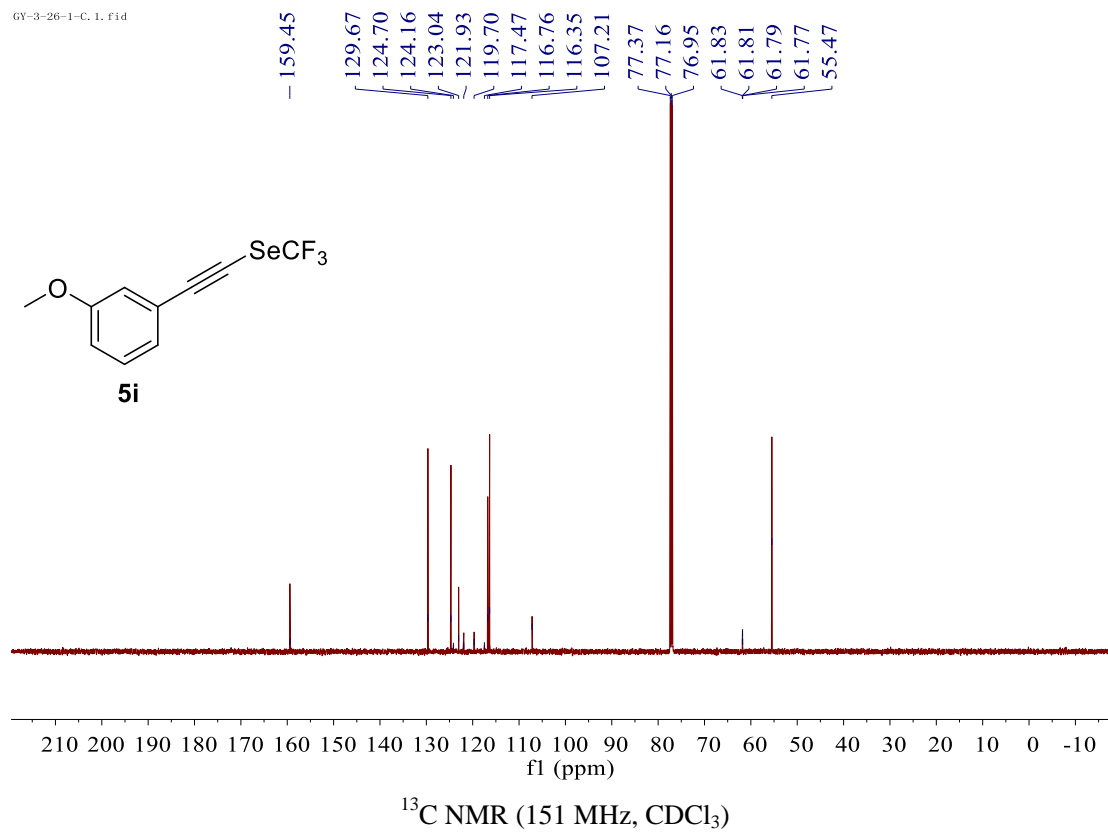

gy-3-26-1, 11, f1d

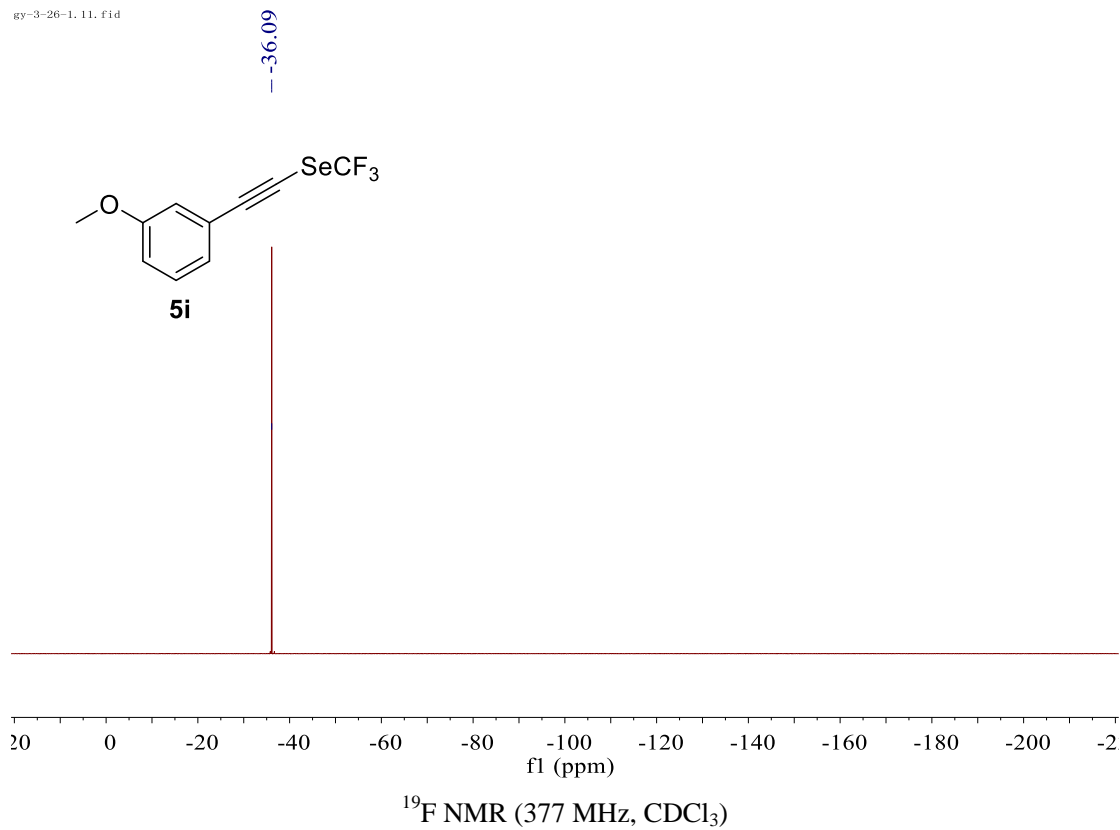

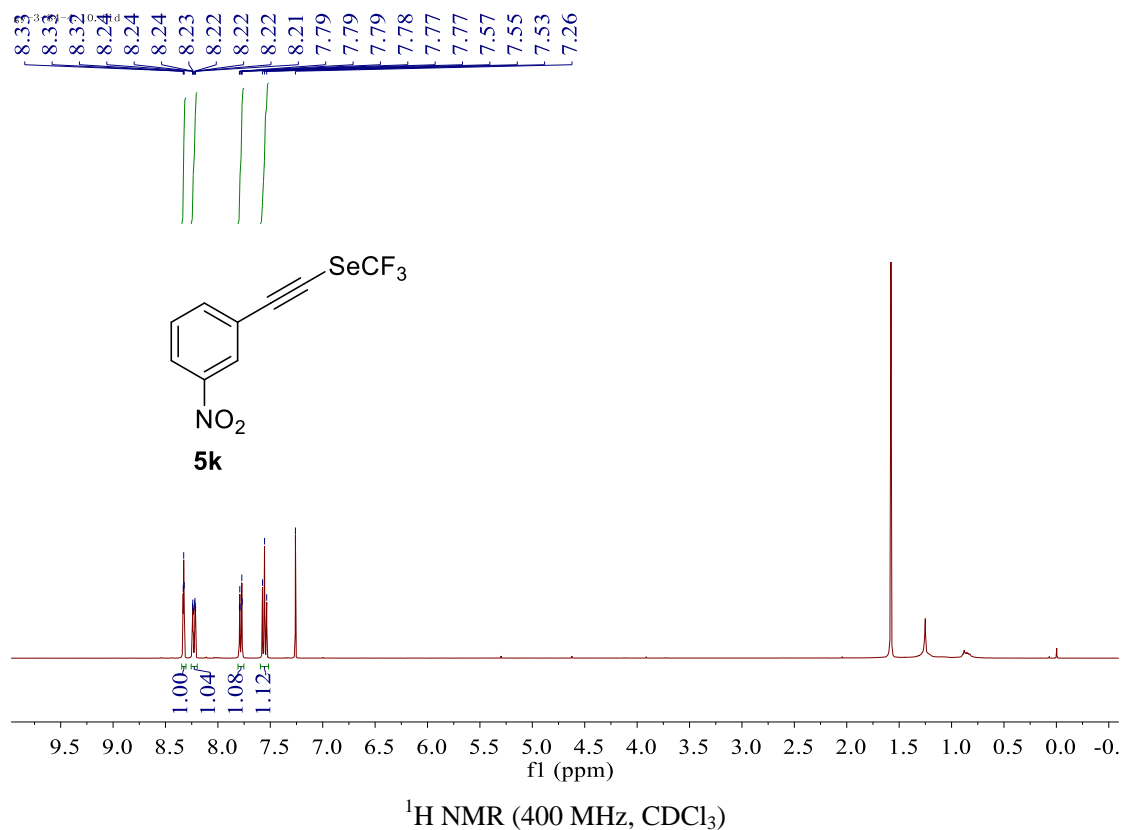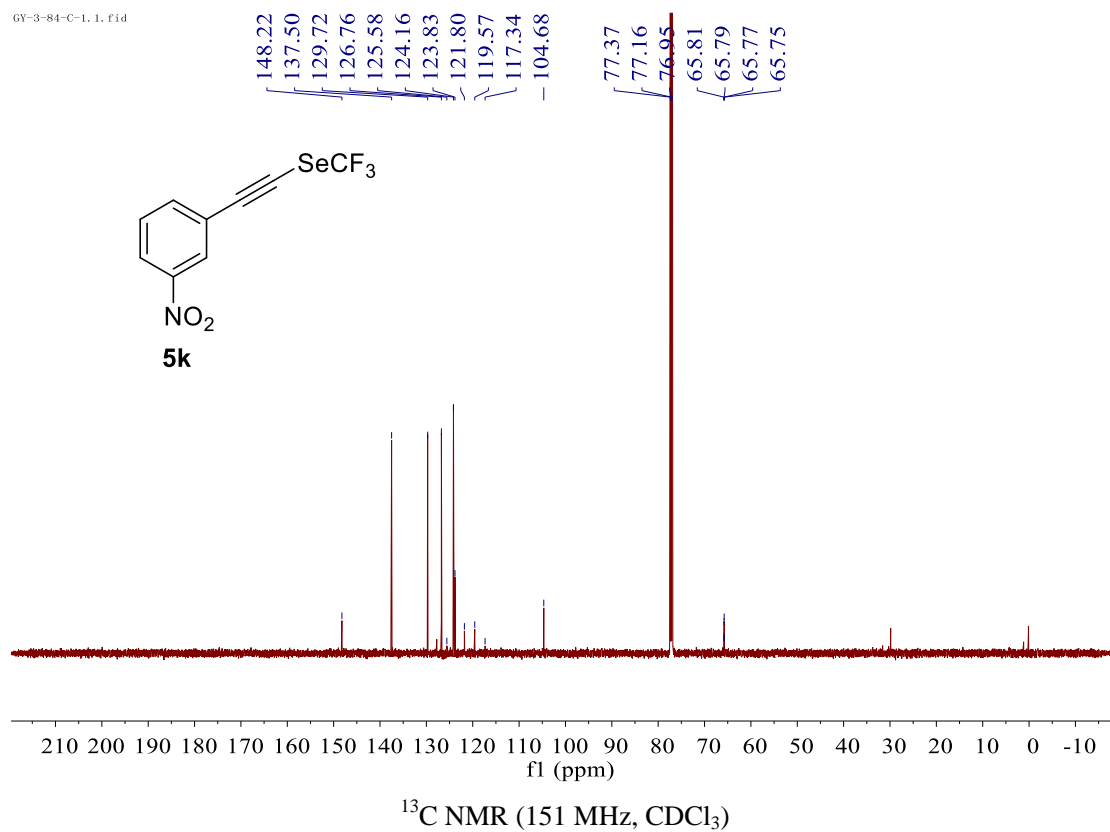

gy-3-84-2, 11, fid

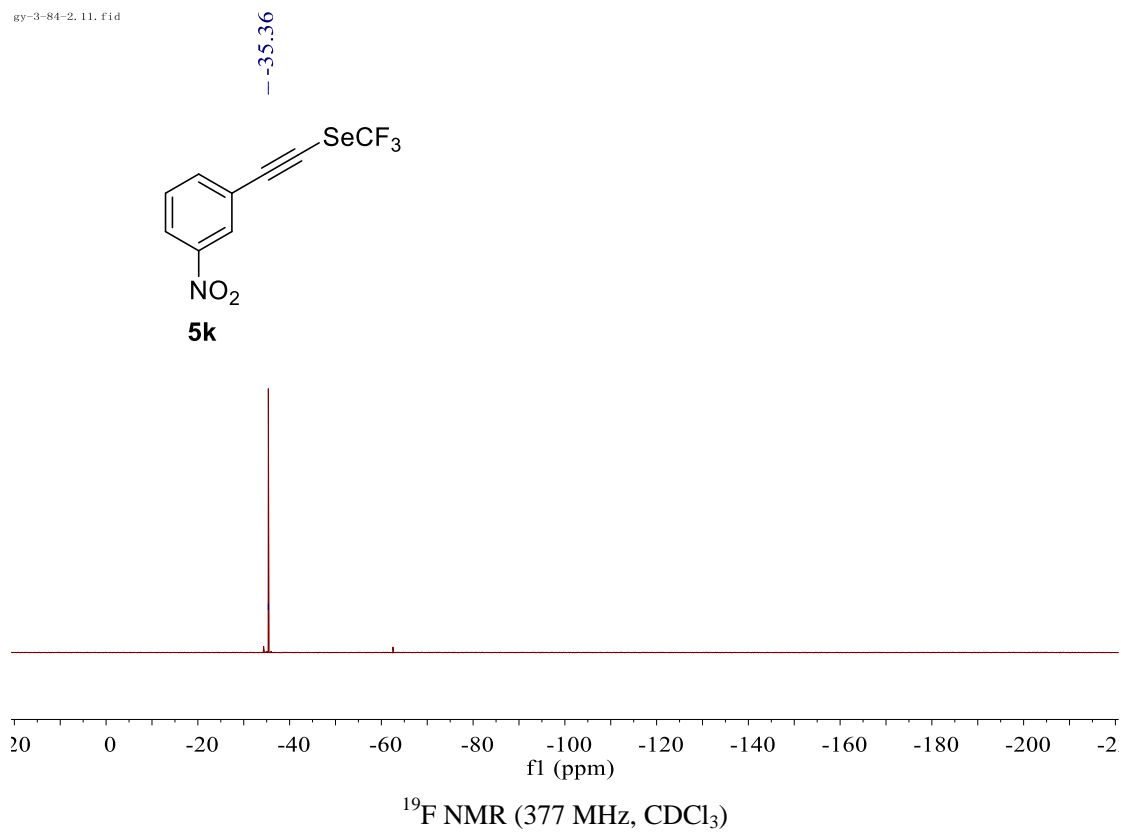

gy-3-95-1, 10, fid

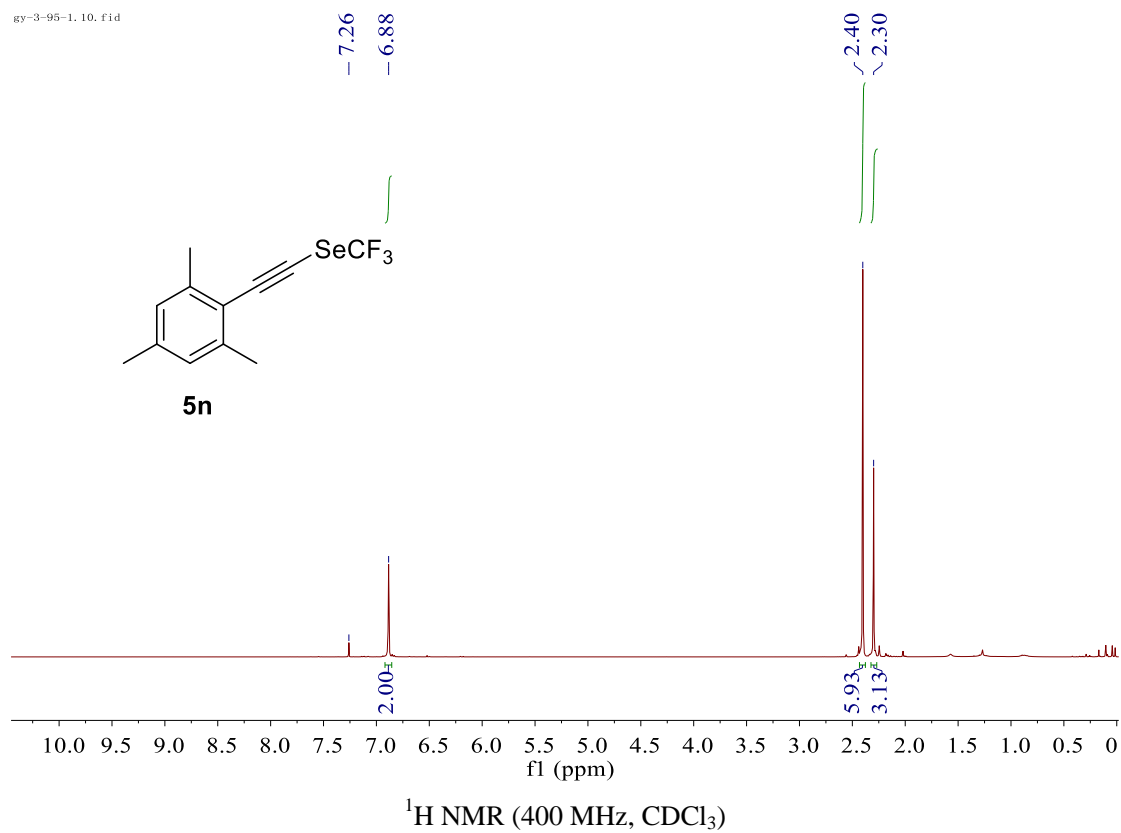

gy-3-95-c. 10. fid

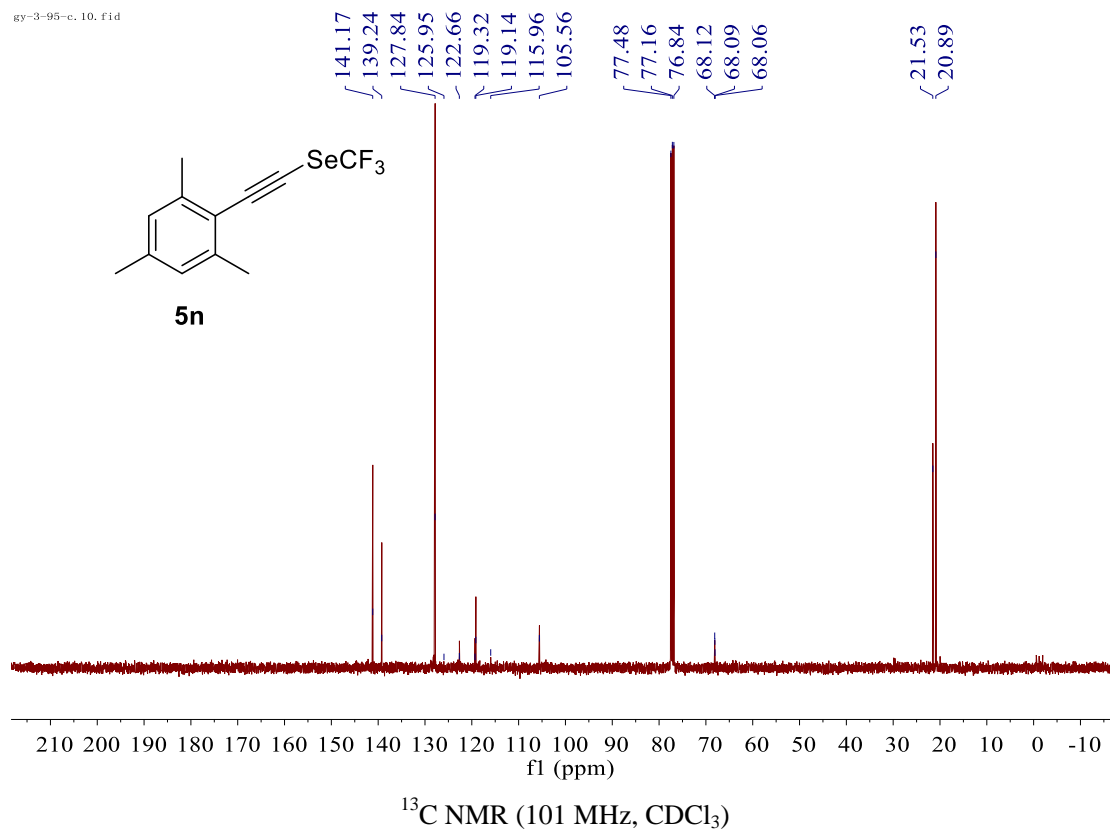

gy-3-95-1. 11. fid

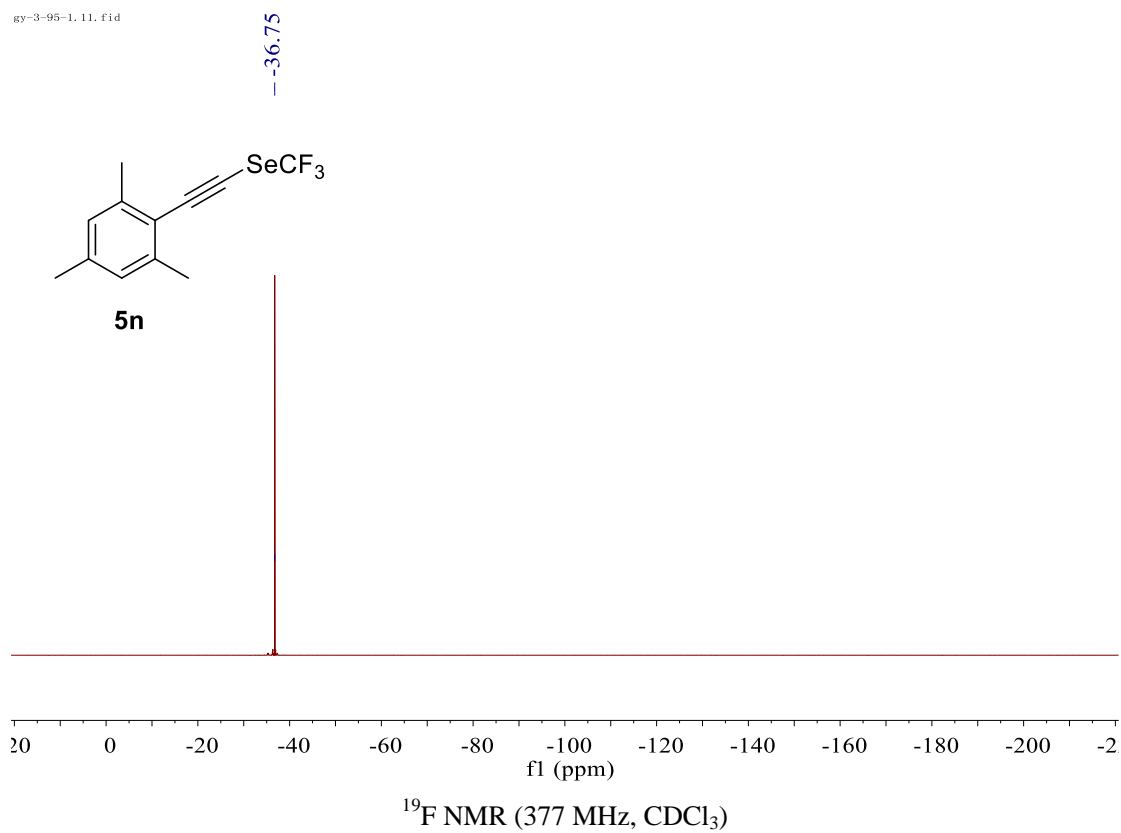



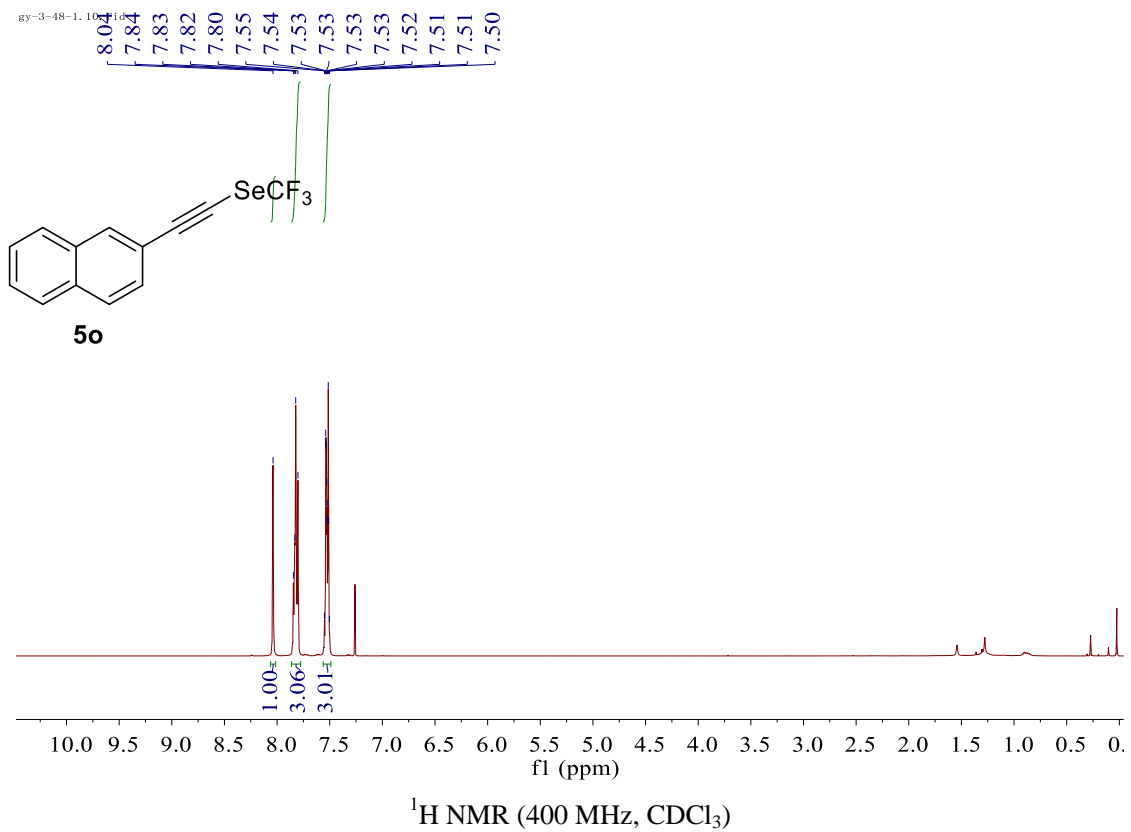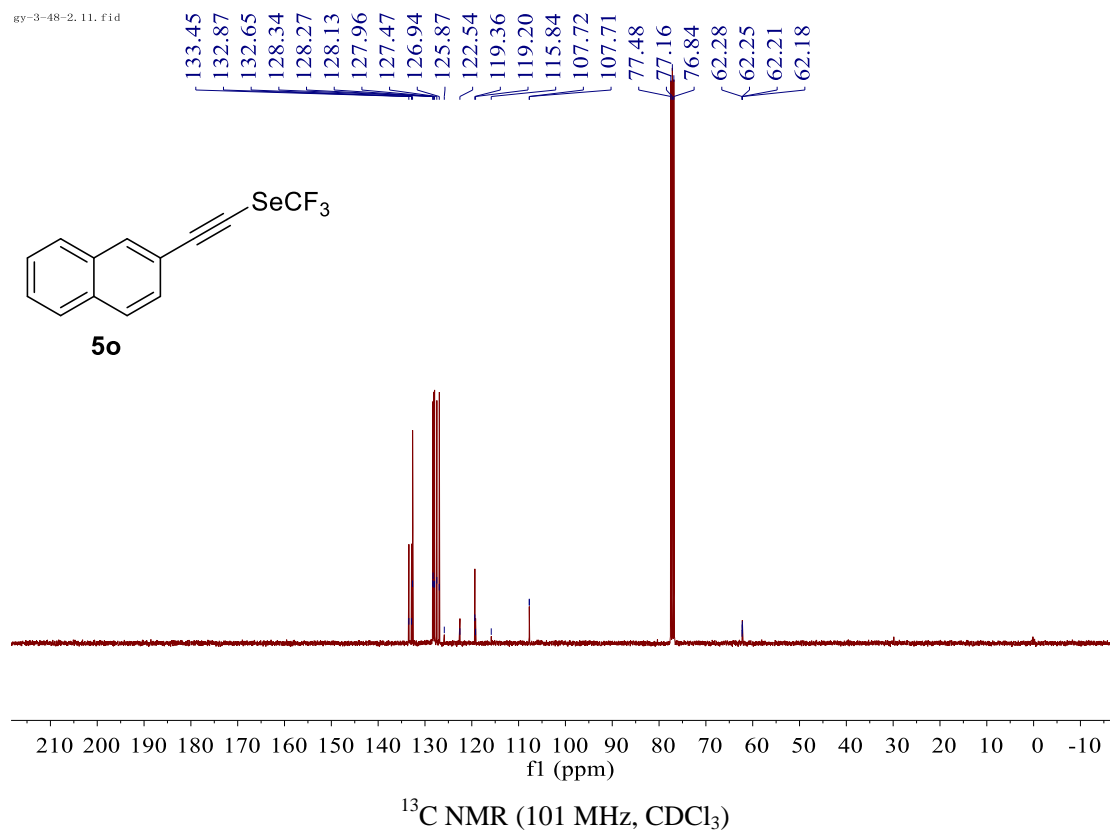

gy-3-48-1.11.fid

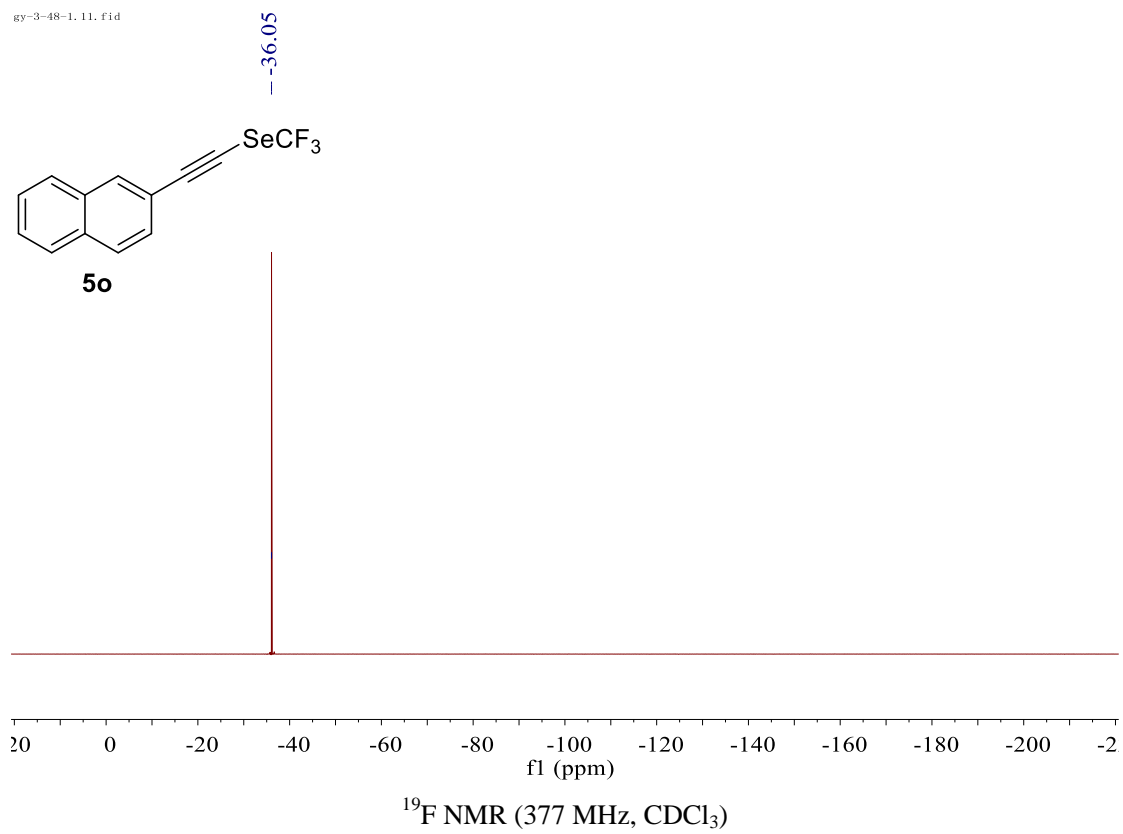

gy-3-63-1.10.fid

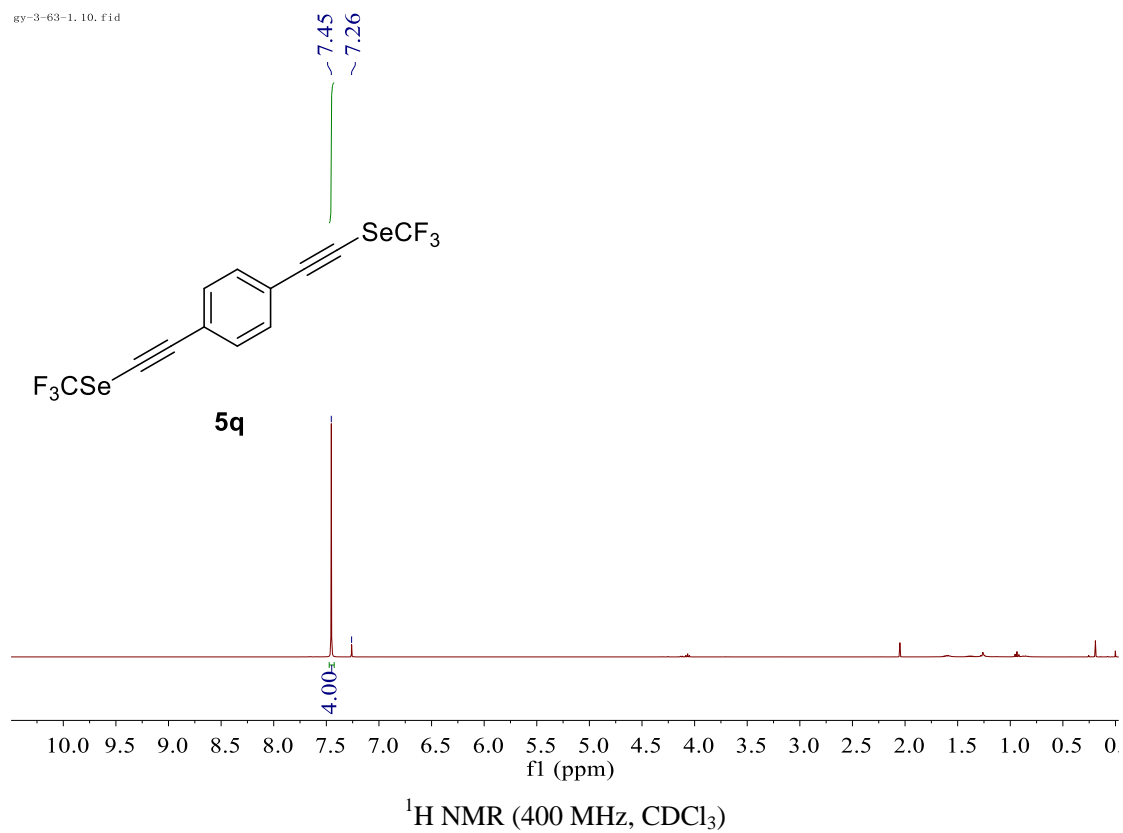

gy-3-63-c, 10, F1d

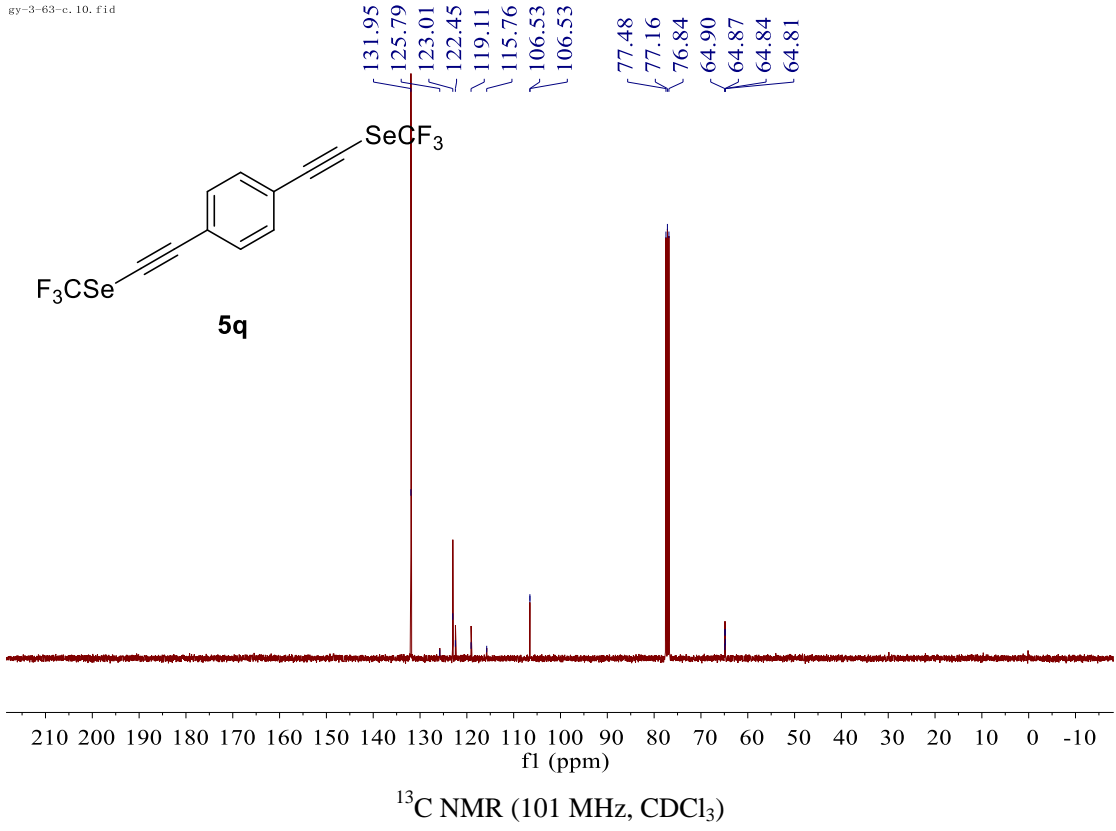

gy-3-63-1, 11, F1d

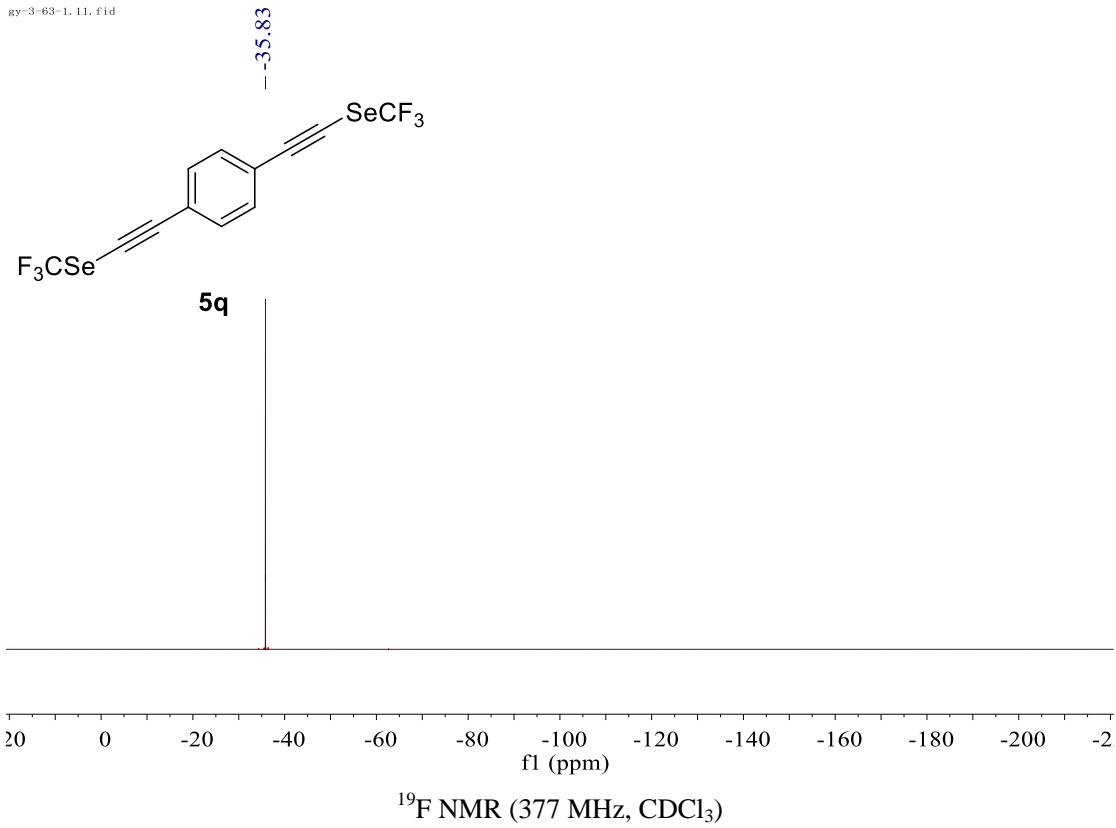

gy-4-22-1.22.fid

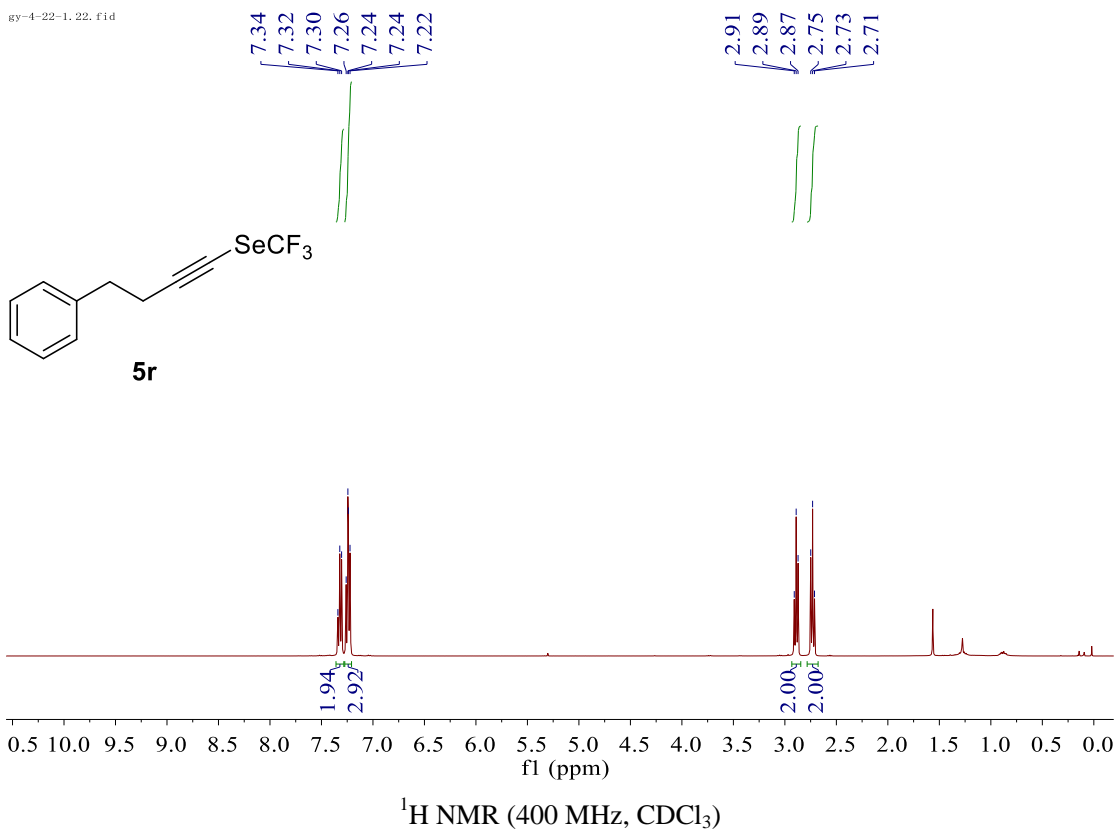

gy-4-22-1-c.10.fid

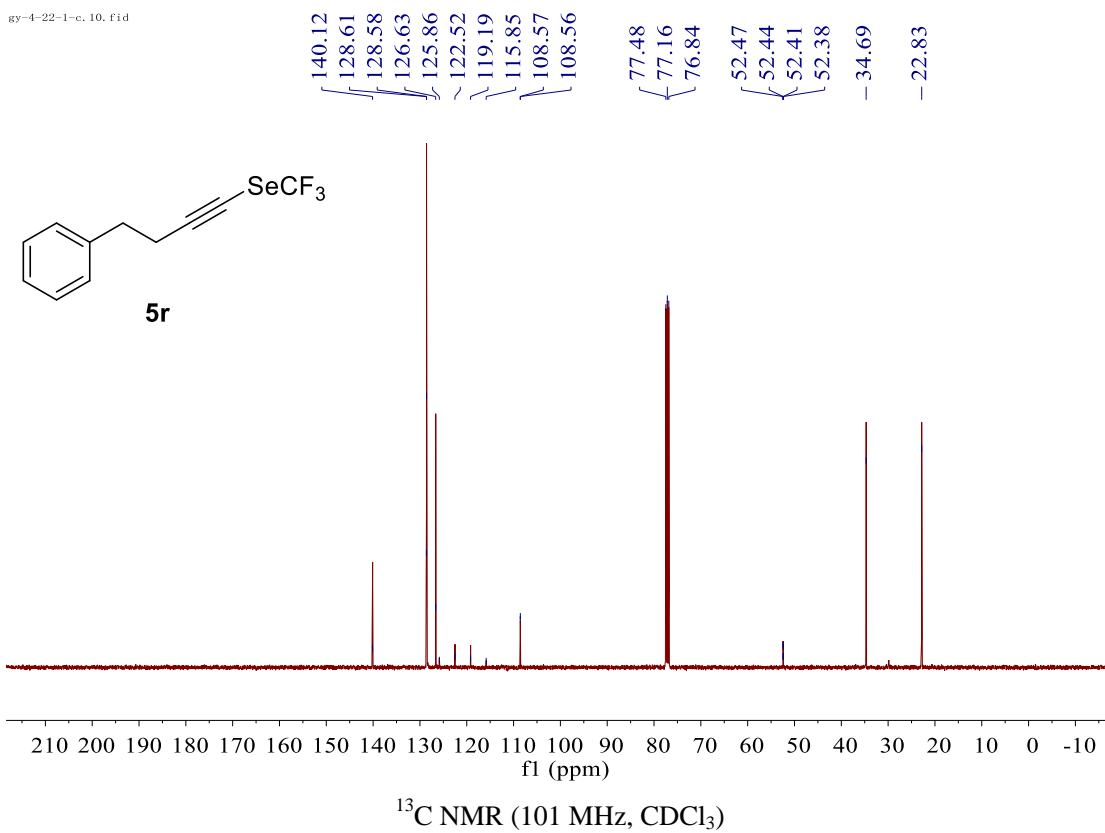

gy-4-22-1.23.fid

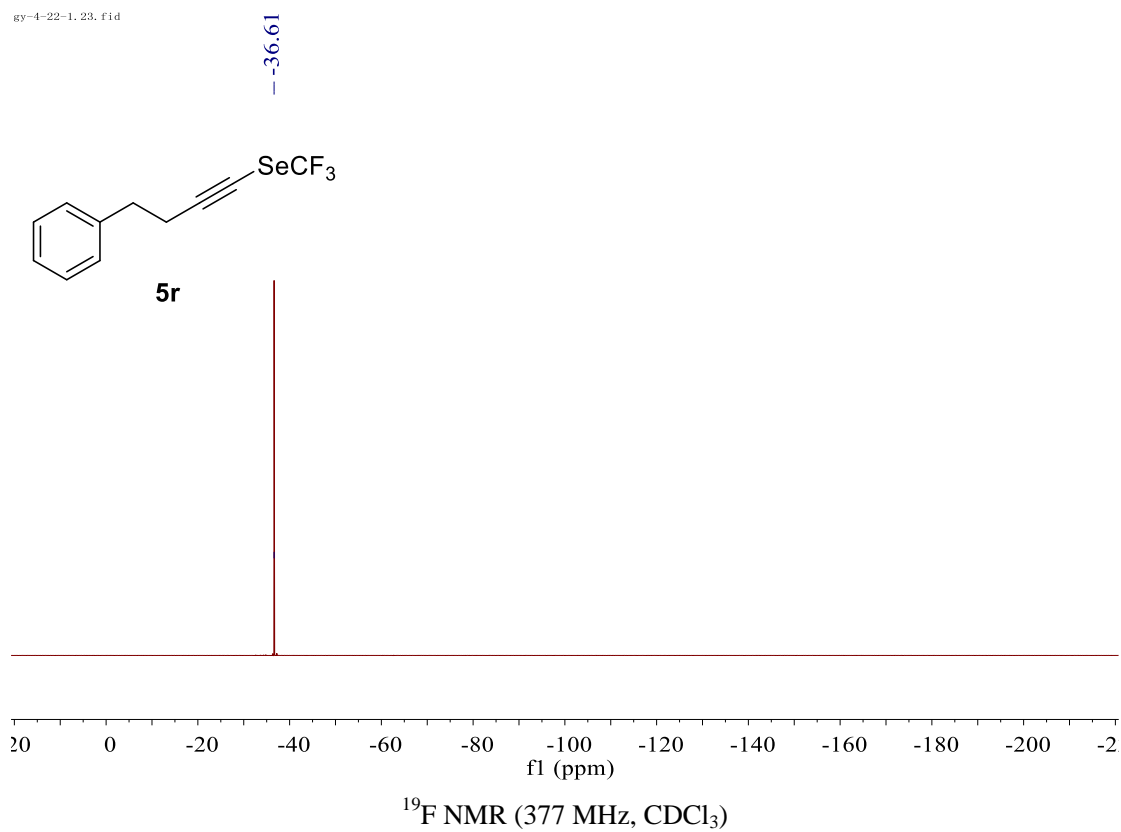

gy-3-92-1.10.fid

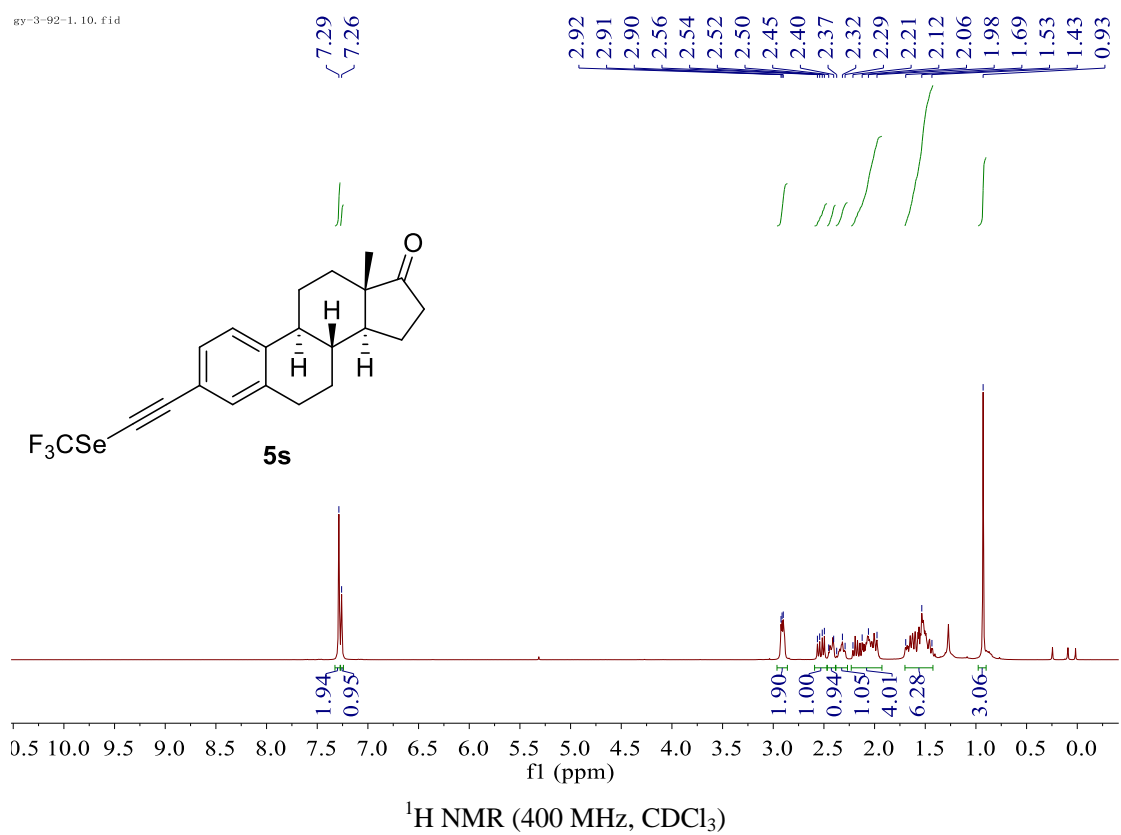

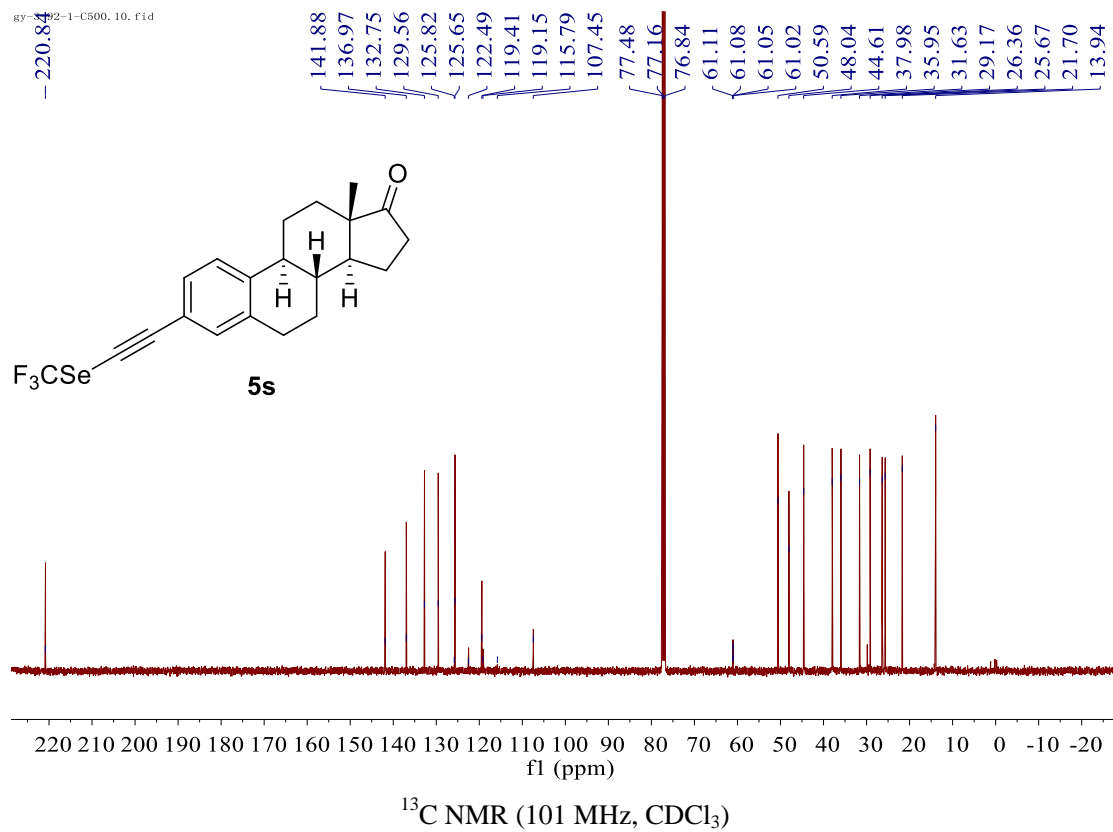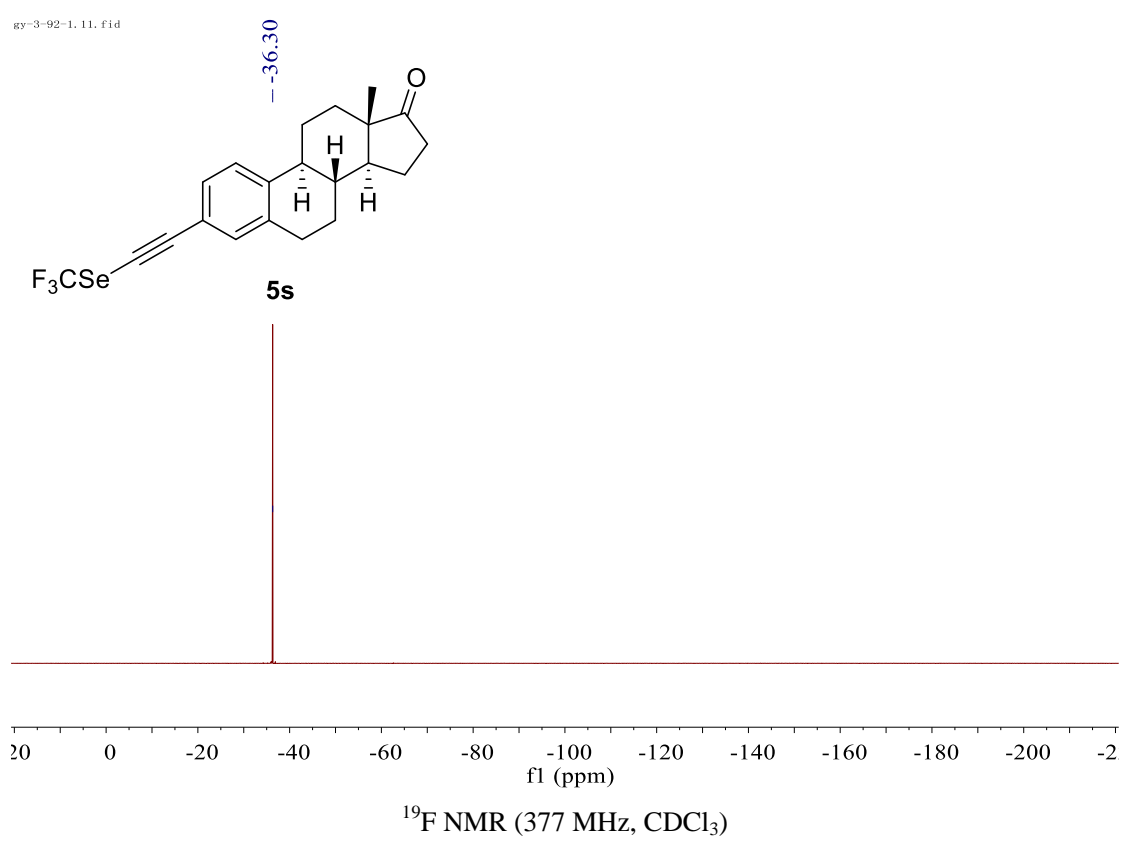

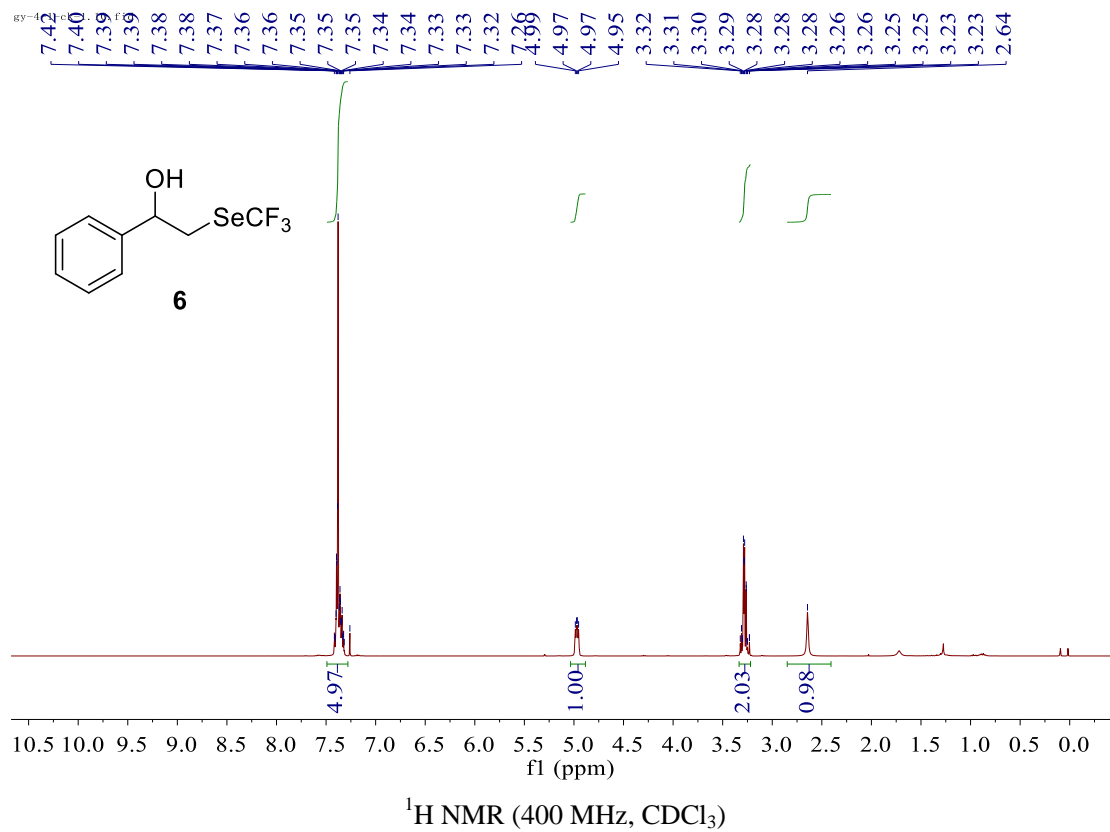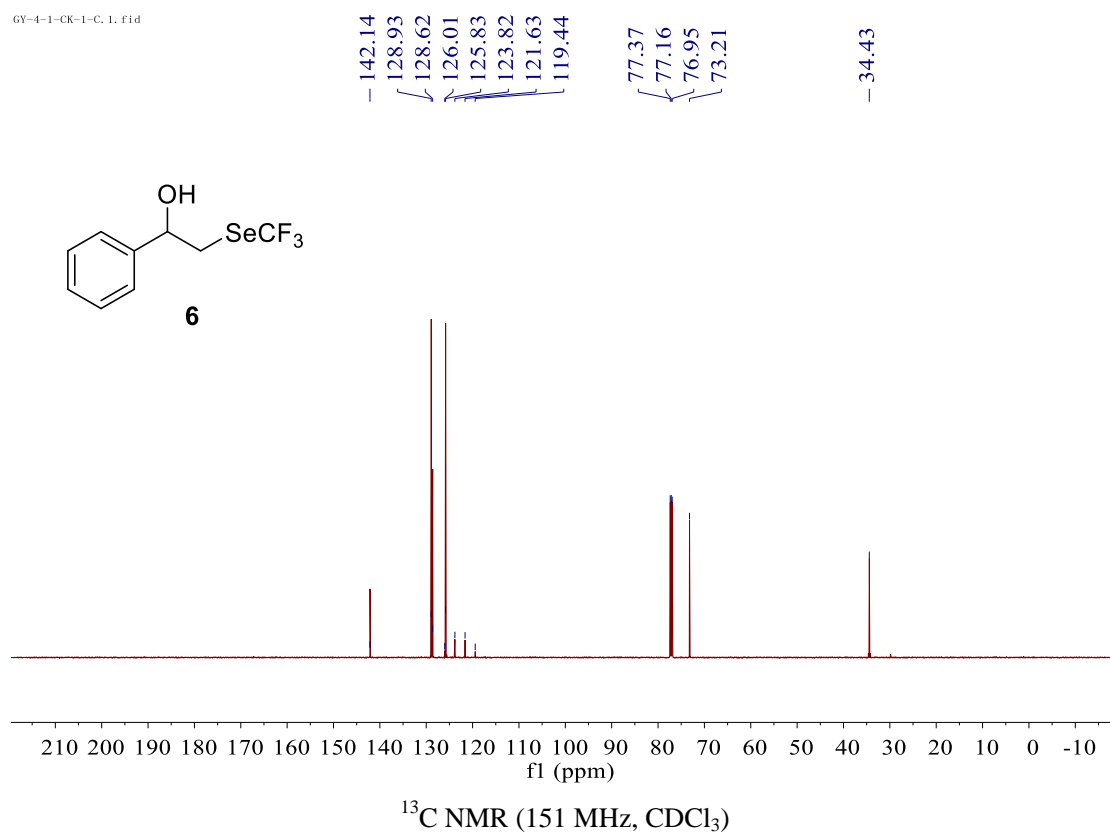

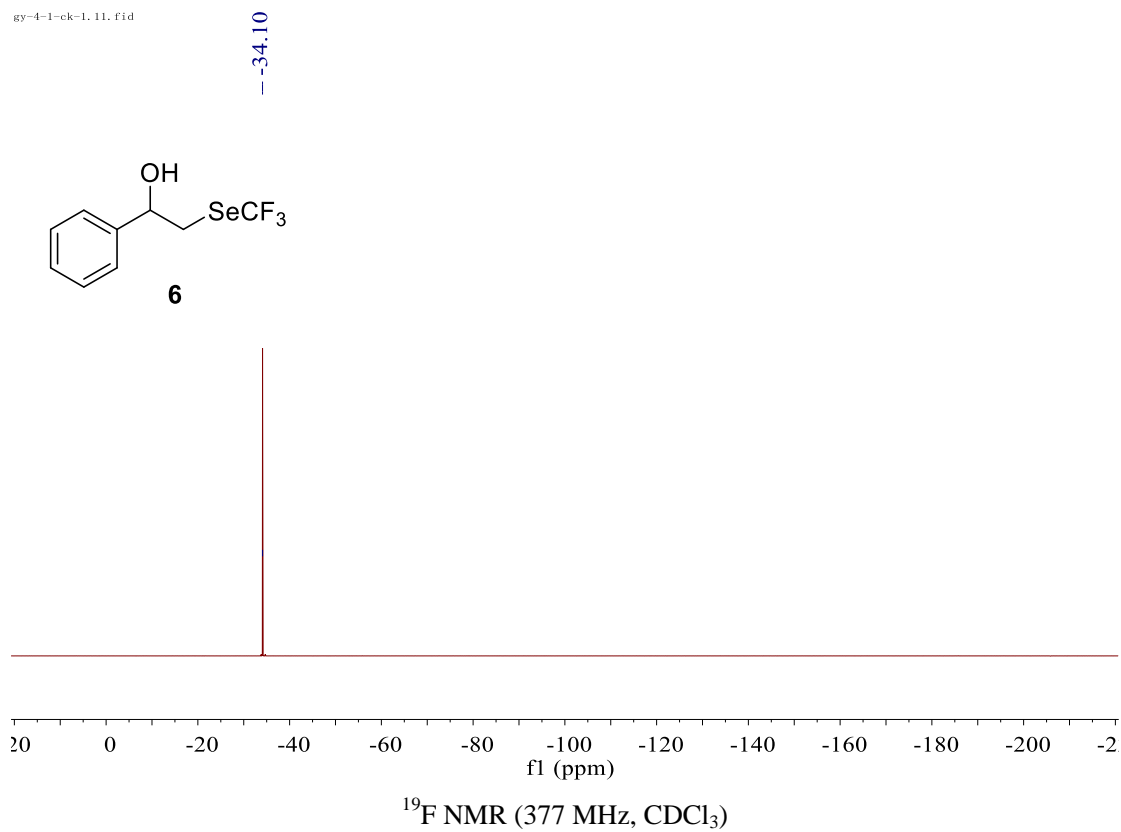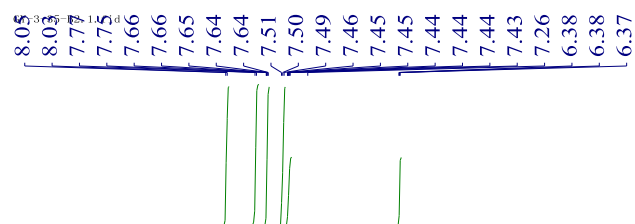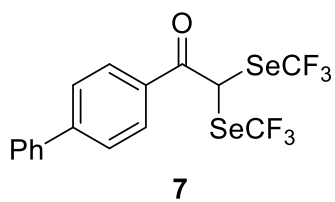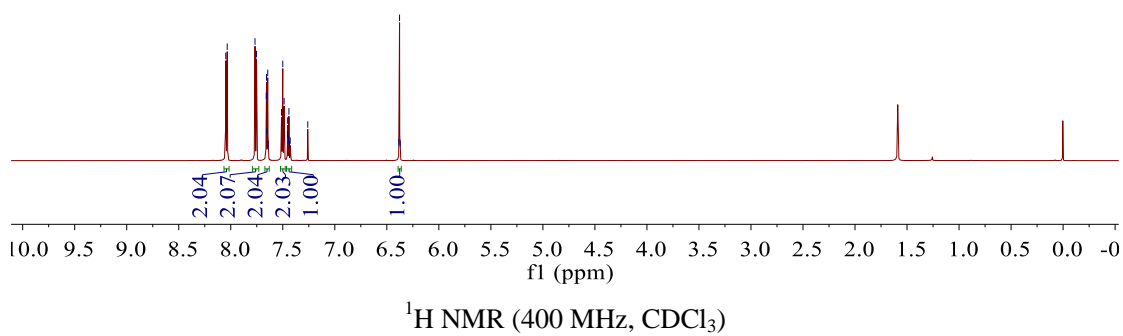



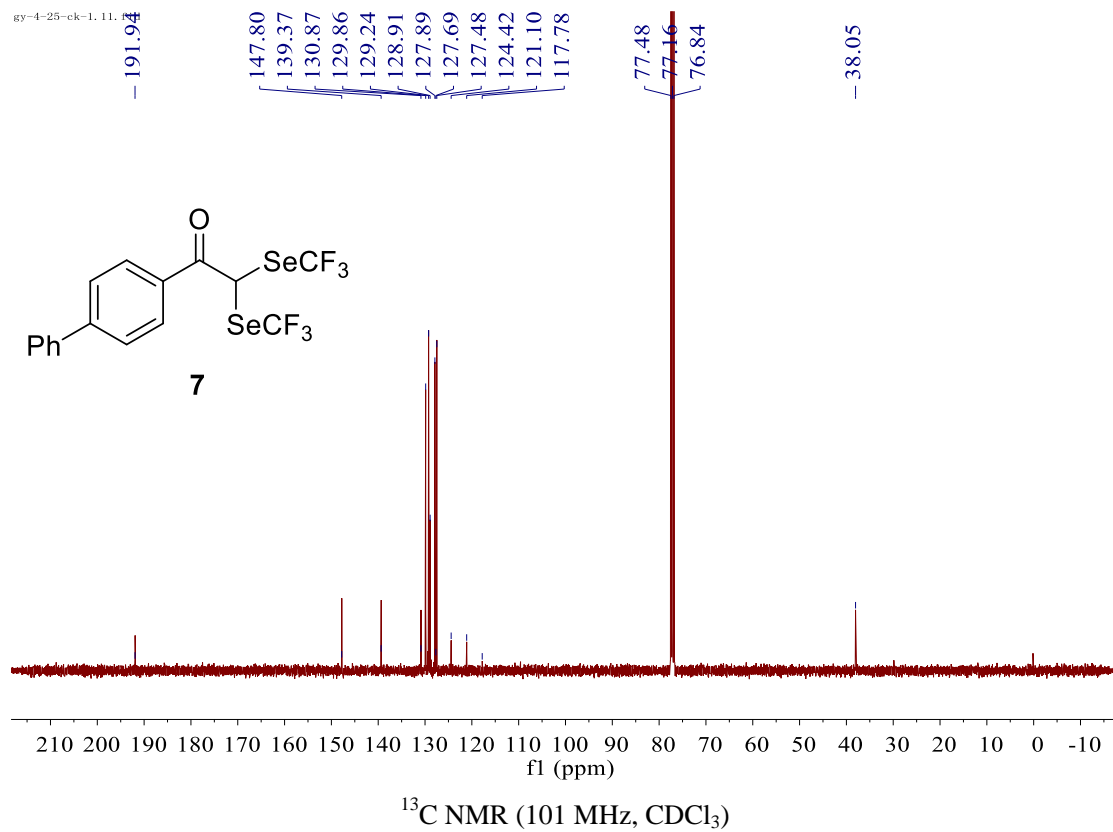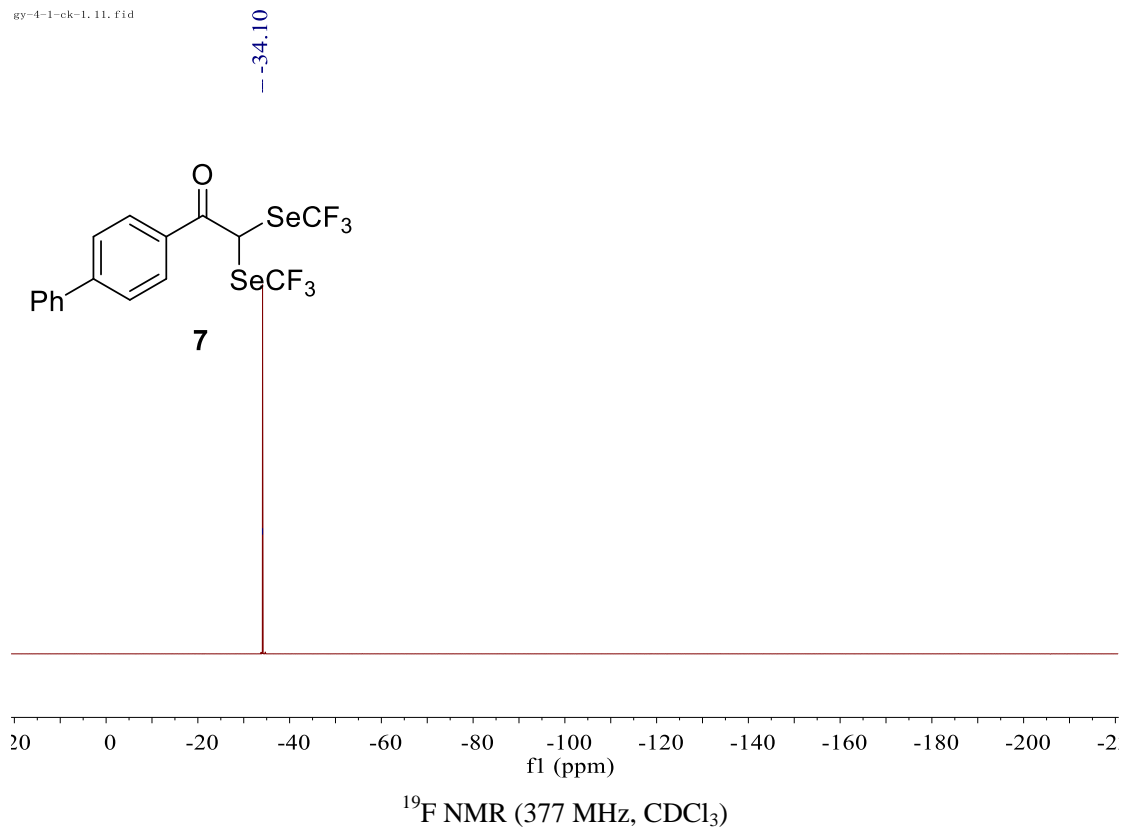

Supplement: d3qo01111a1.pdf [file d3qo01111a1.pdf]
